# Supplementary material for: Nucleophile–nucleofuge duality of azide and arylthiolate groups in the synthesis of quinazoline and tetrazoloquinazoline derivatives
Source: Royal Society of Chemistry journal article supplement (doi:10.1039/d1ob01315g), 2021-01-01

## SUPPORTING INFORMATION

### **Nucleophile–nucleofuge duality of azide and arylthiolate groups in the synthesis of quinazoline and tetrazoloquinazoline derivatives**

Andris Jeminejs, Irina Novosjolova,\*

Ērika Bizdēna, and Māris Turks \*

Institute of Technology of Organic Chemistry  
Faculty of Materials Science and Applied Chemistry, Riga Technical University  
Paula Valdena Str. 3, Riga, LV-1048  
E-mail: [irina.novosjolova@rtu.lv](mailto:irina.novosjolova@rtu.lv), [maris.turks@rtu.lv](mailto:maris.turks@rtu.lv)

## CONTENTS

|                                                                        |    |
|------------------------------------------------------------------------|----|
| NMR spectra .....                                                      | 3  |
| 5-(Alkylamino)tetrazolo[1,5- <i>c</i> ]quinazolines .....              | 3  |
| 5-(Alkylthio)tetrazolo[1,5- <i>c</i> ]quinazolines .....               | 13 |
| 5-(Alkyloxy)tetrazolo[1,5- <i>c</i> ]quinazolines .....                | 17 |
| 5-(Alkyloxy)tetrazolo[1,5- <i>a</i> ]quinazolines .....                | 24 |
| 2,4-Bis-(arylthio)quinazolines .....                                   | 32 |
| 2-Amino-4-(1 <i>H</i> -1,2,3-triazol-1-yl)quinazolines .....           | 42 |
| 4-(Alkyl/Aryloxy)-2-(1 <i>H</i> -1,2,3-triazol-1-yl)quinazolines ..... | 56 |
| Azide-tetrazole equilibrium studies .....                              | 62 |
| UV/Vis absorption and emission spectra .....                           | 64 |

# NMR spectra

## 5-(Alkylamino)tetrazolo[1,5-c]quinazolines

Tautomeric mixture of 5-(piperidin-1-yl)tetrazolo[1,5-c]quinazoline (4a-T) and 4-azido-2-(piperidin-1-yl)quinazoline (4a-A)

$^1\text{H-NMR}$  (500 MHz,  $\text{DMSO-d}_6$ ) spectrum of compound 4a:

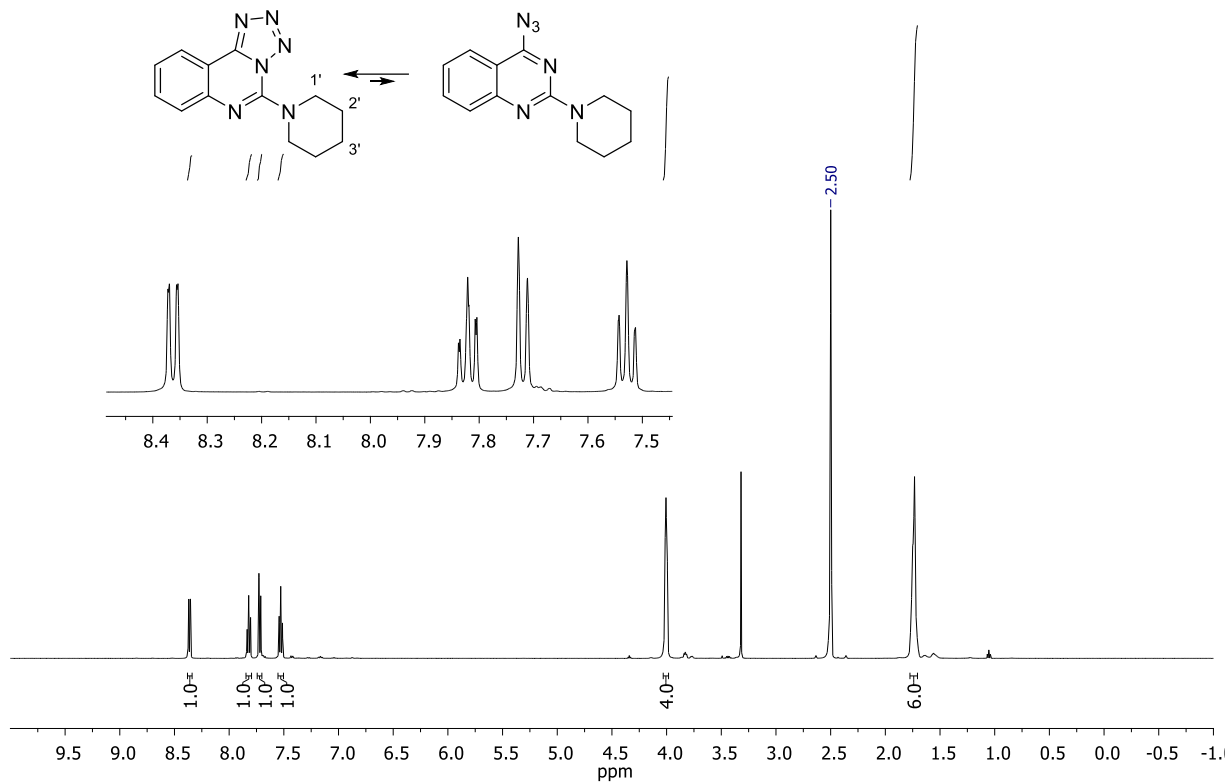

**$^{13}\text{C}$ -NMR (125.7 MHz,  $\text{DMSO-d}_6$ ) spectrum of compound 4a:**

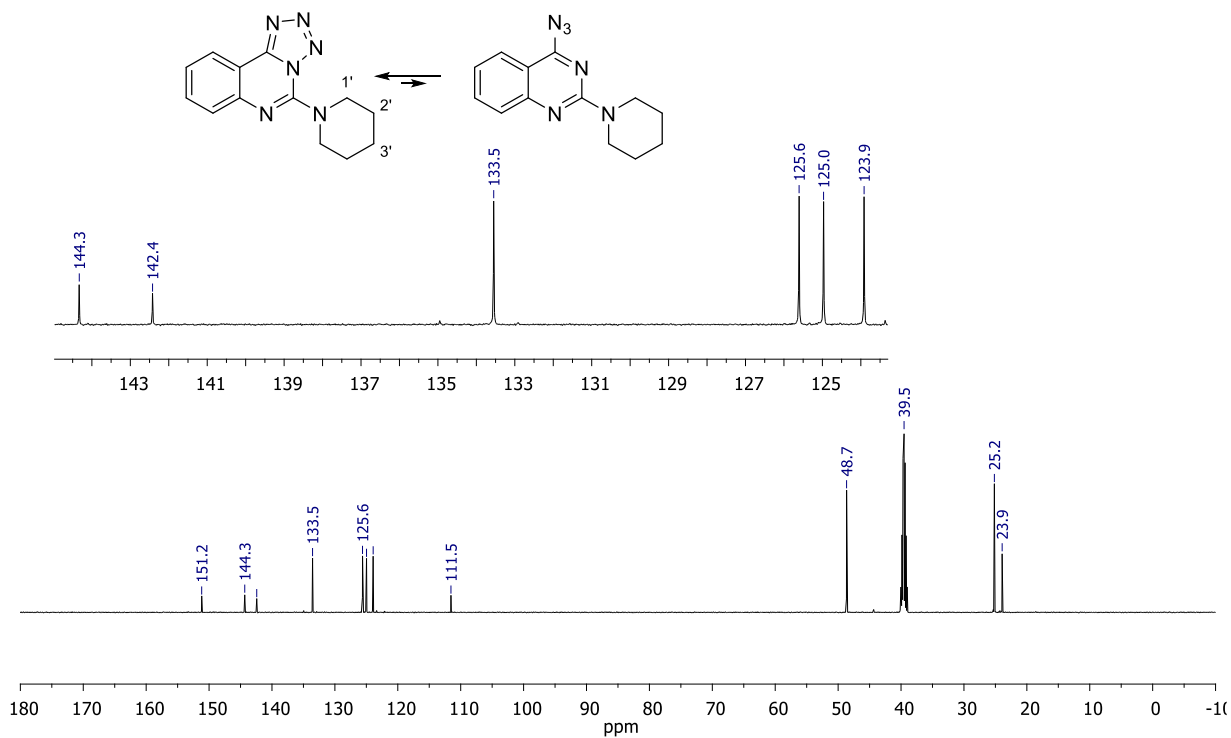

**5-(Octylamino)tetrazolo[1,5-c]quinazoline (4b)**

**$^1\text{H}$ -NMR (500 MHz,  $\text{CDCl}_3$ ) spectrum of compound 4b:**

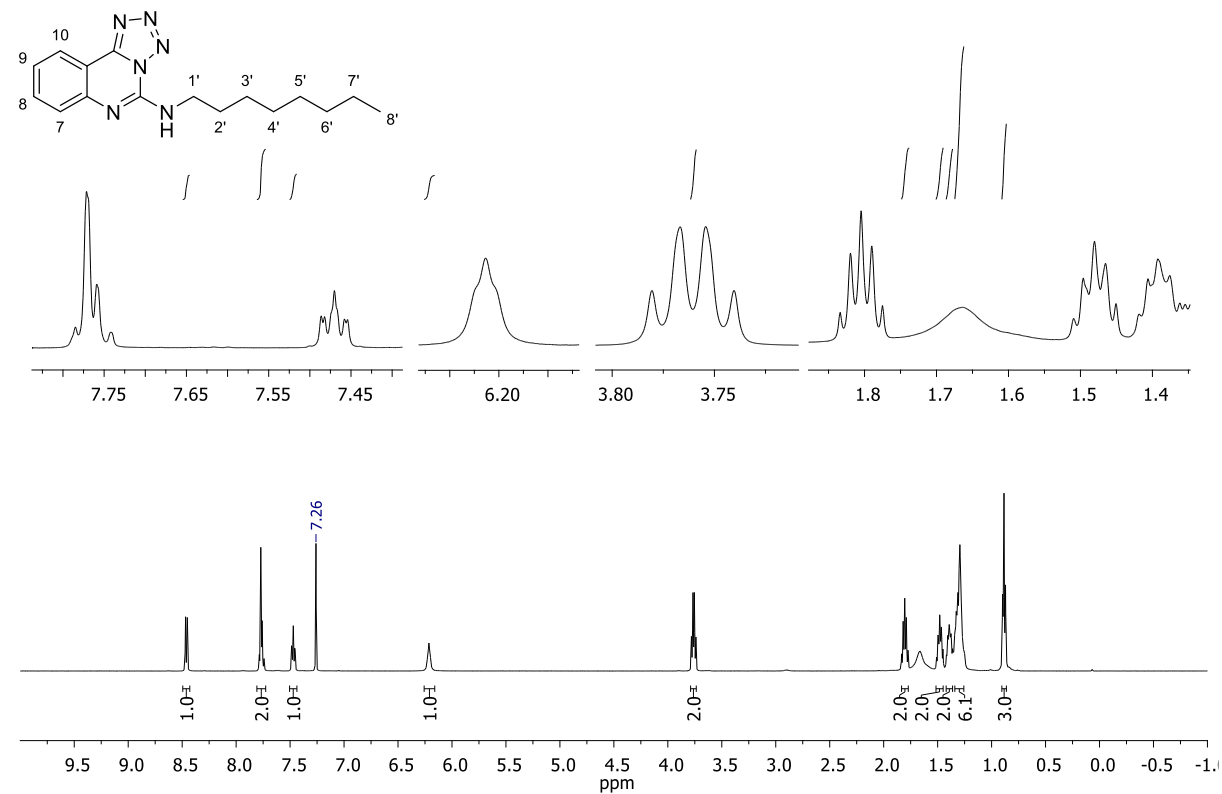

**$^{13}\text{C}$ -NMR (125.7 MHz,  $\text{CDCl}_3$ ) spectrum of compound 4b:**

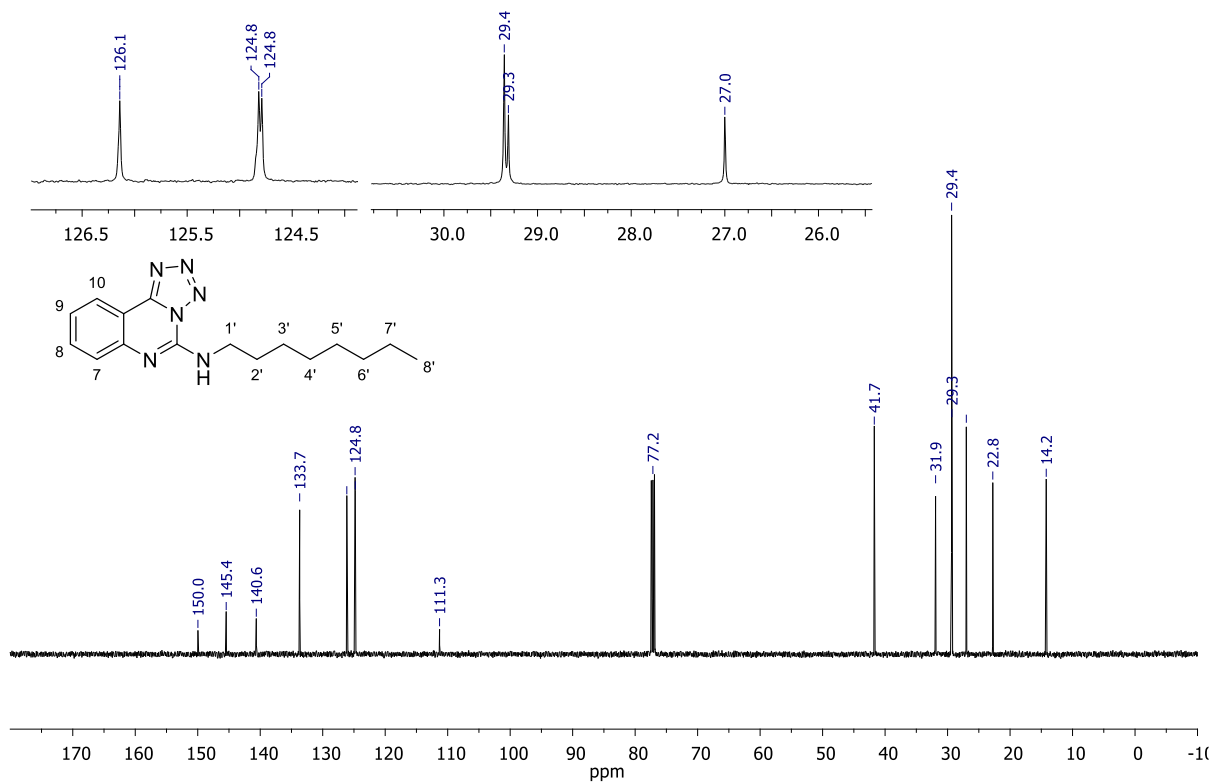

**HSQC spectrum of compound 4b:**

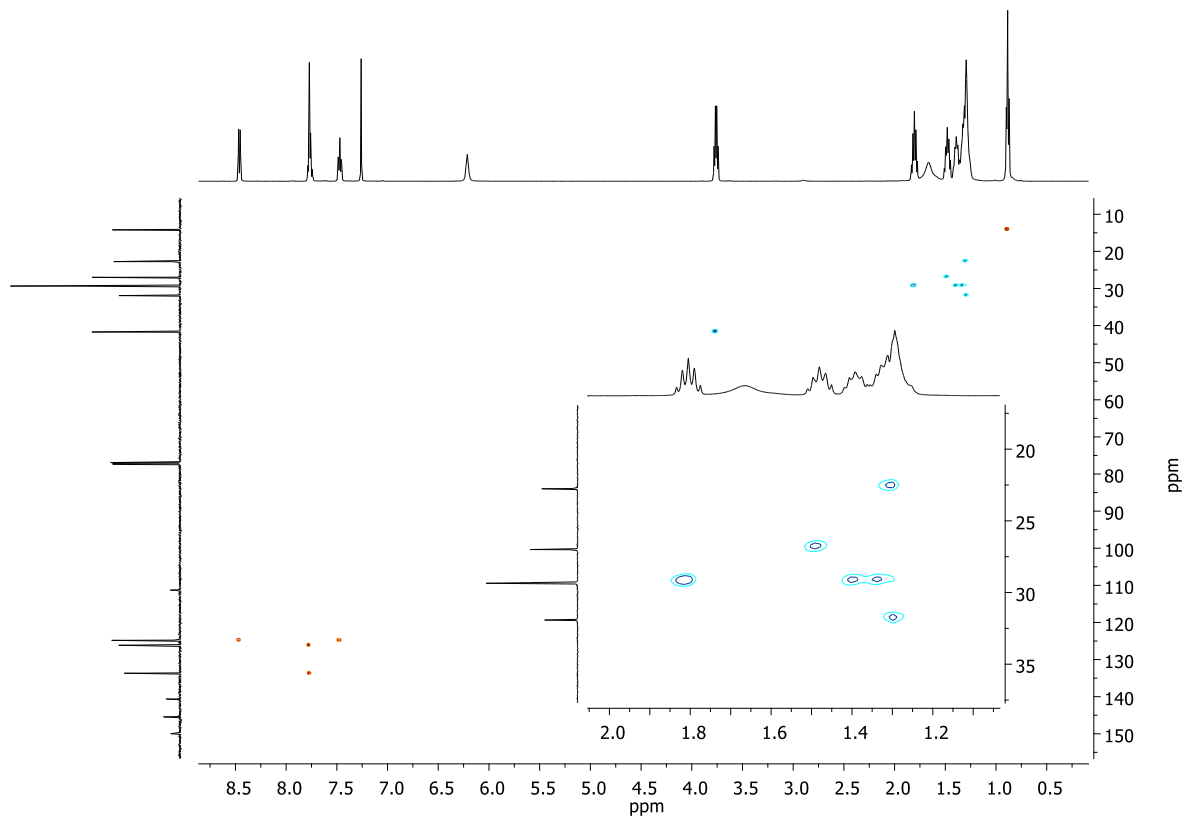

HMBC spectrum of compound 4b:

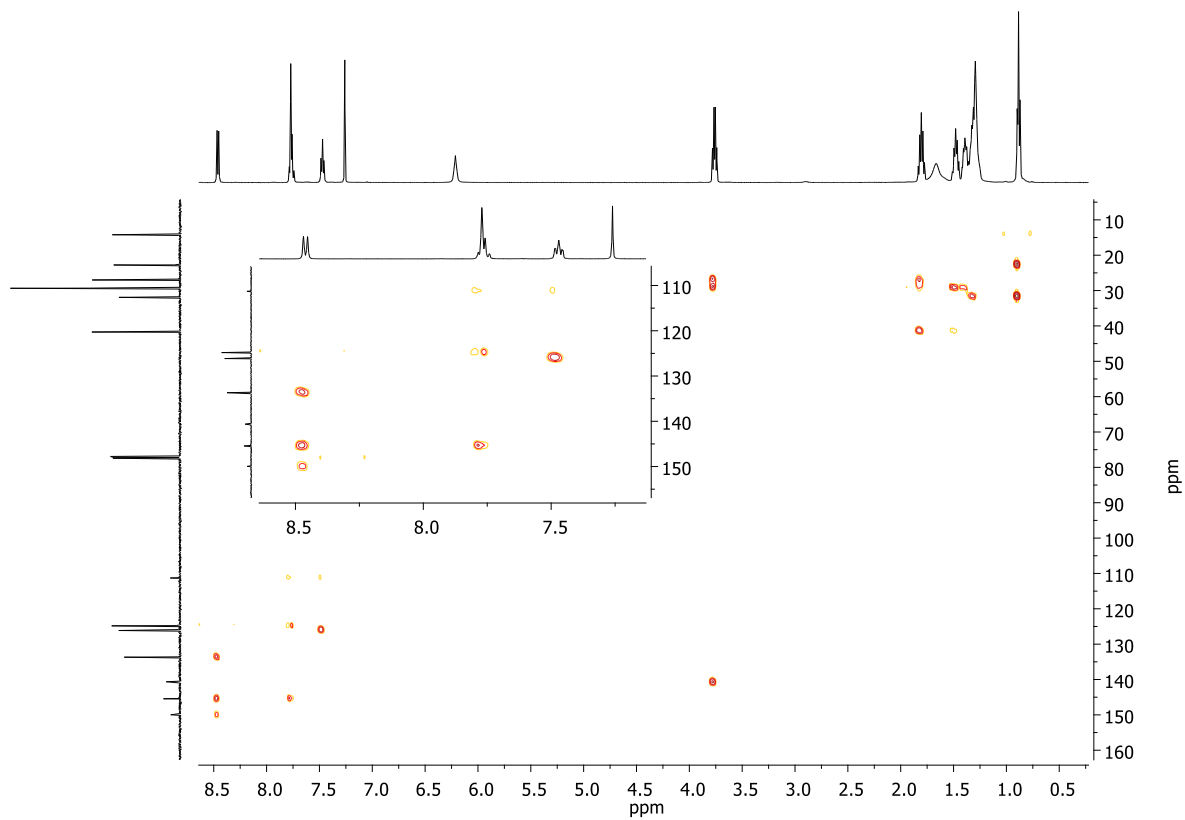

COSY spectrum of compound 4b:

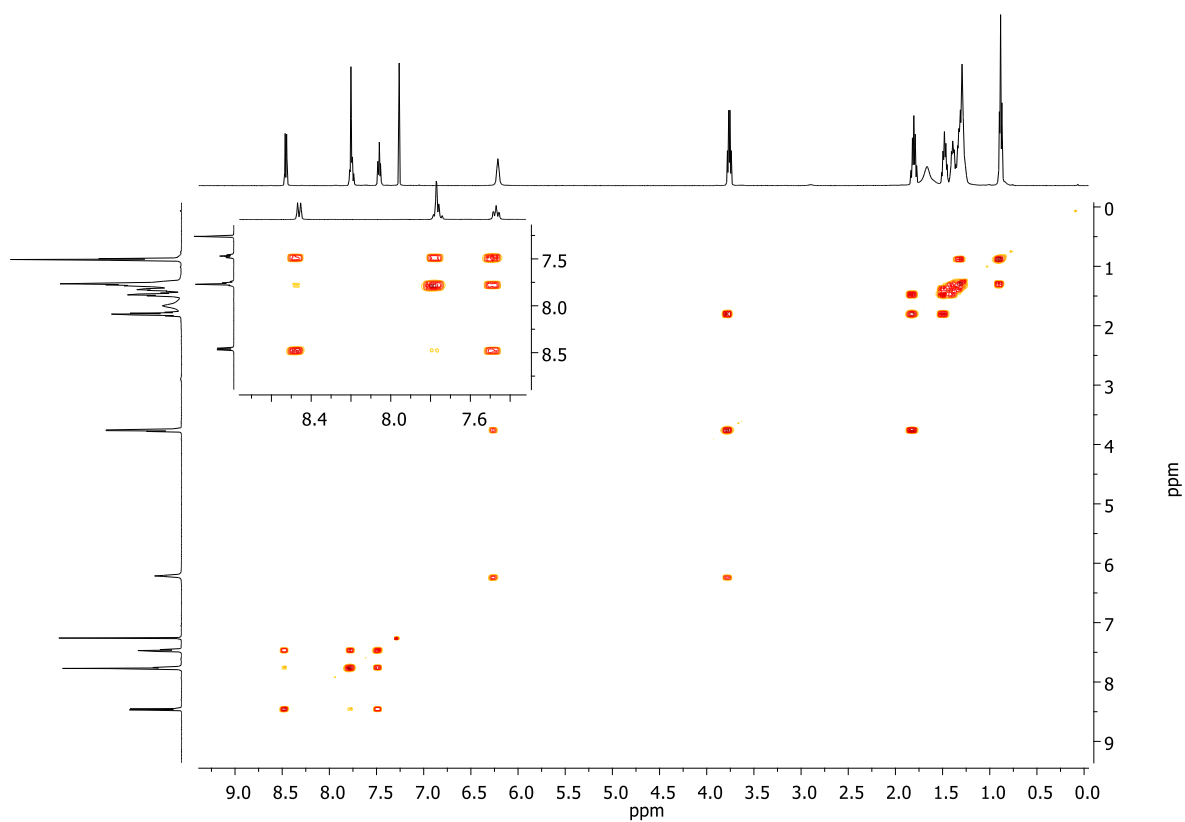

**5-(Pyrrolidin-1-yl)tetrazolo[1,5-c]quinazoline (4c)**  
**<sup>1</sup>H-NMR (500 MHz, DMSO-d<sub>6</sub>) spectrum of compound 4c:**

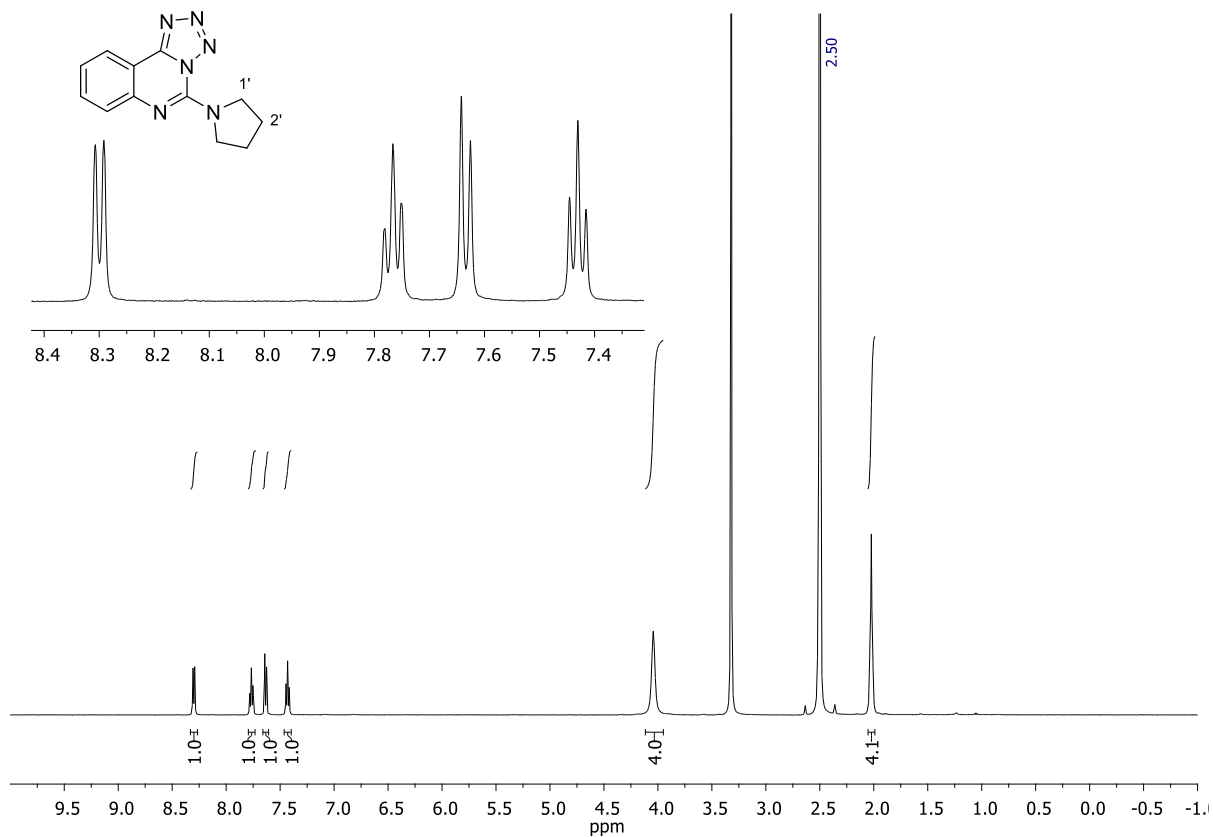

**<sup>13</sup>C-NMR (125.7 MHz, DMSO-d<sub>6</sub>) spectrum of compound 4c:**

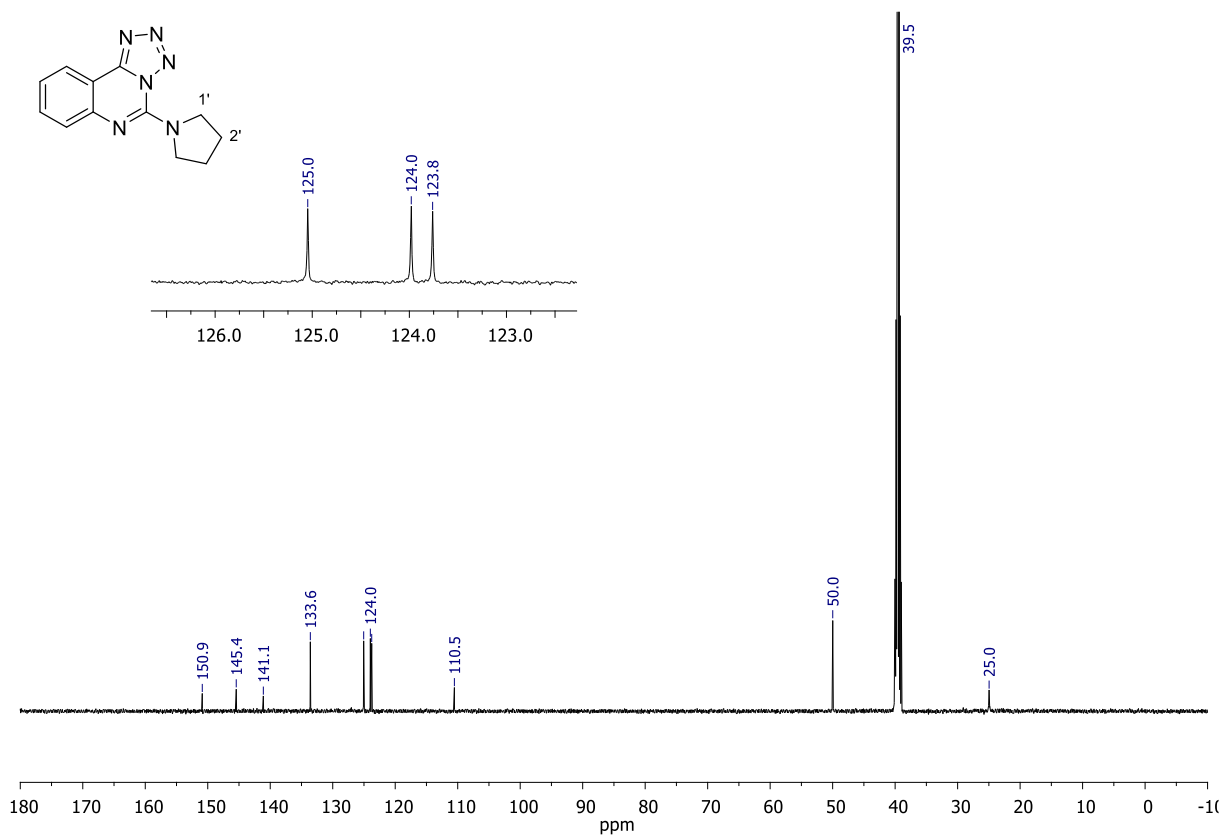

**Tautomeric mixture of 5-(4-methylpiperazin-1-yl)tetrazolo[1,5-c]quinazoline (4d-T) and 4-azido-2-(4-methylpiperazin-1-yl)quinazoline (4d-A)**

**<sup>1</sup>H-NMR (500 MHz, DMSO-d<sub>6</sub>) spectrum of compound 4d:**

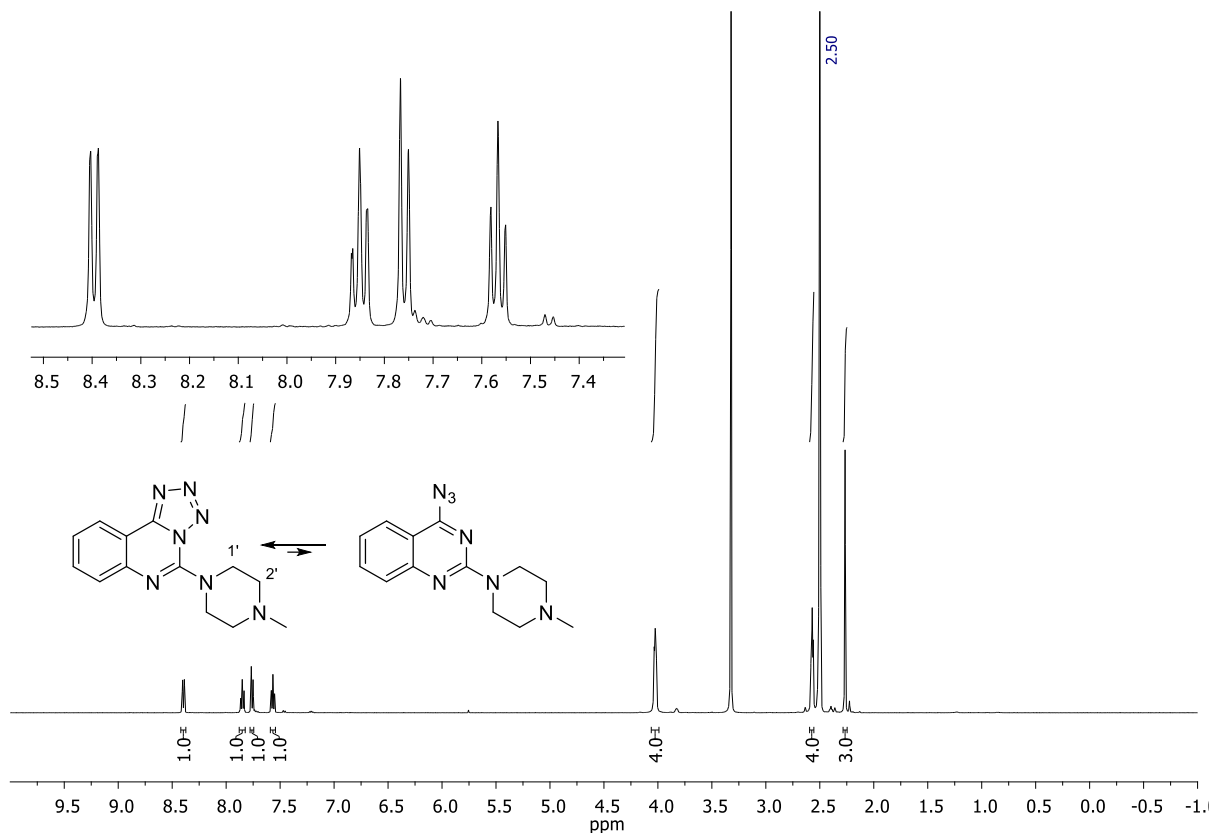

**<sup>13</sup>C-NMR (125.7 MHz, DMSO-d<sub>6</sub>) spectrum of compound 4d:**

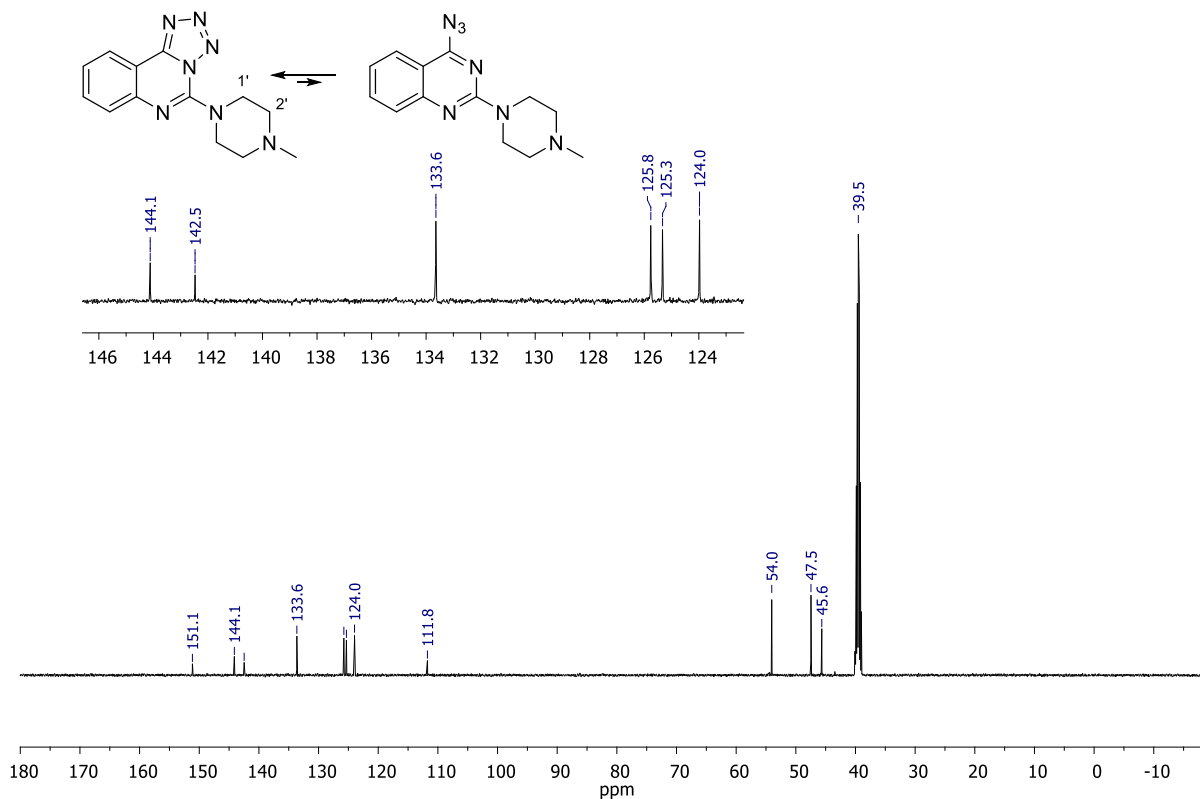



Tautomeric mixture of 5-(morpholin-4-yl)tetrazolo[1,5-c]quinazoline (4e-T) and 4-azido-2-(morpholin-4-yl)quinazoline (4e-A)

$^1\text{H-NMR}$  (500 MHz,  $\text{DMSO-d}_6$ ) spectrum of compound 4e:

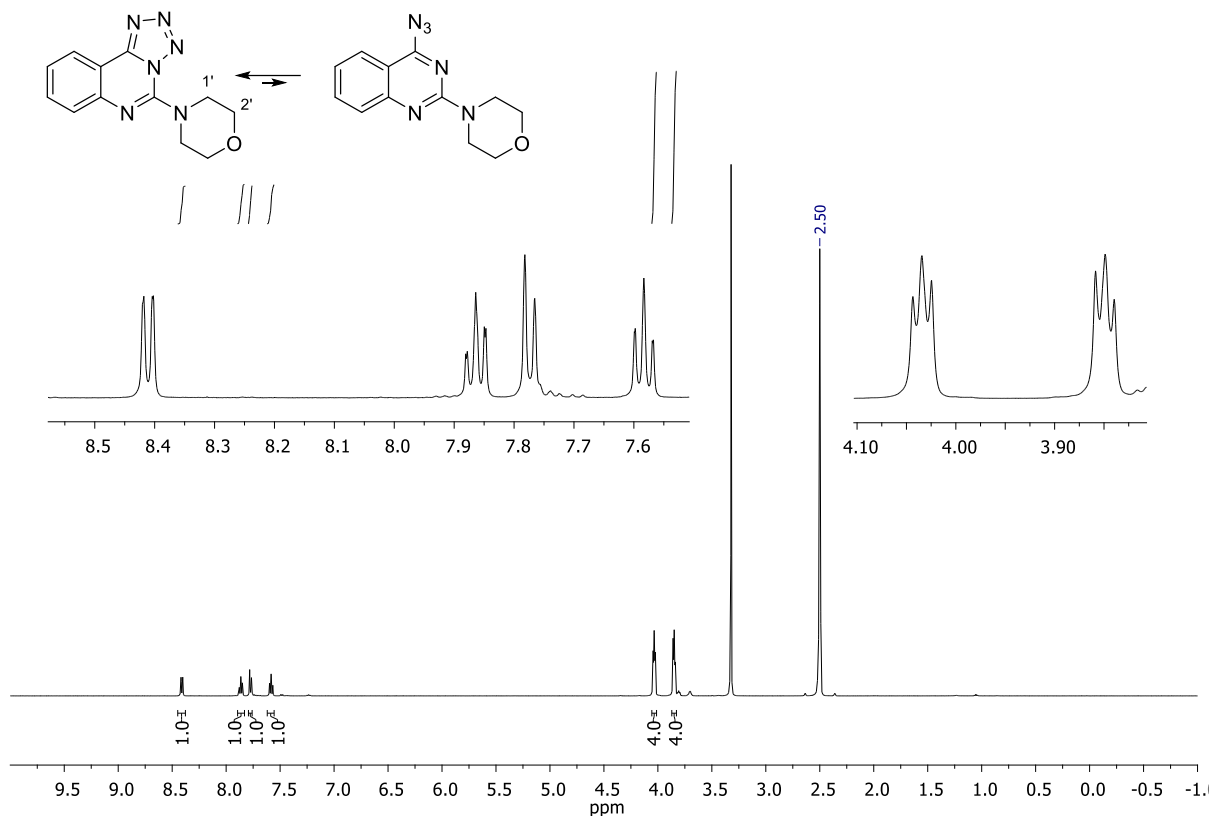

$^{13}\text{C-NMR}$  (125.7 MHz,  $\text{DMSO-d}_6$ ) spectrum of compound 4e:

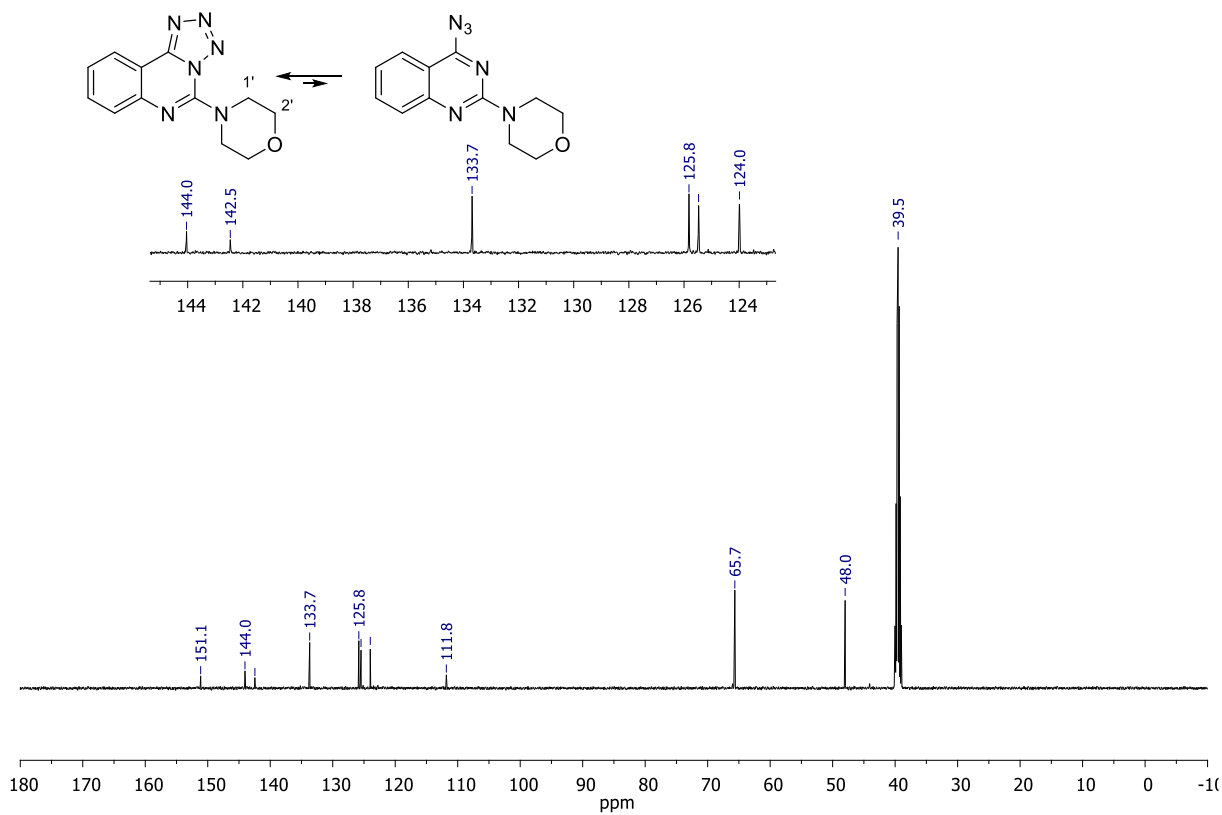

HSQC spectrum of compound 4e:

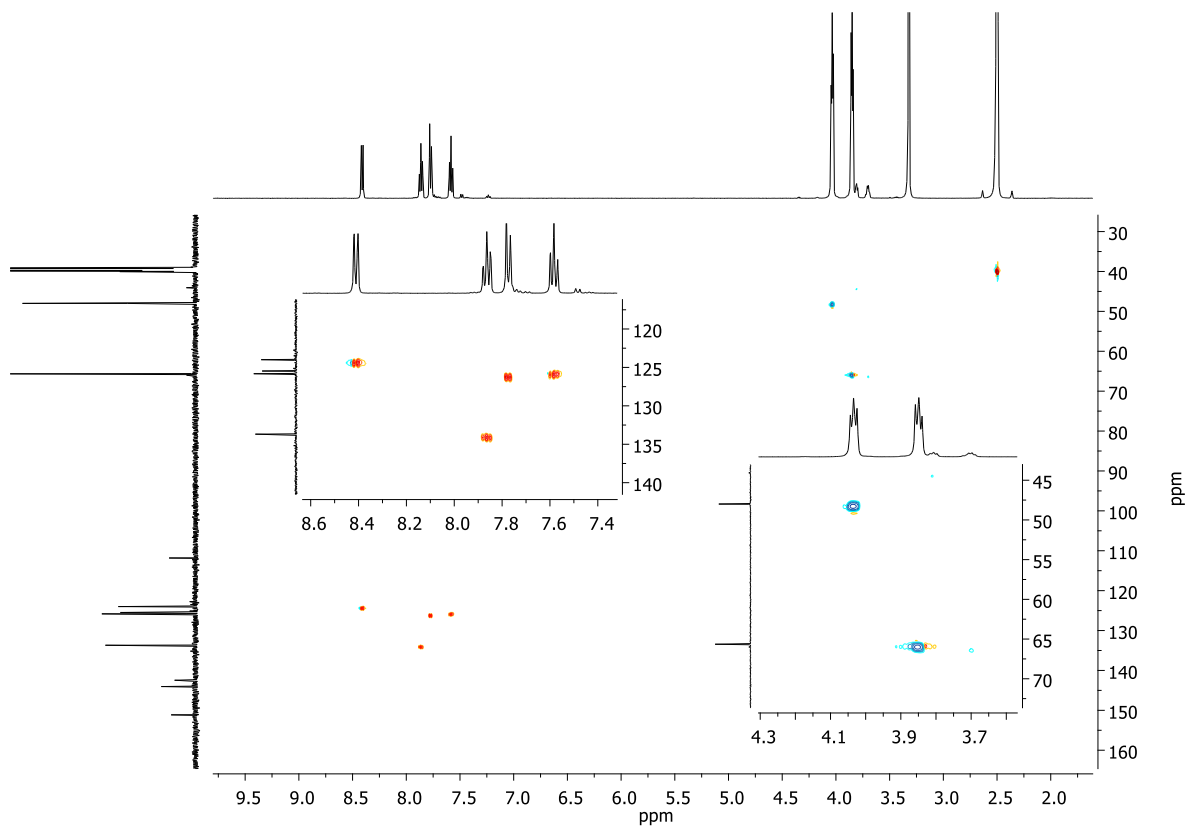

COSY spectrum of compound 4e:

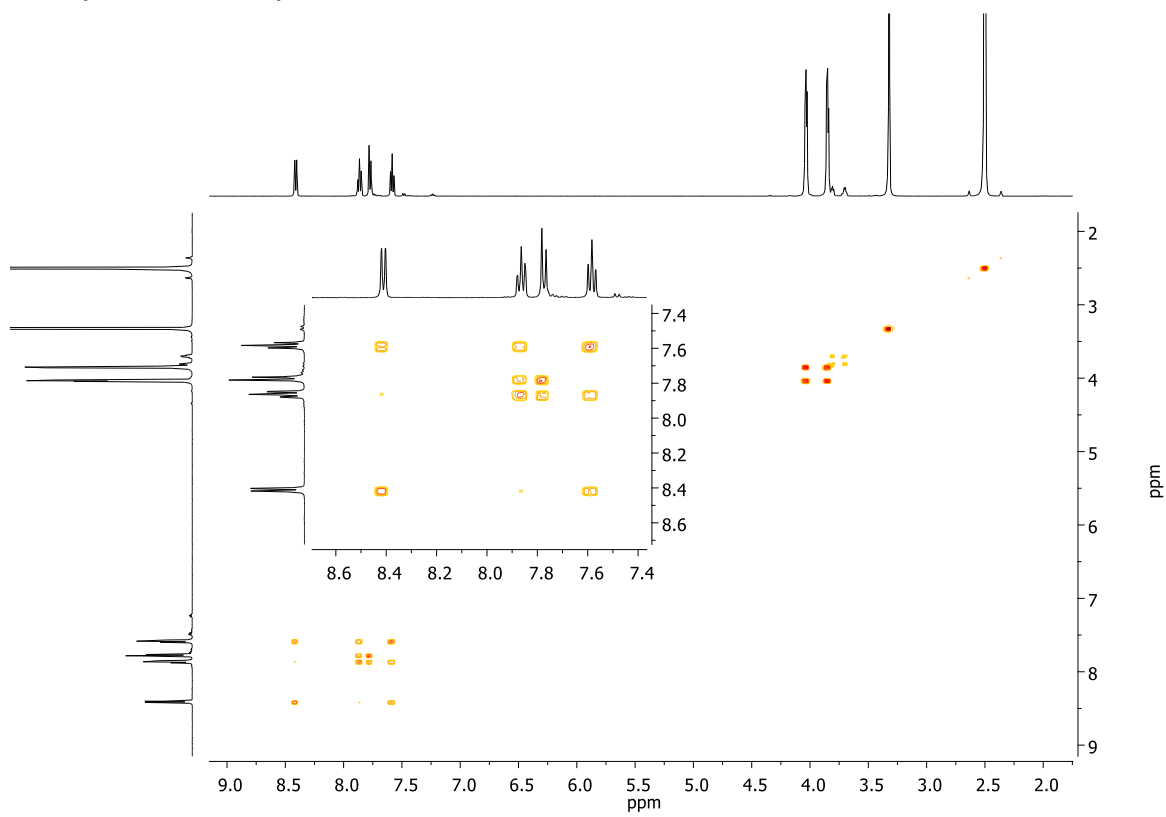

**Tautomeric mixture of 5-(diethylamino)tetrazolo[1,5-c]quinazoline (4f-T) and 4-azido-2-(diethylamino)quinazoline (4f-A)**

**$^1\text{H-NMR}$  (500 MHz,  $\text{DMSO-d}_6$ ) spectrum of compound 4f:**

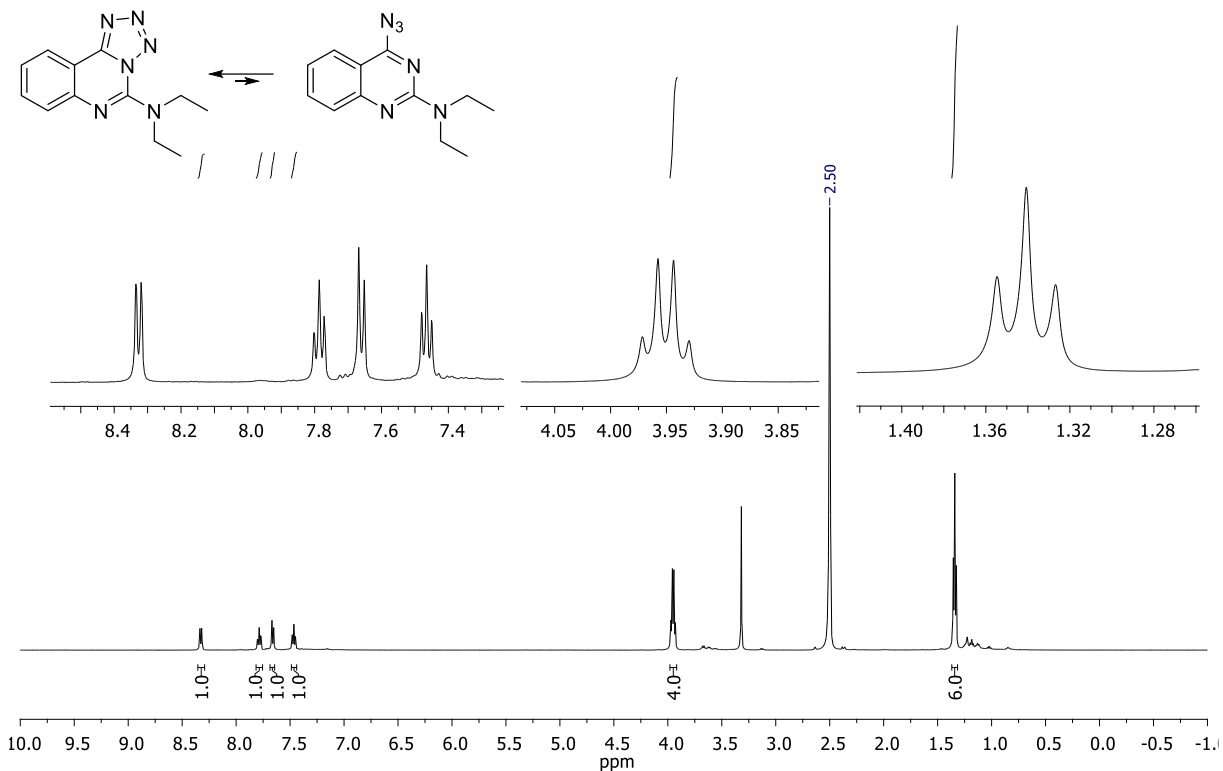

**$^{13}\text{C-NMR}$  (125.7 MHz,  $\text{DMSO-d}_6$ ) spectrum of compound 4f:**

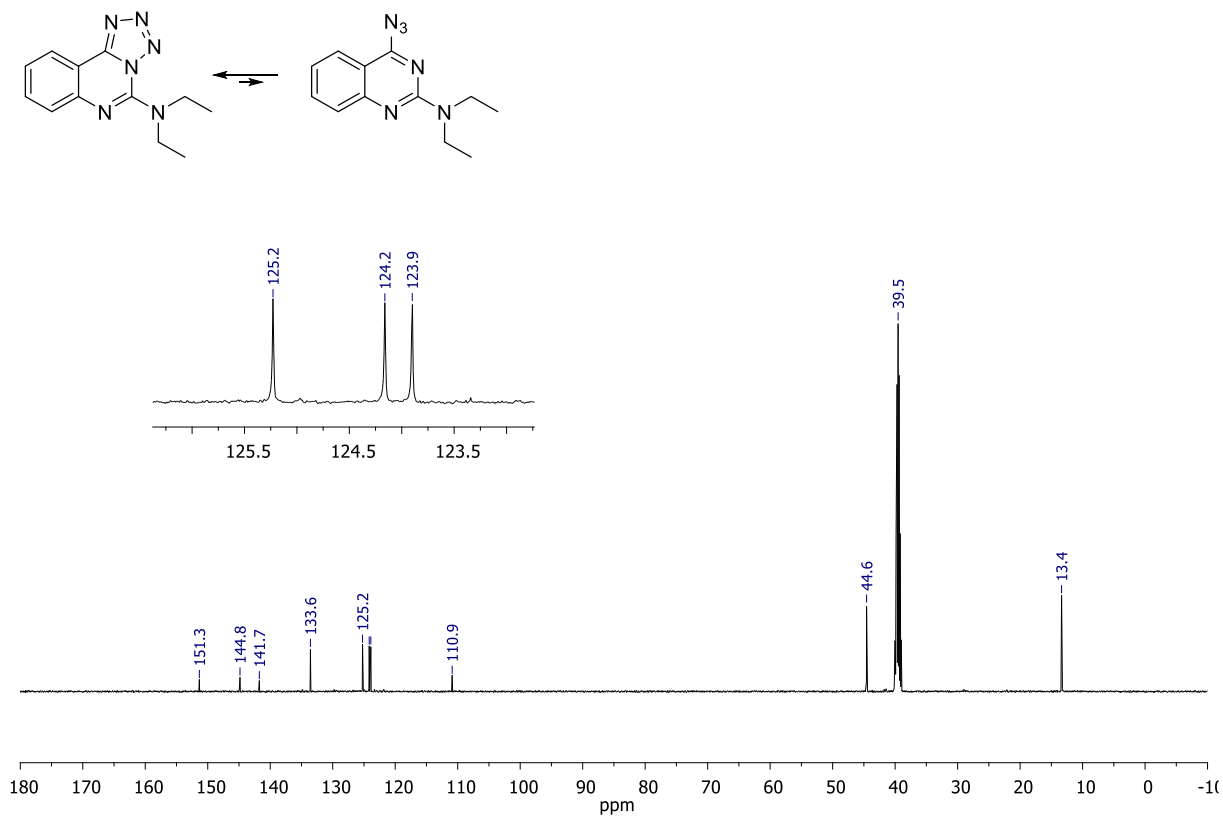

Tautomeric mixture of tetrazolo[1,5-c]quinazolin-5-yl-L-proline (4g-T) and (4-azidoquinazolin-2-yl)-L-proline (4g-A)

$^1\text{H-NMR}$  (500 MHz,  $\text{DMSO-d}_6$ , 50 °C) spectrum of compound 4g:

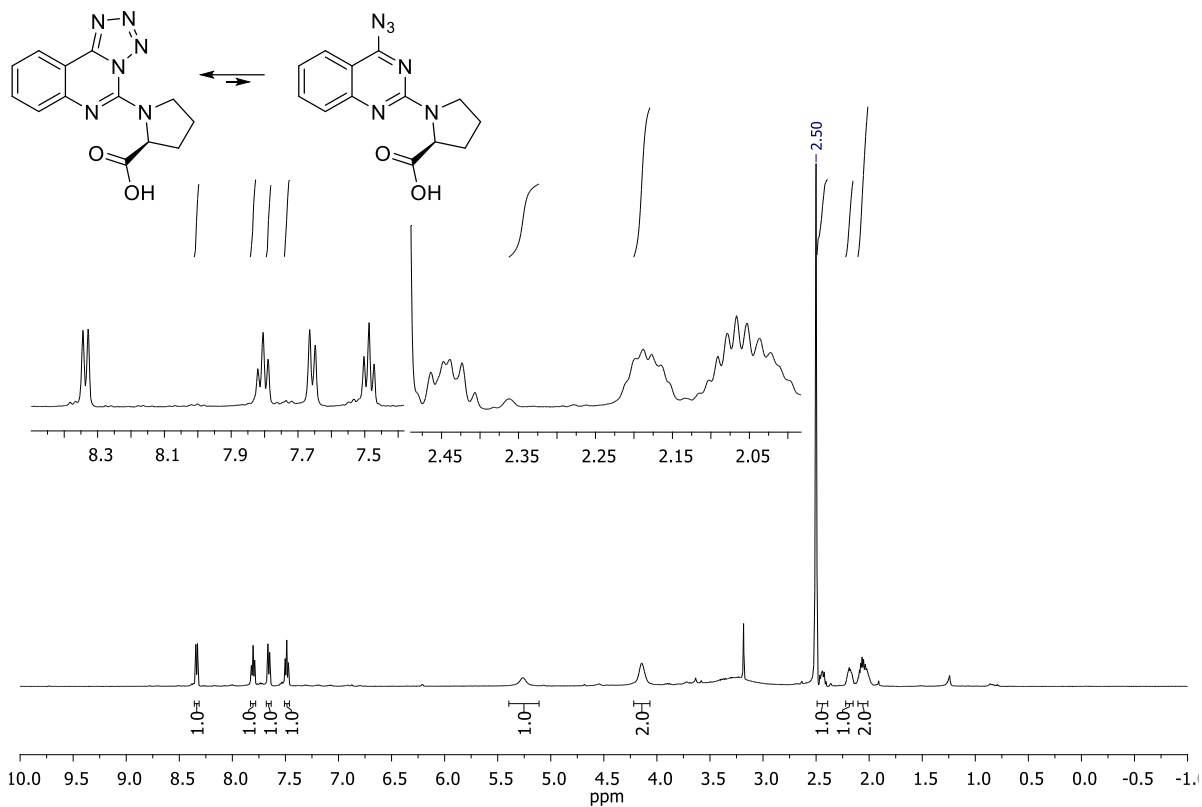

$^{13}\text{C-NMR}$  (125.7 MHz,  $\text{DMSO-d}_6$ , 50 °C) spectrum of compound 4g:

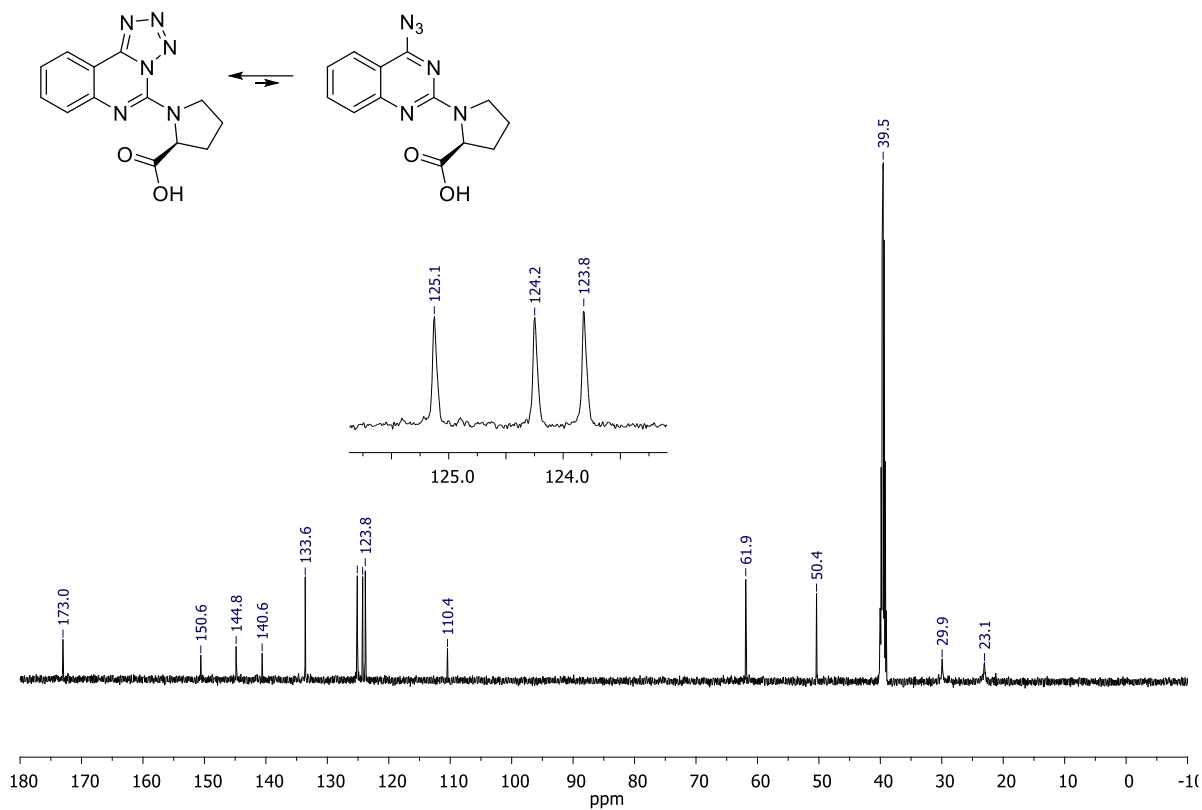

# 5-(Alkylthio)tetrazolo[1,5-c]quinazolines

## 5-(Decylthio)tetrazolo[1,5-c]quinazoline (6a)

$^1\text{H-NMR}$  (500 MHz,  $\text{CDCl}_3$ ) spectrum of compound 6a:

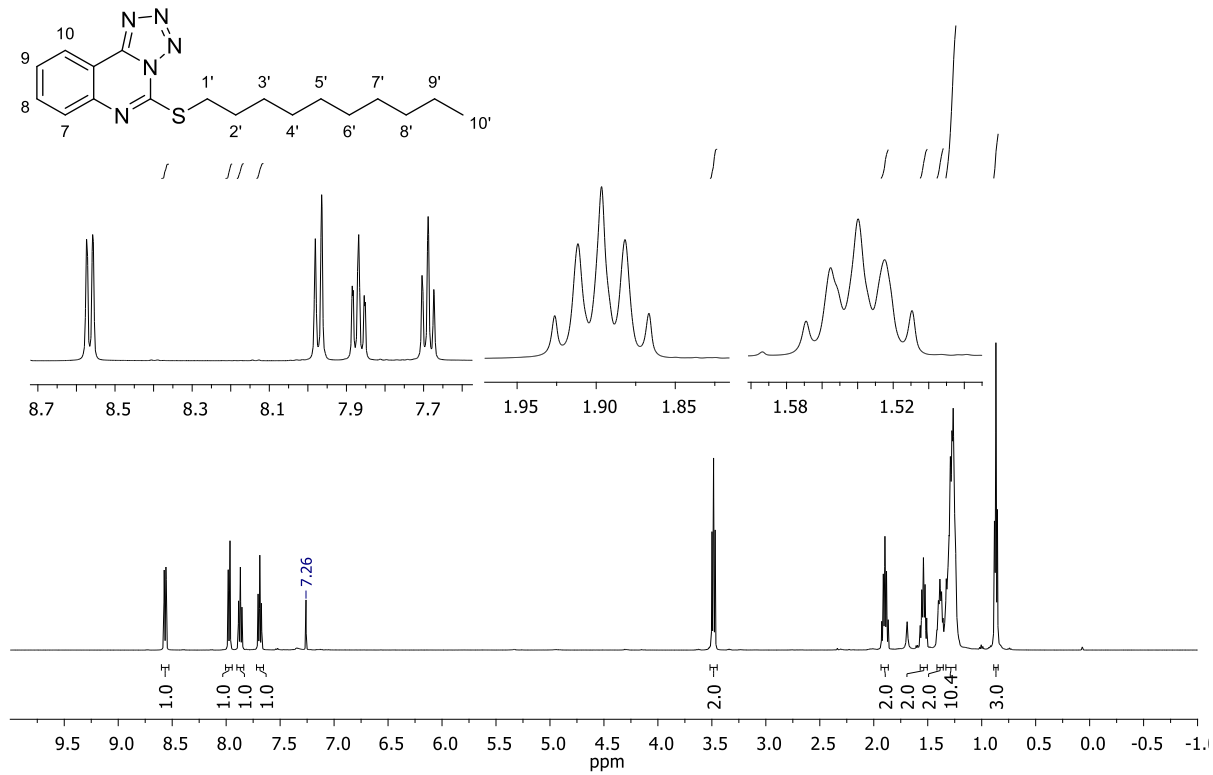

$^{13}\text{C-NMR}$  (125.7 MHz,  $\text{CDCl}_3$ ) spectrum of compound 6a:

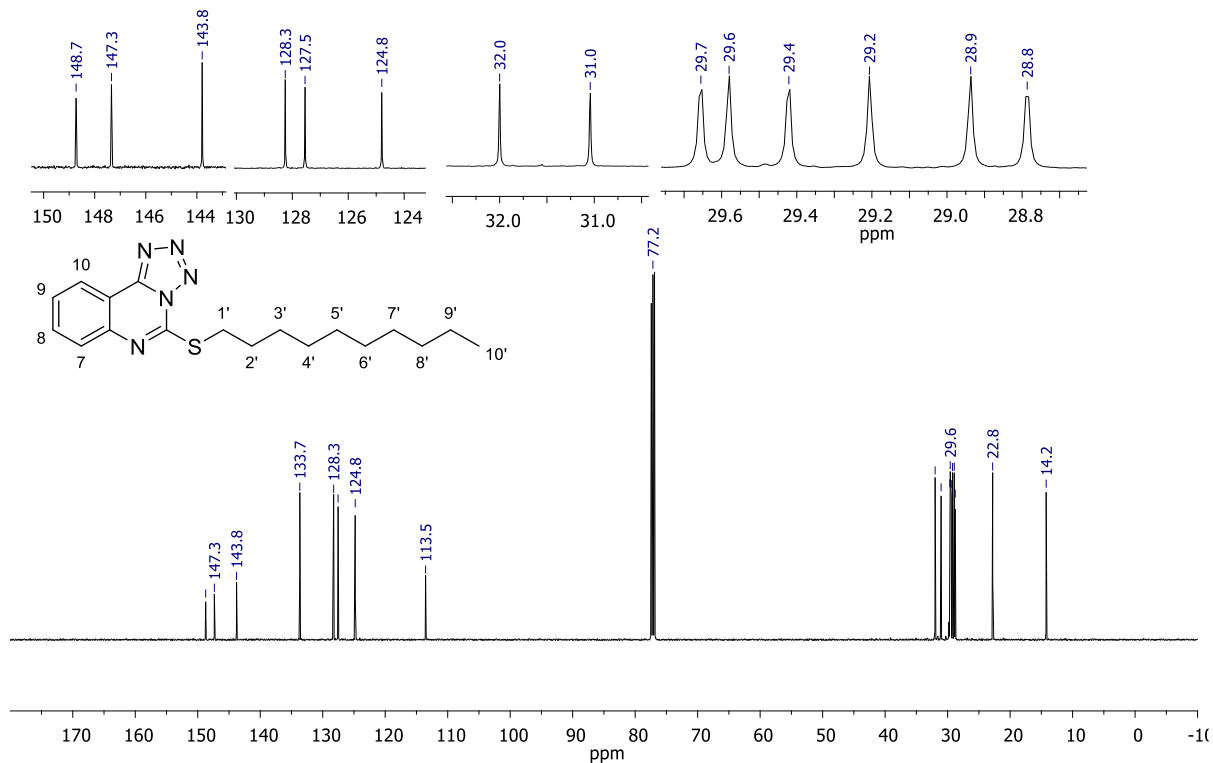

## 5-(Cyclohexylthio)tetrazolo[1,5-c]quinazoline(6b)

$^1\text{H-NMR}$  (500 MHz,  $\text{CDCl}_3$ ) spectrum of compound 6b:

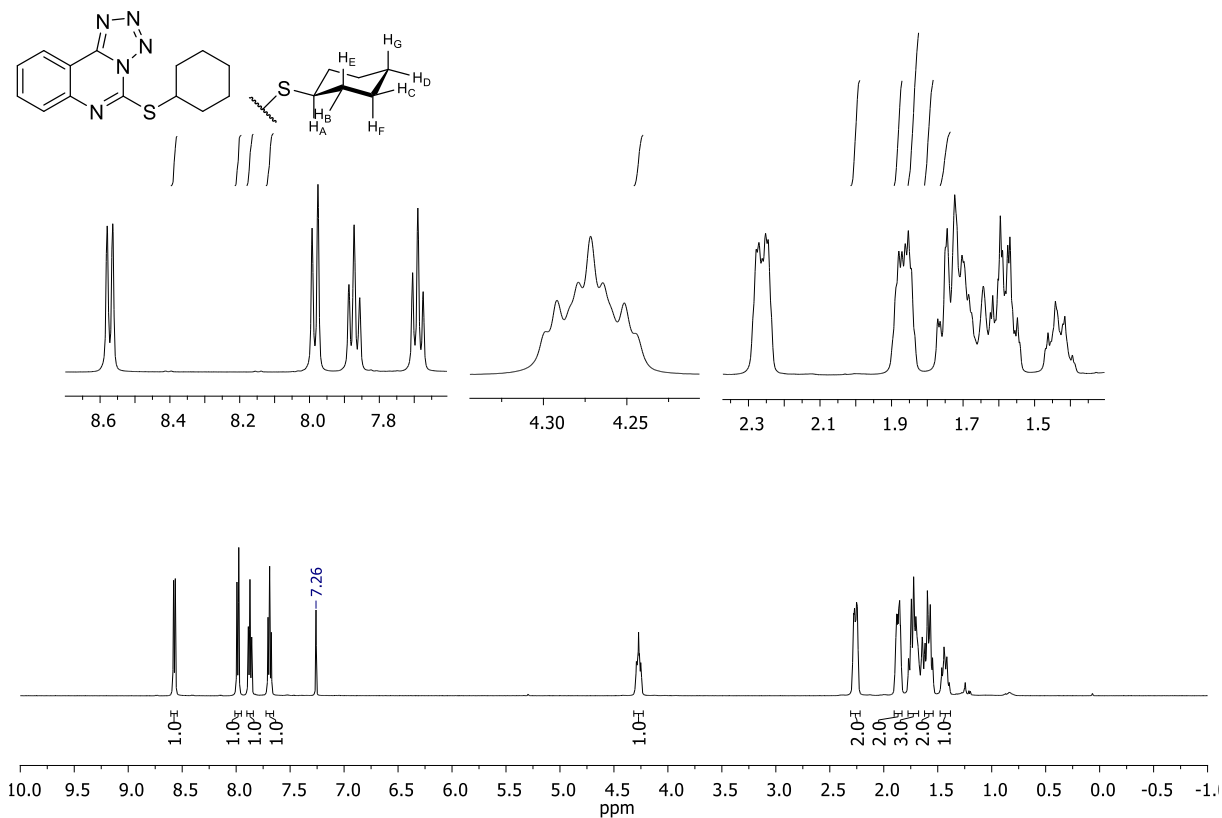

$^{13}\text{C-NMR}$  (125.7 MHz,  $\text{CDCl}_3$ ) spectrum of compound 6b:

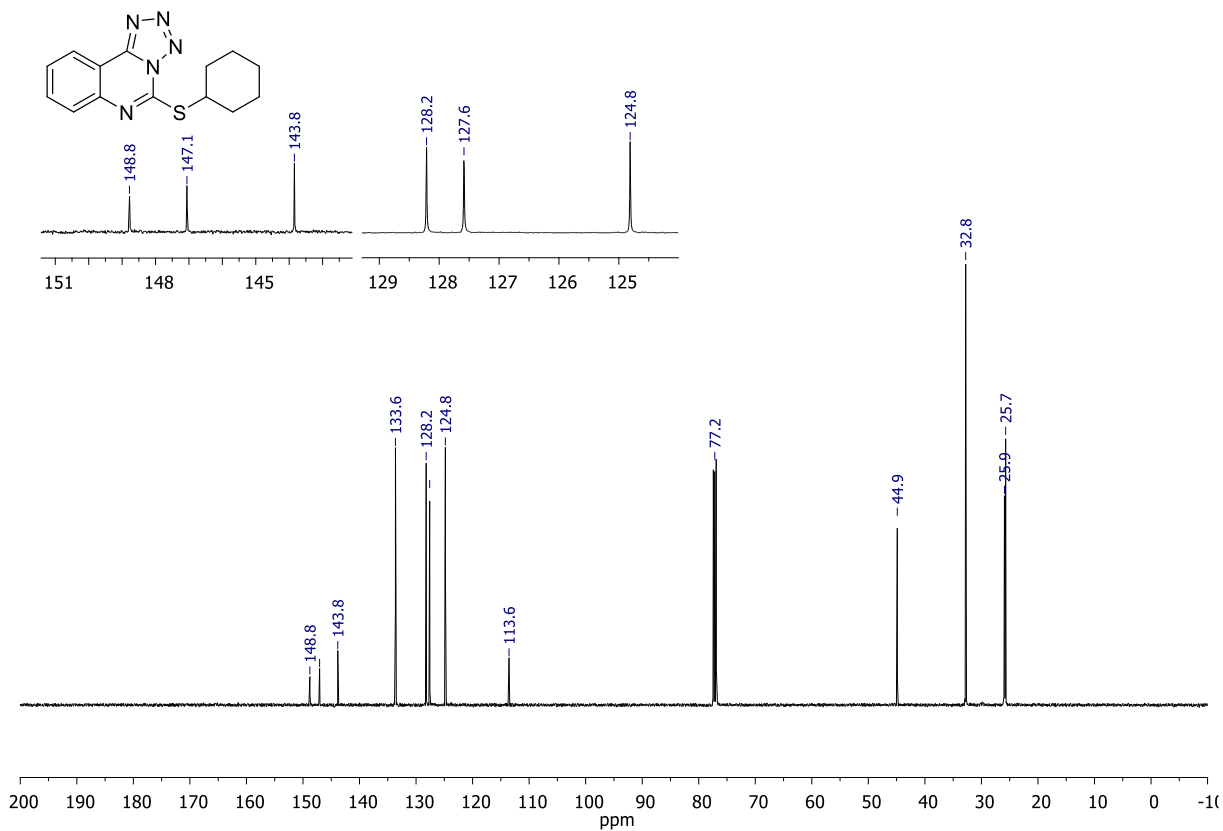

### 5-(Isopropylthio)tetrazolo[1,5-c]quinazoline (6c)

<sup>1</sup>H-NMR (500 MHz, CDCl<sub>3</sub>) spectrum of compound 6c:

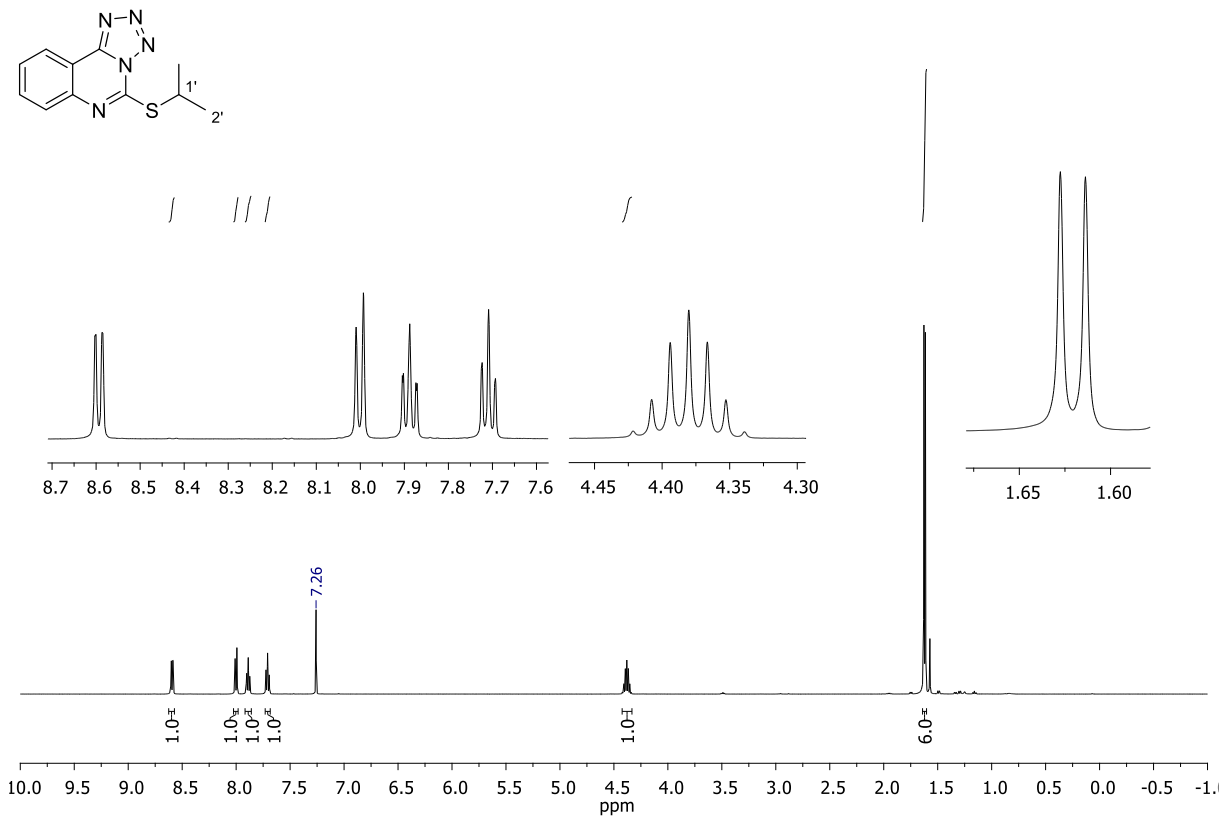

<sup>13</sup>C-NMR (125.7 MHz, CDCl<sub>3</sub>) spectrum of compound 6c:

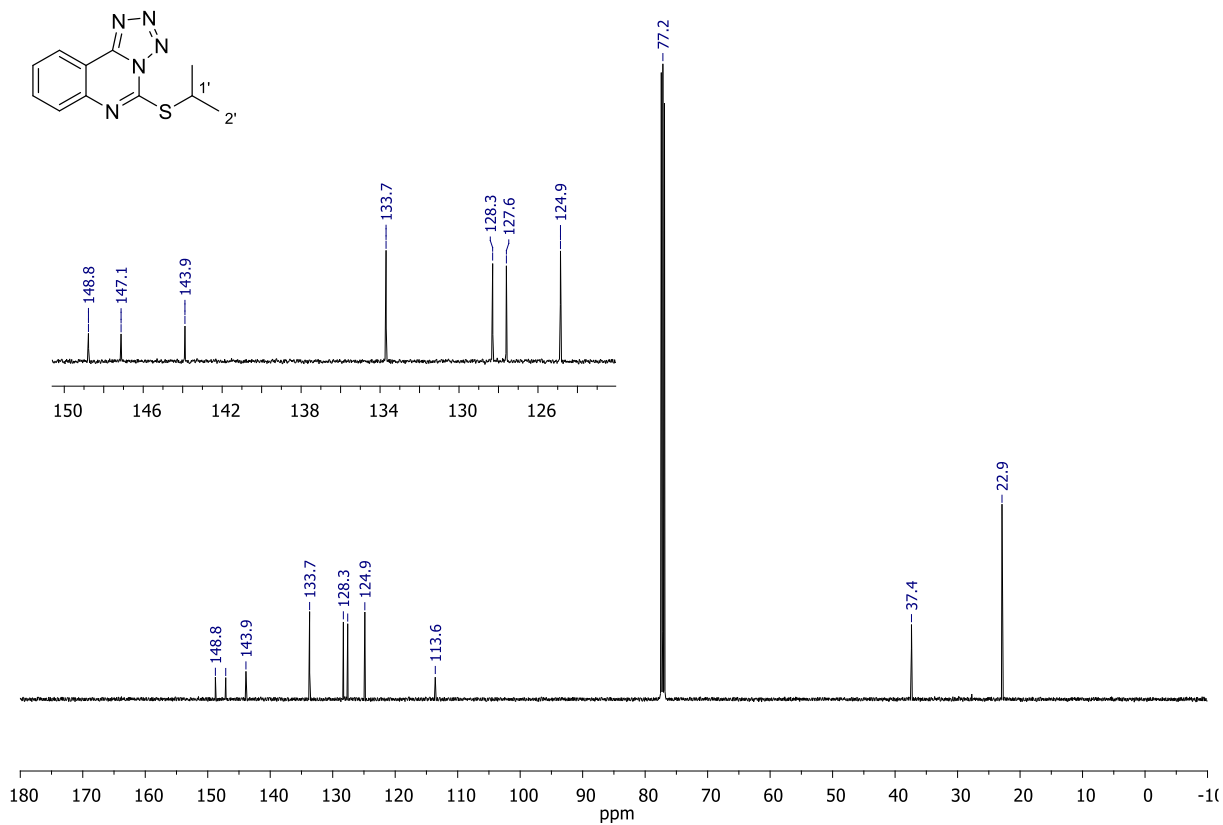

## Glutathione-tetrazolo[1,5-c]quinazoline conjugate 6d

$^1\text{H-NMR}$  (500 MHz,  $\text{CD}_3\text{COOD}$ ) spectrum of compound 6d:

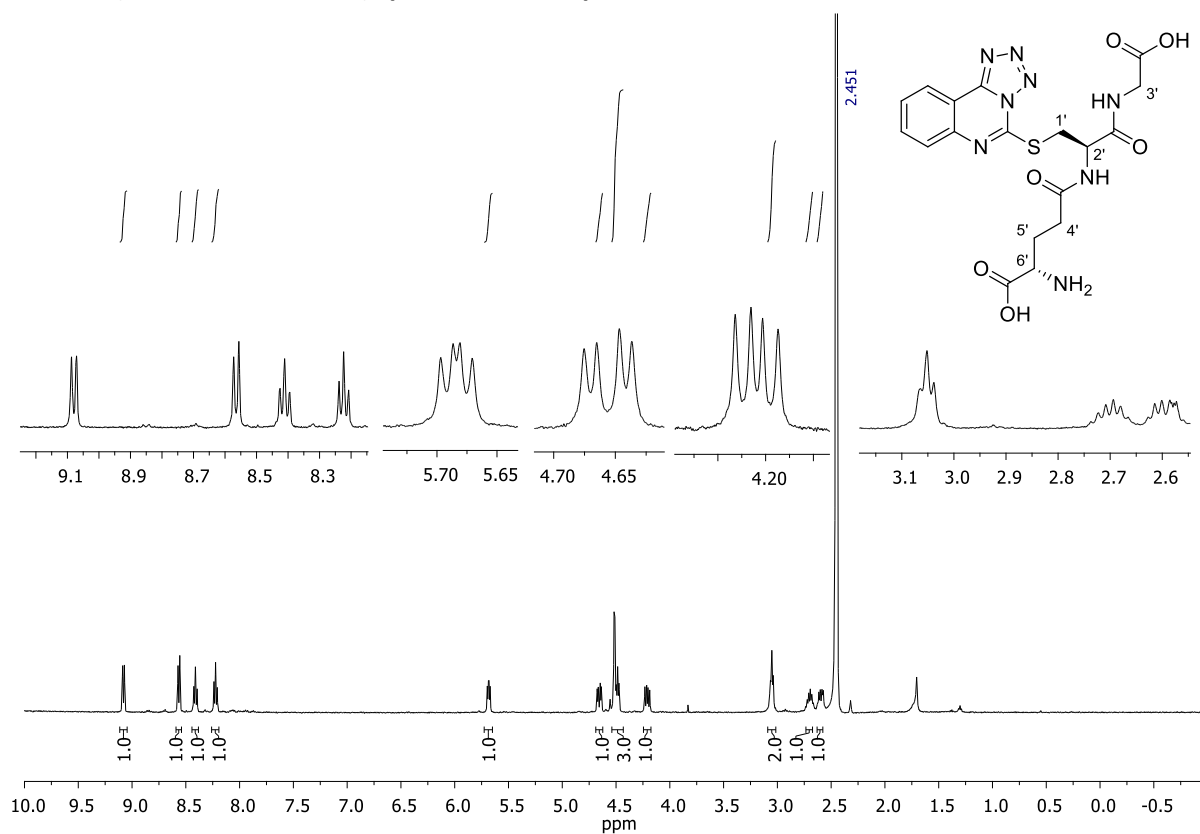

$^{13}\text{C-NMR}$  (125.7 MHz,  $\text{CD}_3\text{COOD}$ ) spectrum of compound 6d:

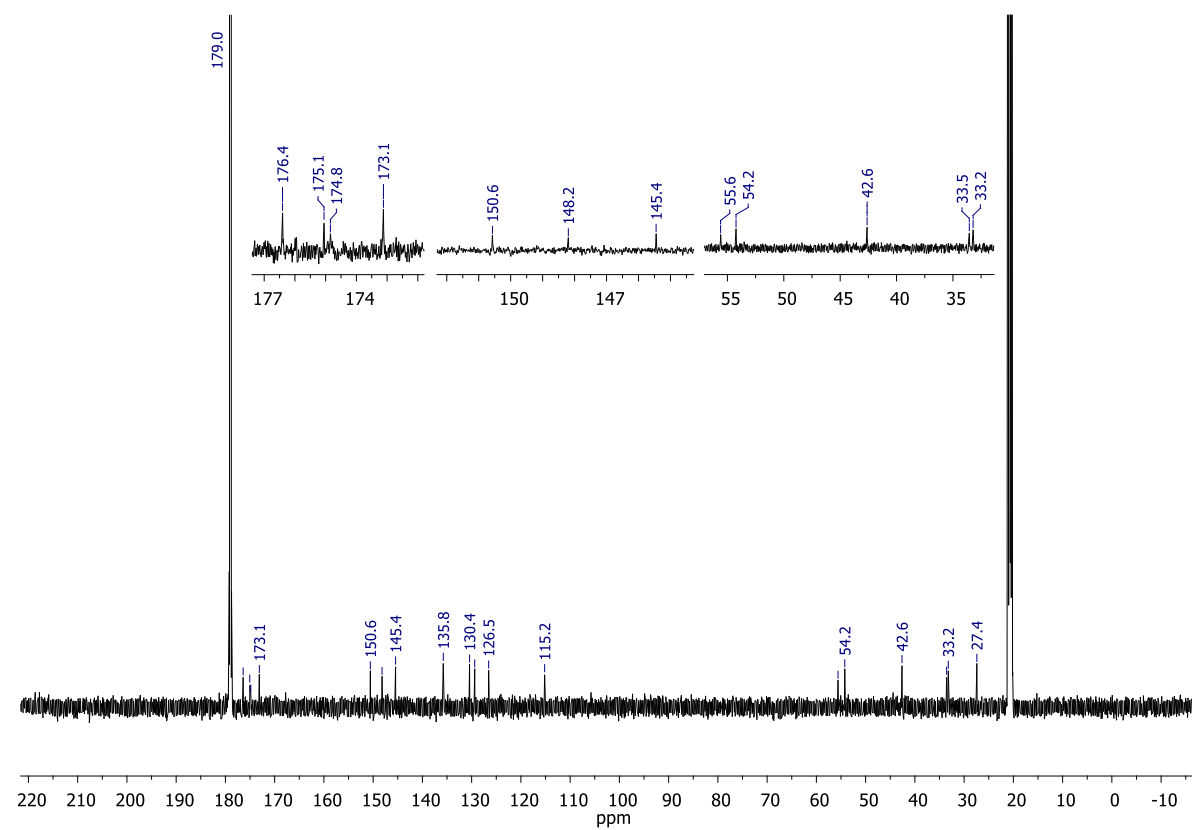



## 5-(Alkyloxy)tetrazolo[1,5-c]quinazolines

### 5-(Isopropoxy)tetrazolo[1,5-c]quinazoline (7a)

$^1\text{H-NMR}$  (500 MHz,  $\text{CDCl}_3$ ) spectrum of compound 7a:

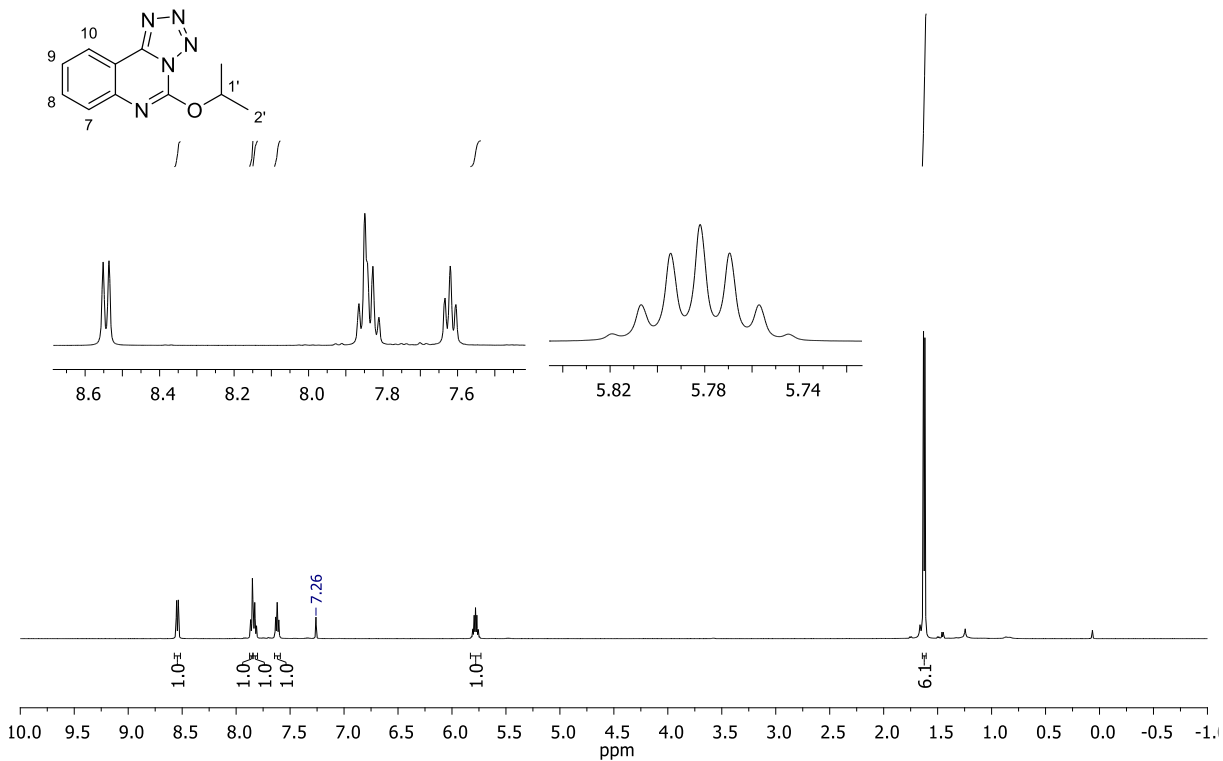

$^{13}\text{C-NMR}$  (125.7 MHz,  $\text{CDCl}_3$ ) spectrum of compound 7a:

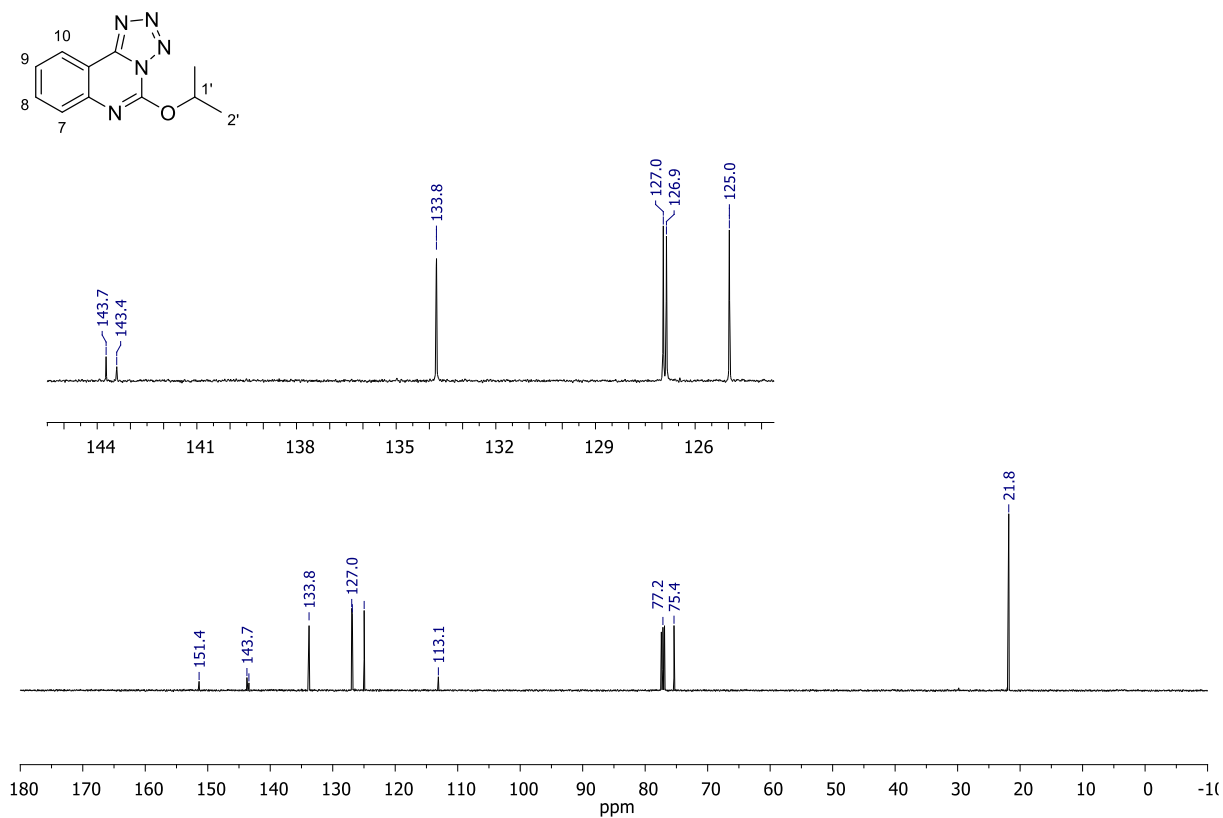

HSQC spectrum of compound 7a:

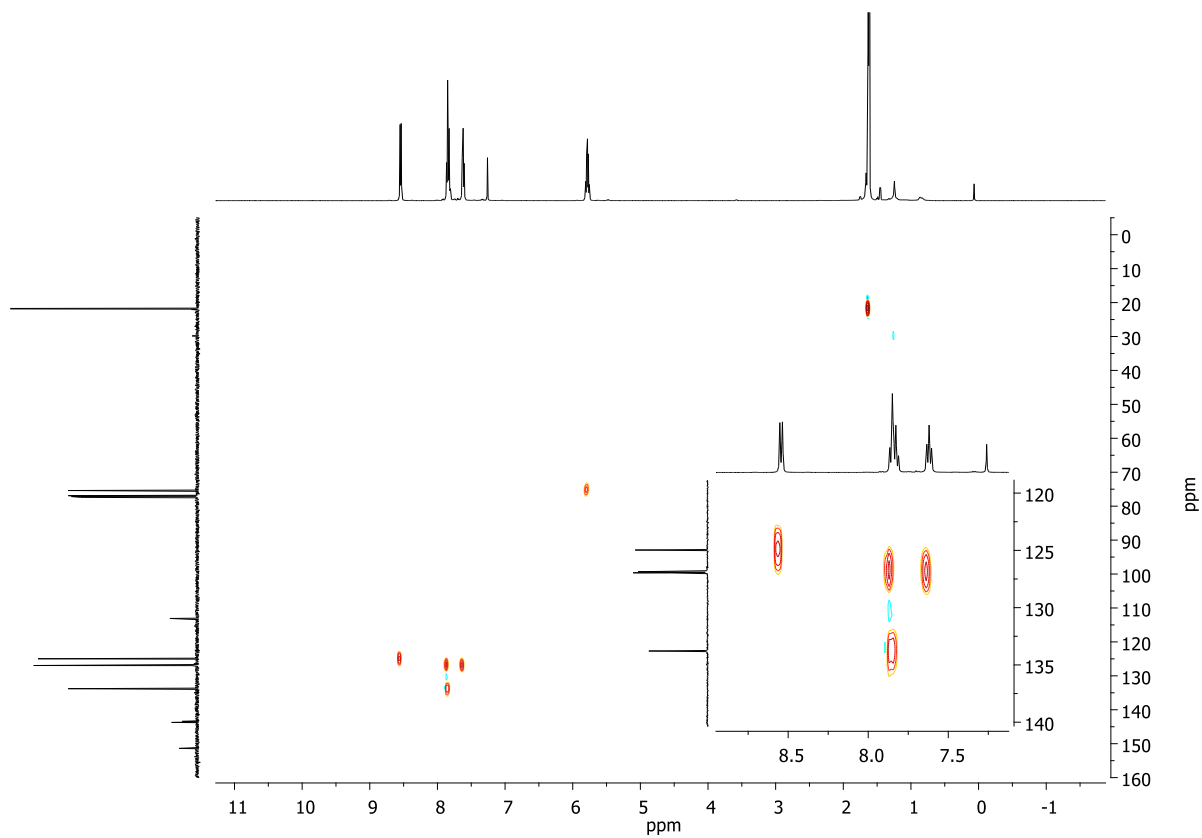

HMBC spectrum of compound 7a:

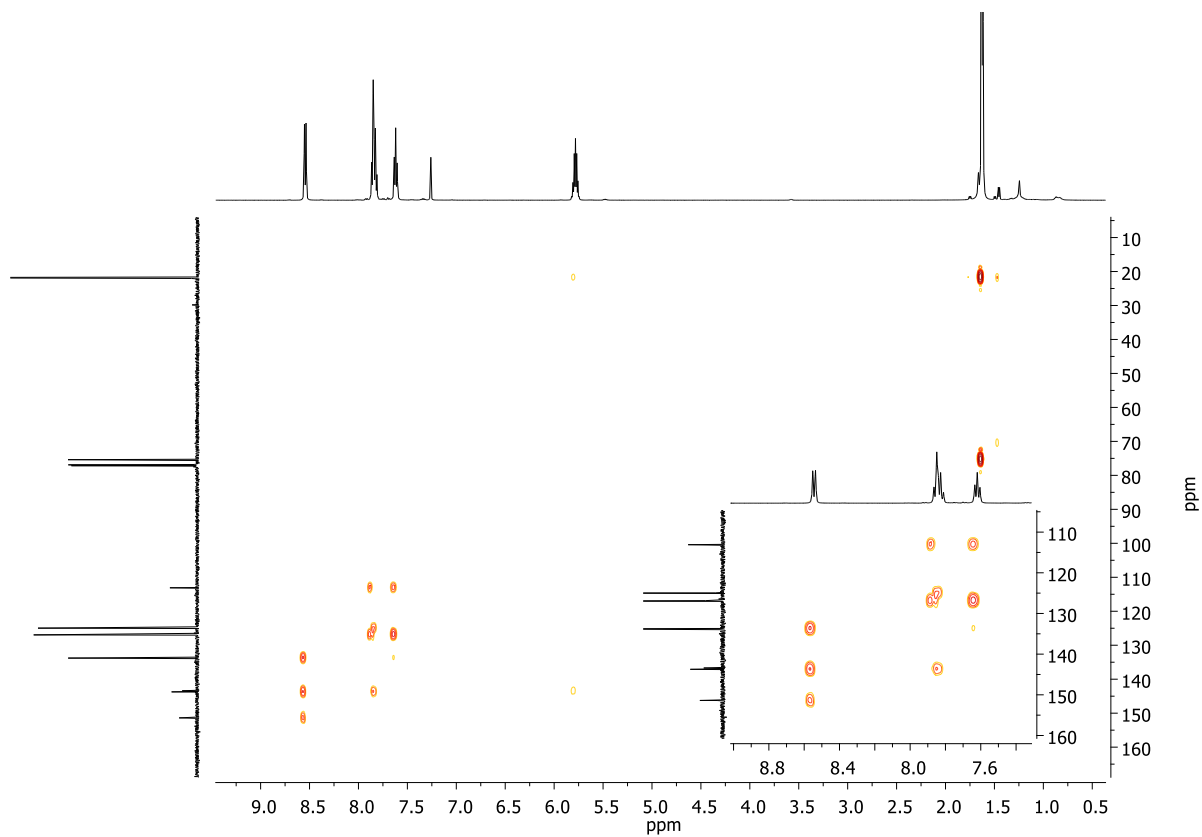

COSY spectrum of compound 7a:

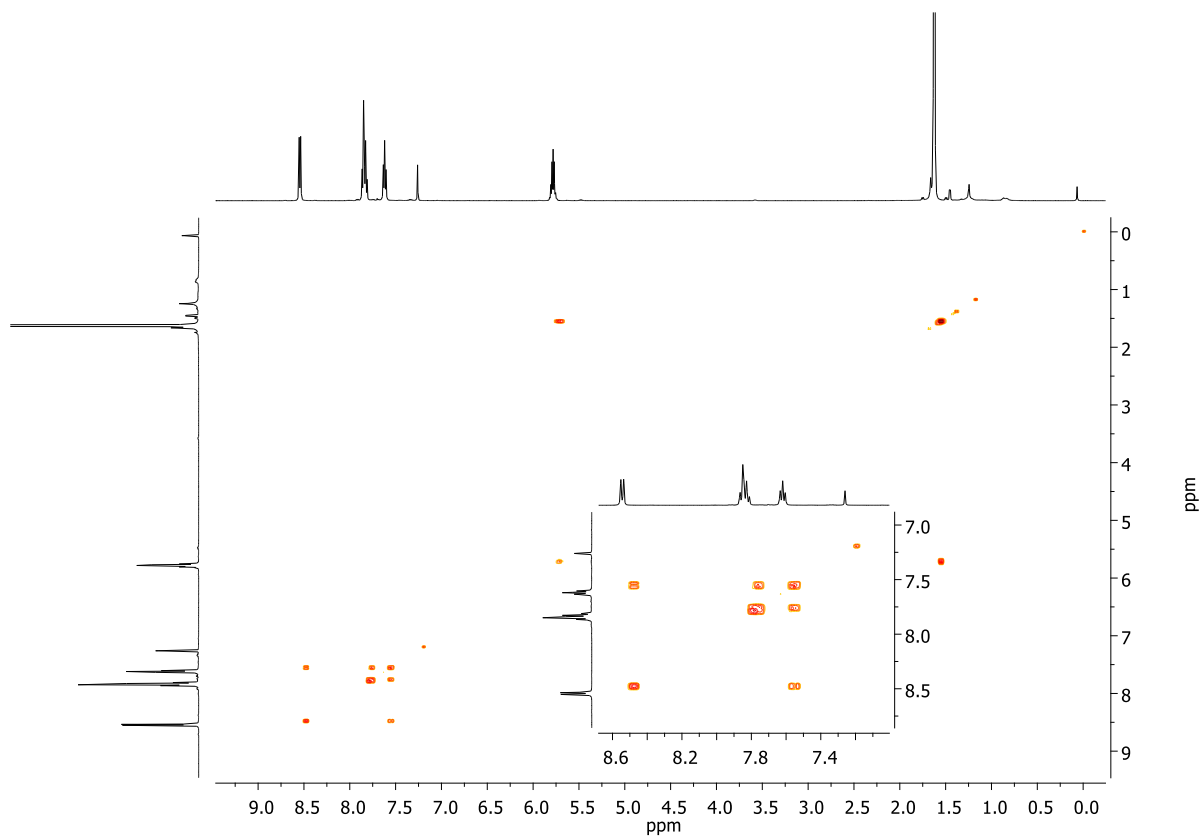

5-(Cyclopentyloxy)tetrazolo[1,5-c]quinazoline (7b)

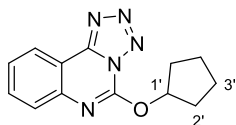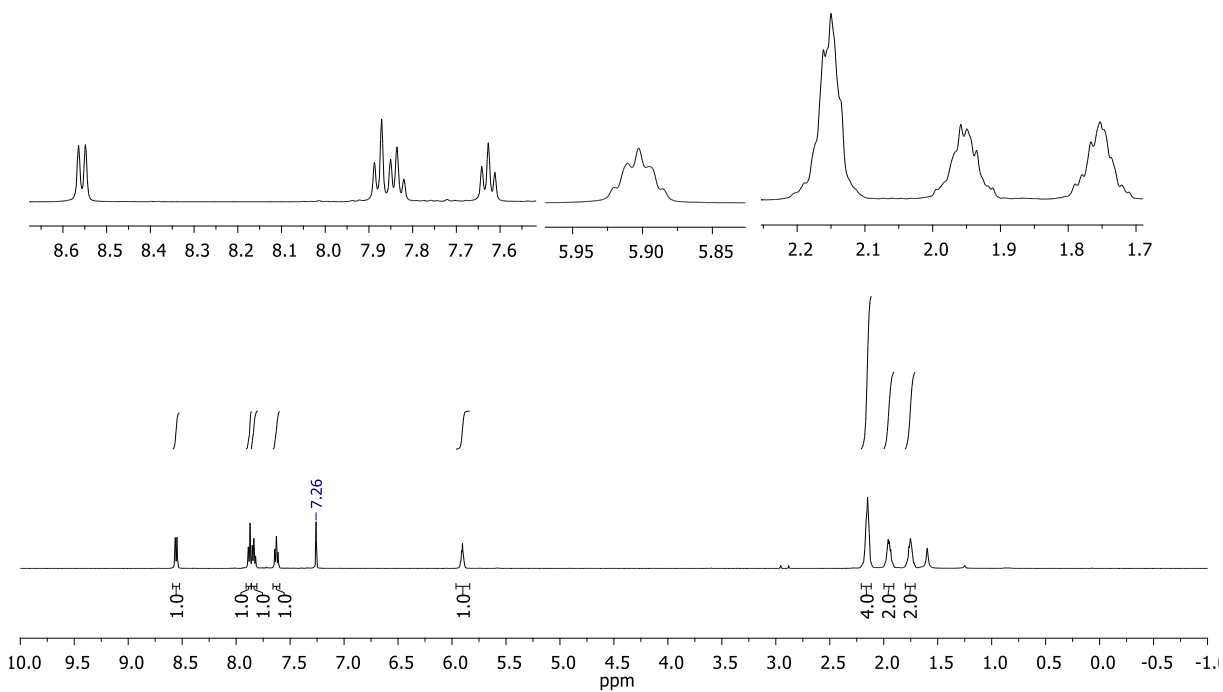

**<sup>13</sup>C-NMR (125.7 MHz, CDCl<sub>3</sub>) spectrum of compound 7b:**

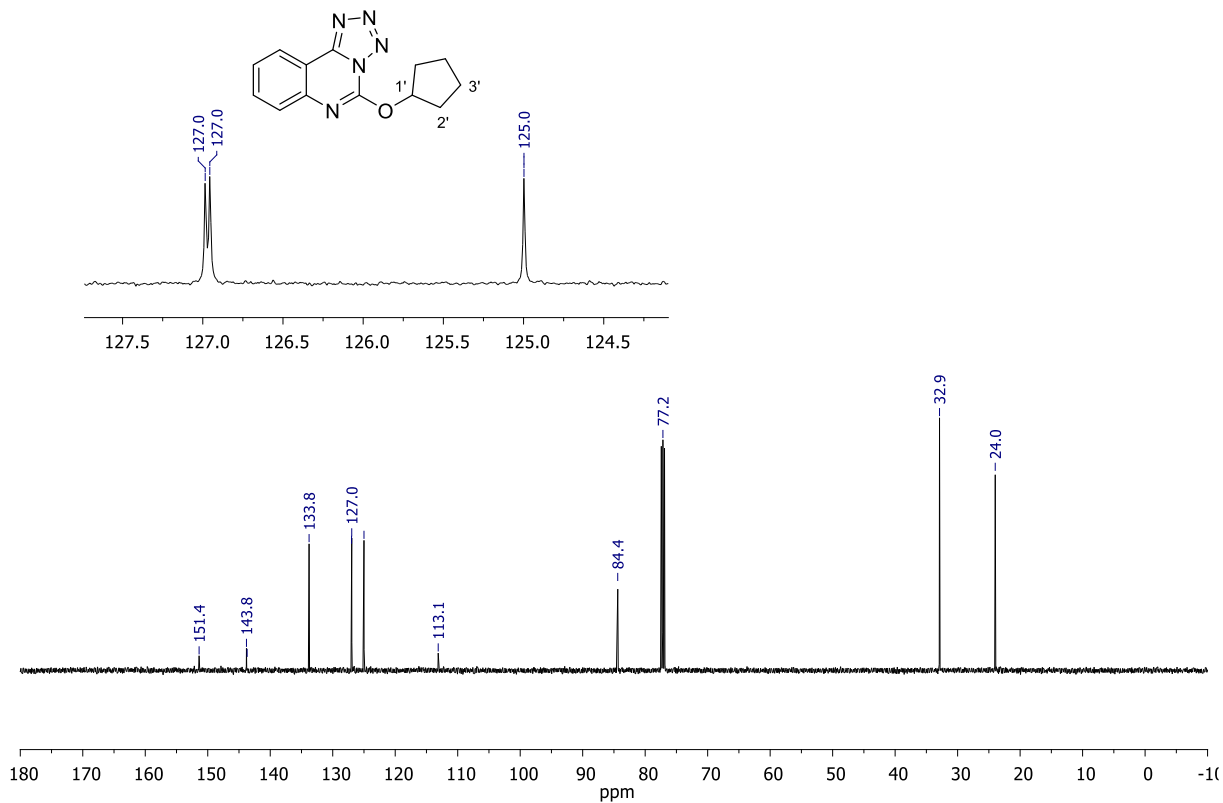

**HSQC spectrum of compound 7b:**

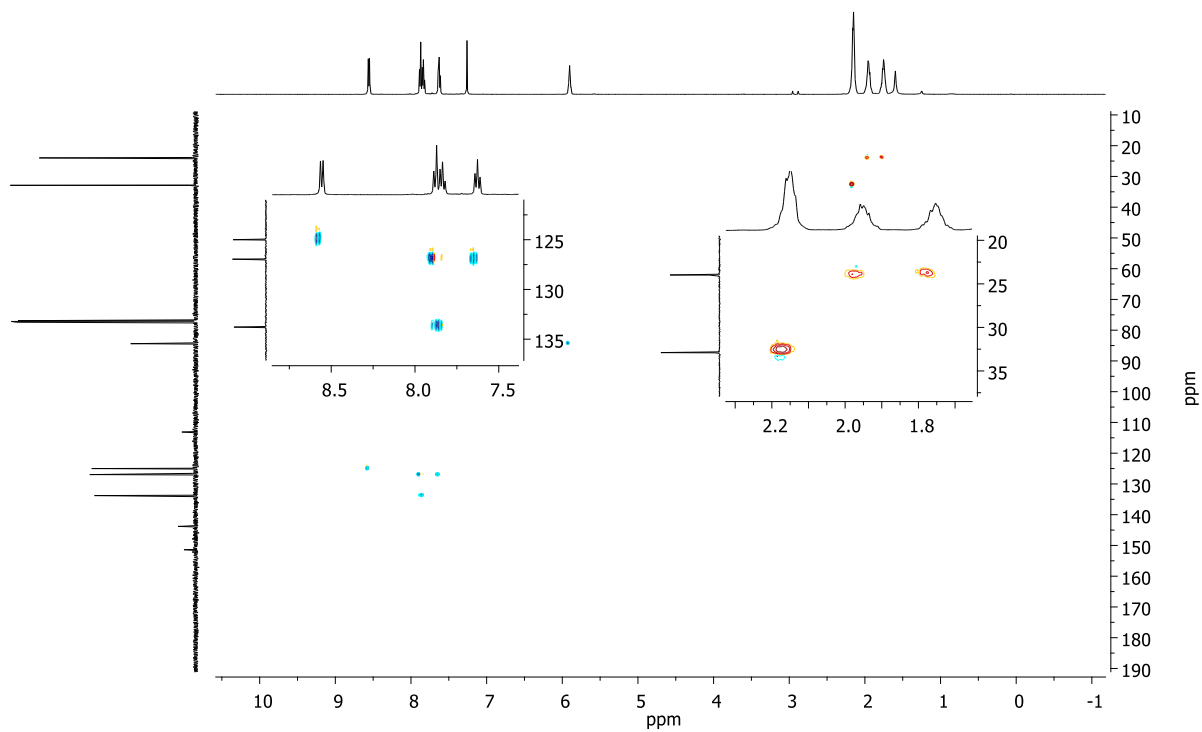

## Diacetone glucose-quinazoline conjugate 7c

$^1\text{H-NMR}$  (500 MHz,  $\text{DMSO-d}_6$ ) spectrum of compound 7c:

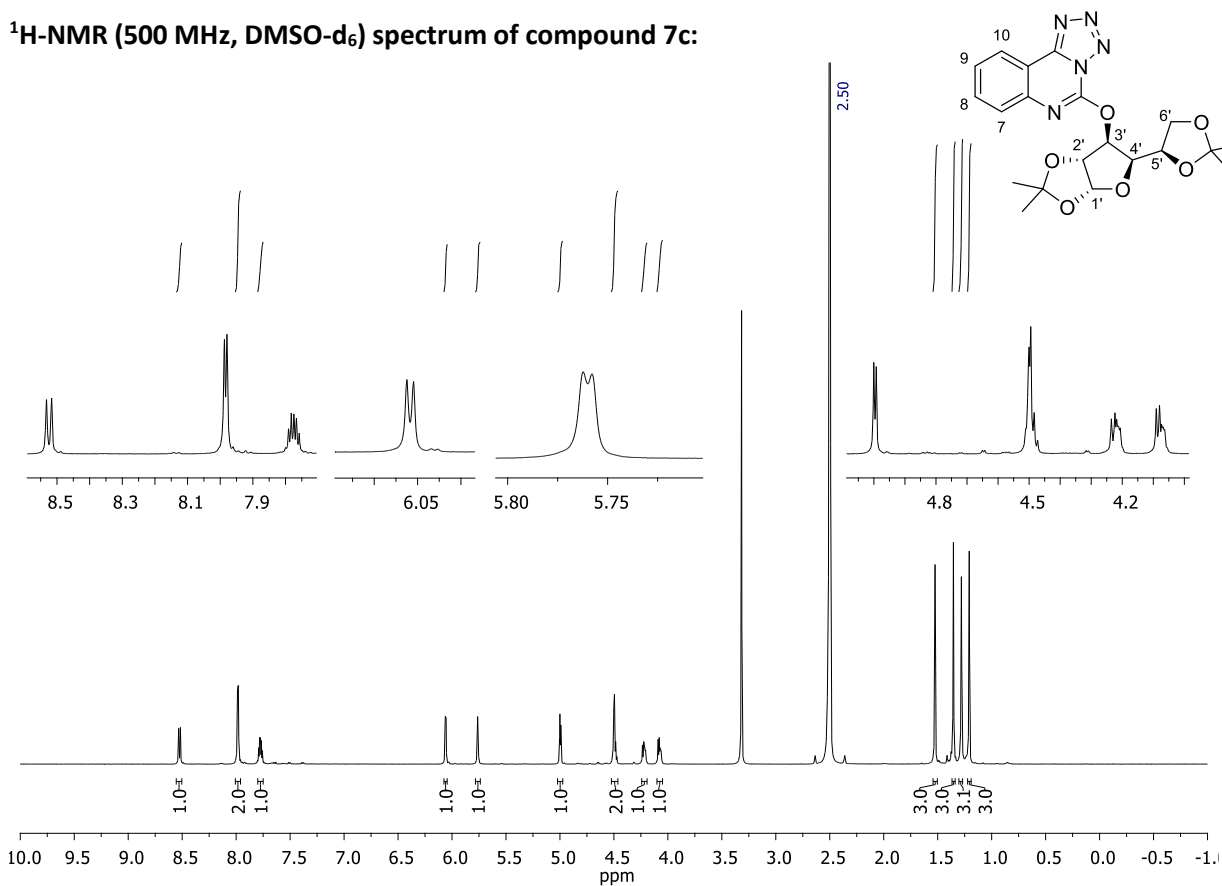

$^{13}\text{C-NMR}$  (125.7 MHz,  $\text{DMSO-d}_6$ ) spectrum of compound 7c:

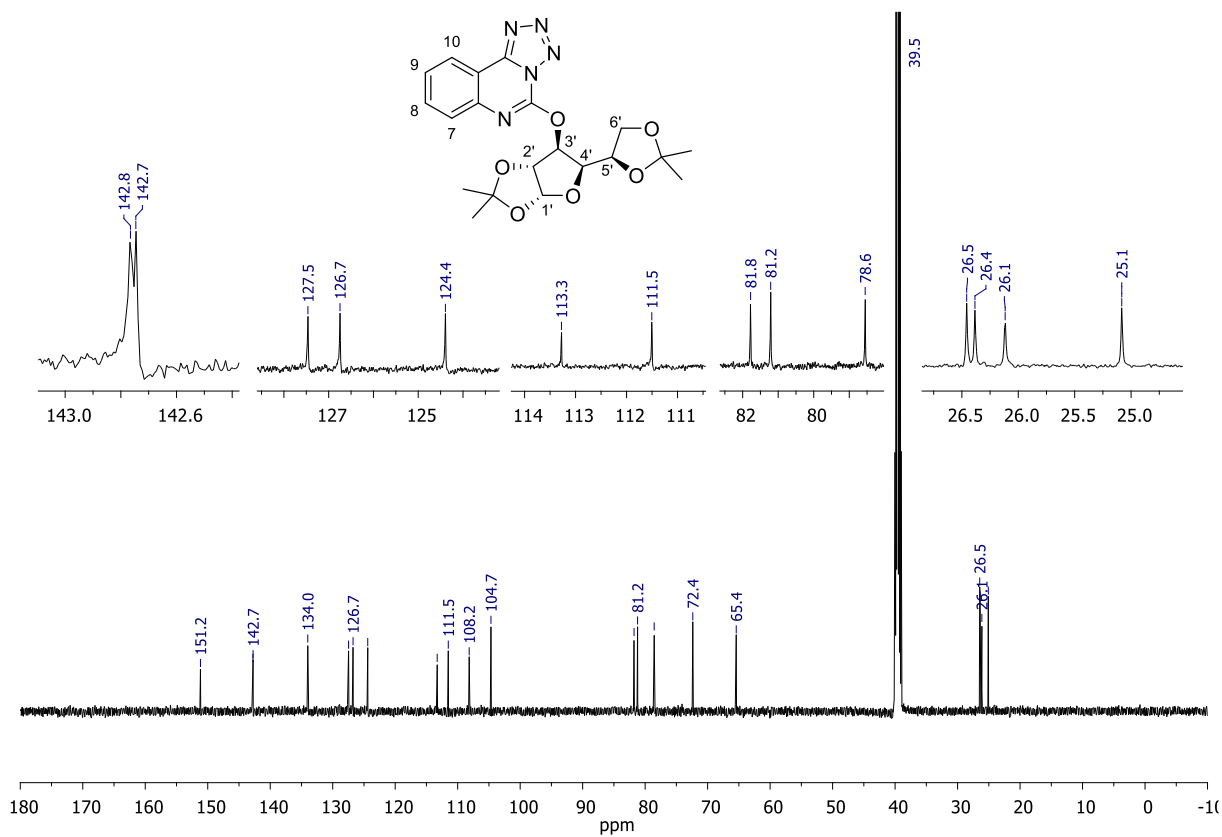

HSQC spectrum of compound 7c:

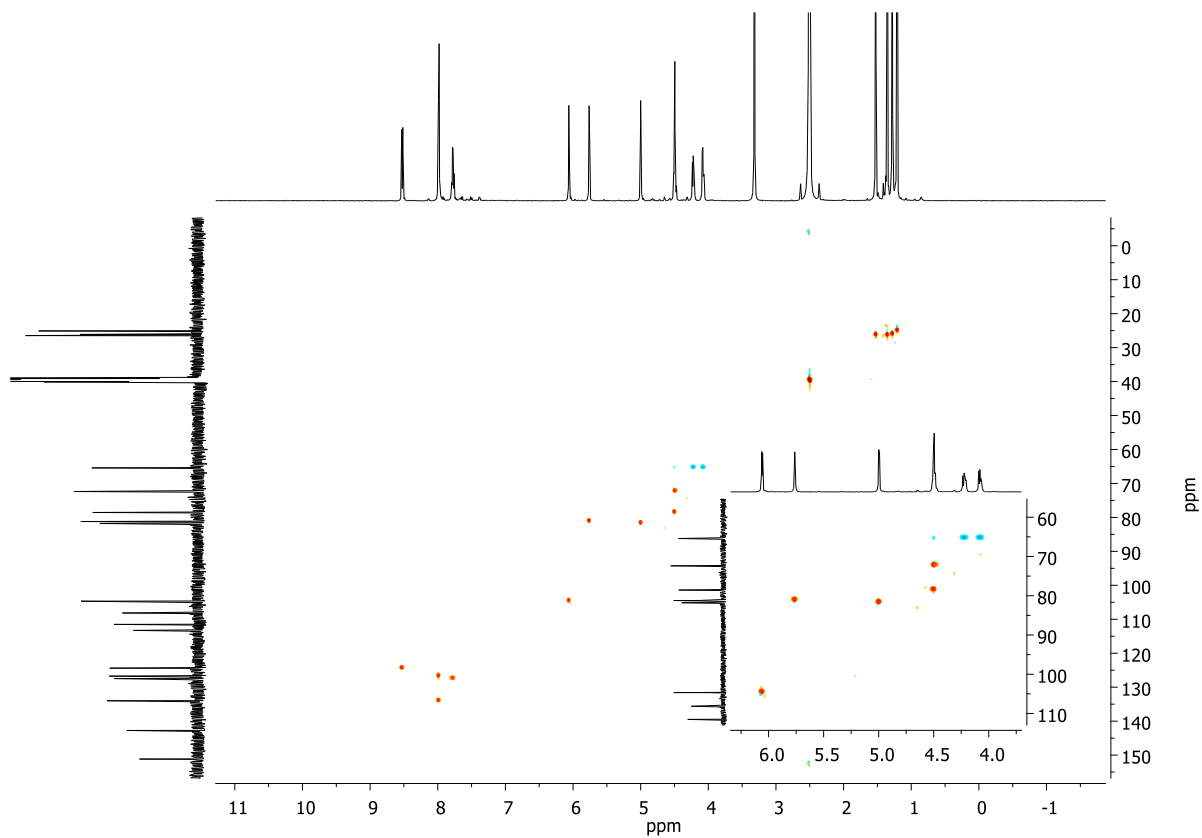

HMBC spectrum of compound 7c:

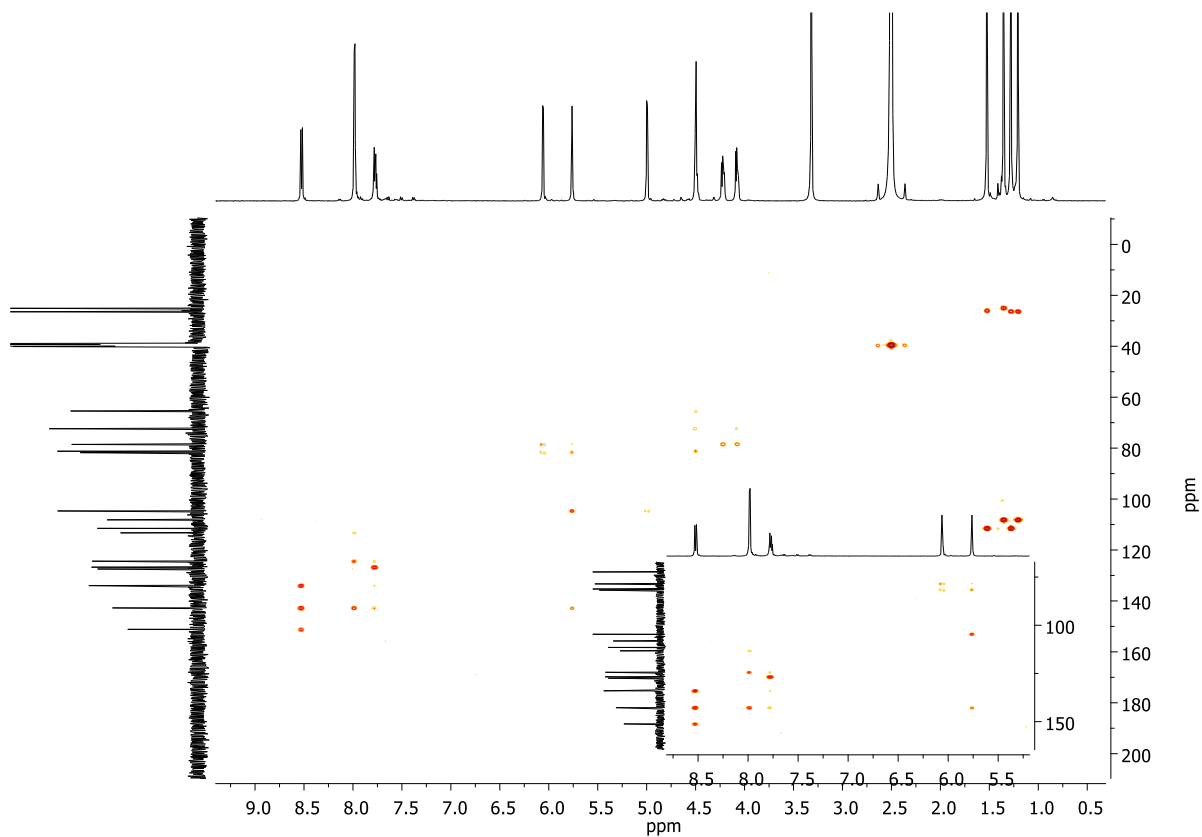

COSY spectrum of compound 7c:

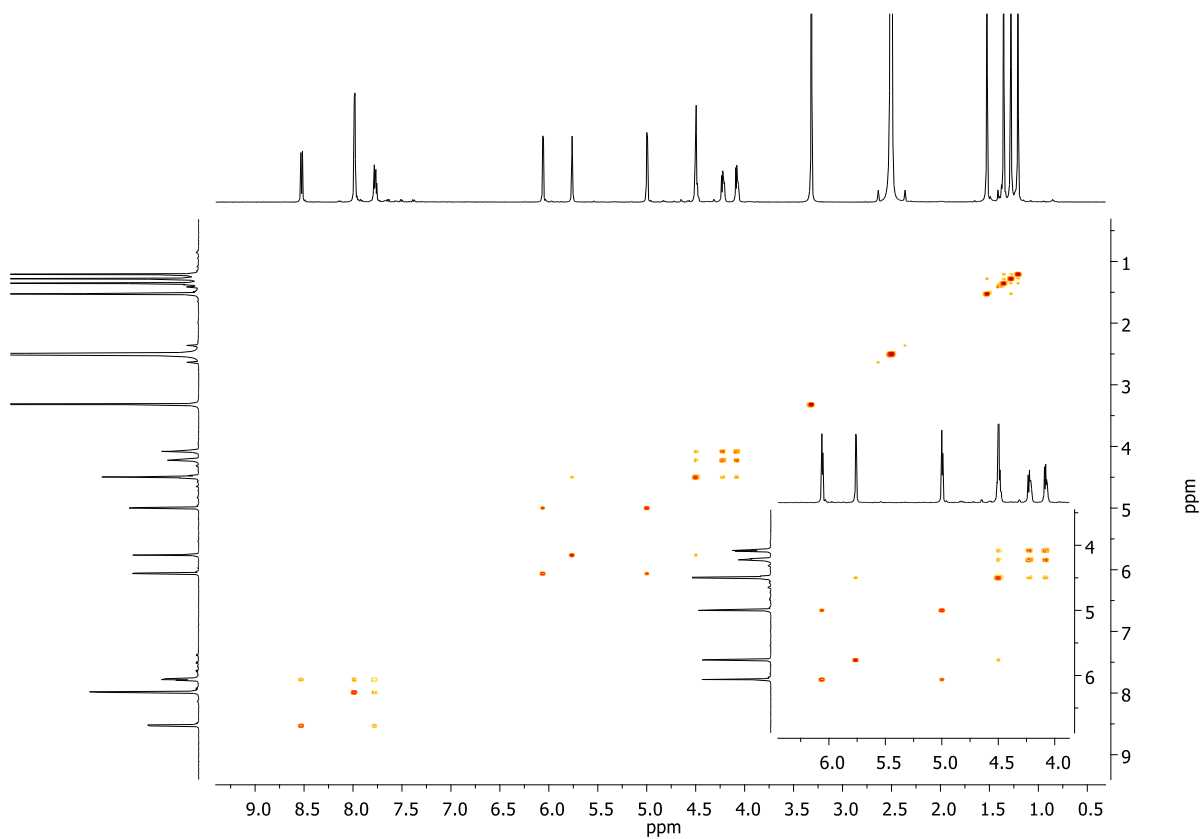

## 5-(Alkyloxy)tetrazolo[1,5-*a*]quinazolines

### 5-(Benzyloxy)tetrazolo[1,5-*a*]quinazoline (9a)

<sup>1</sup>H-NMR (500 MHz, CDCl<sub>3</sub>) spectrum of compound 9a:

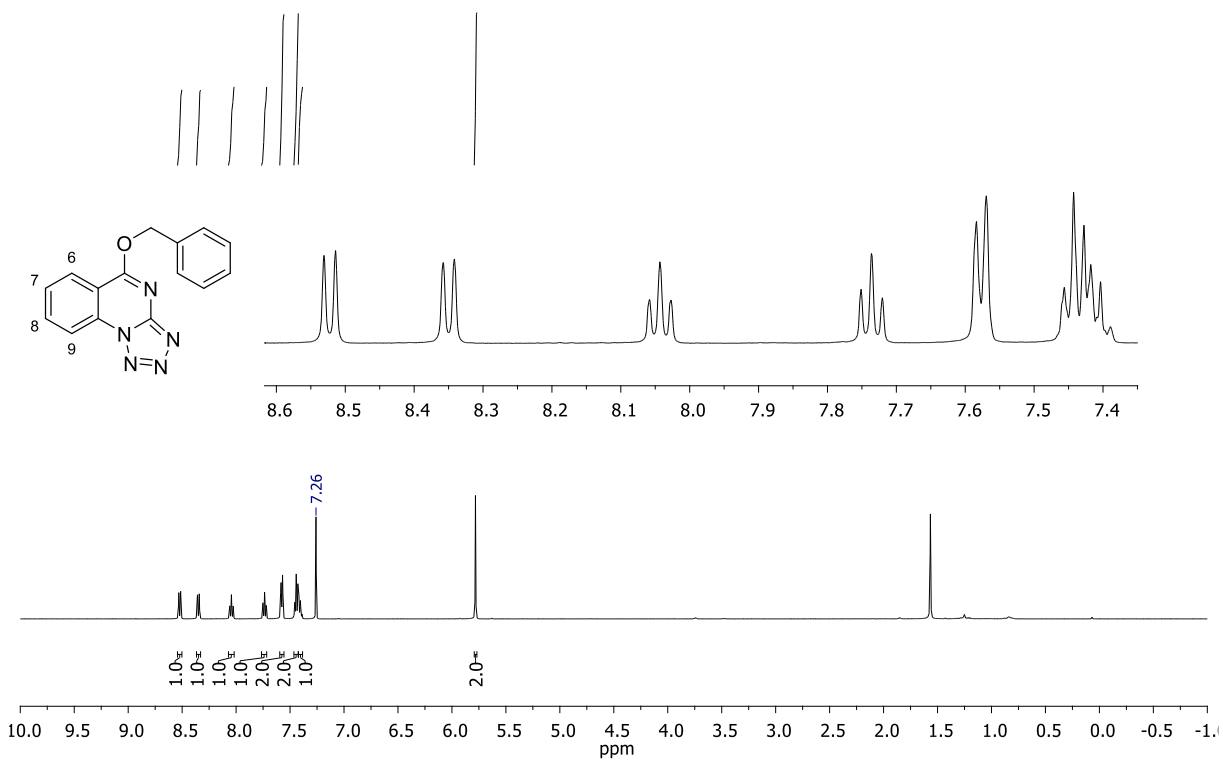

<sup>13</sup>C-NMR (125.7 MHz, CDCl<sub>3</sub>) spectrum of compound 9a:

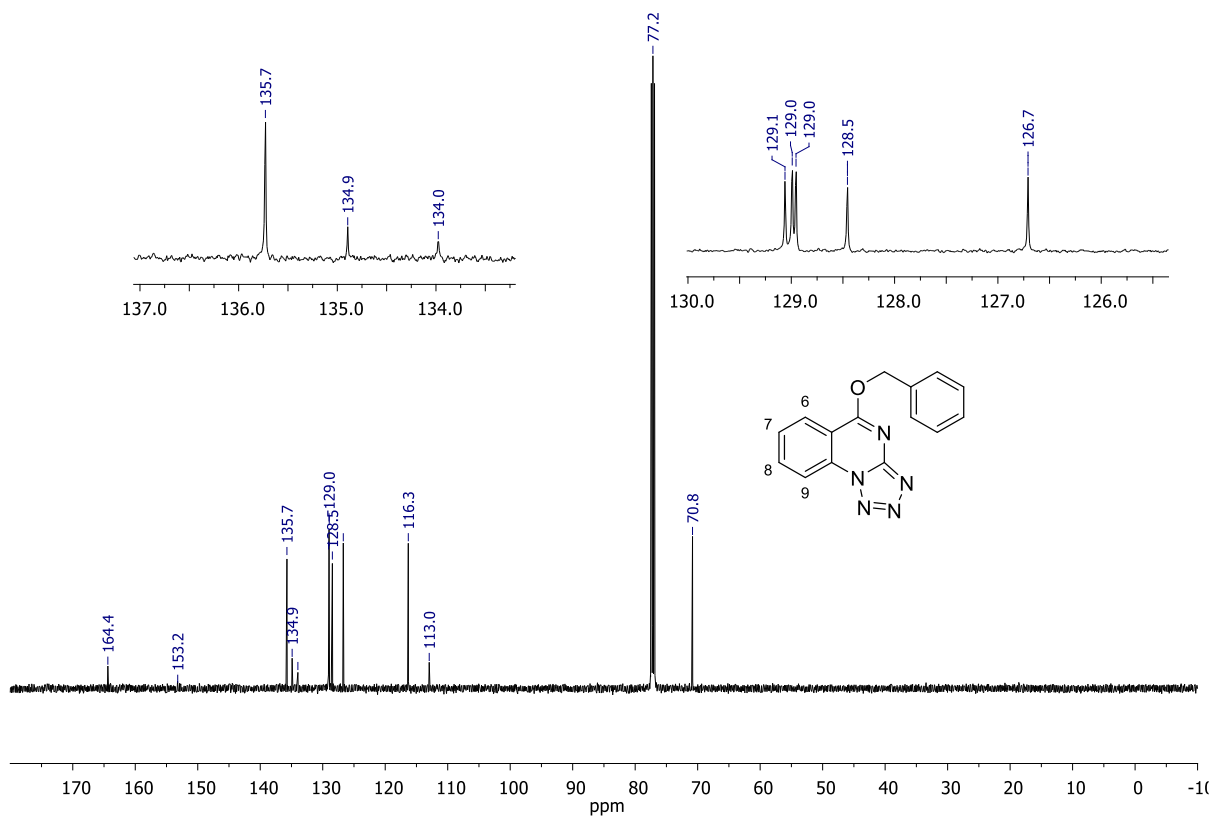



HSQC spectrum of compound 9a:

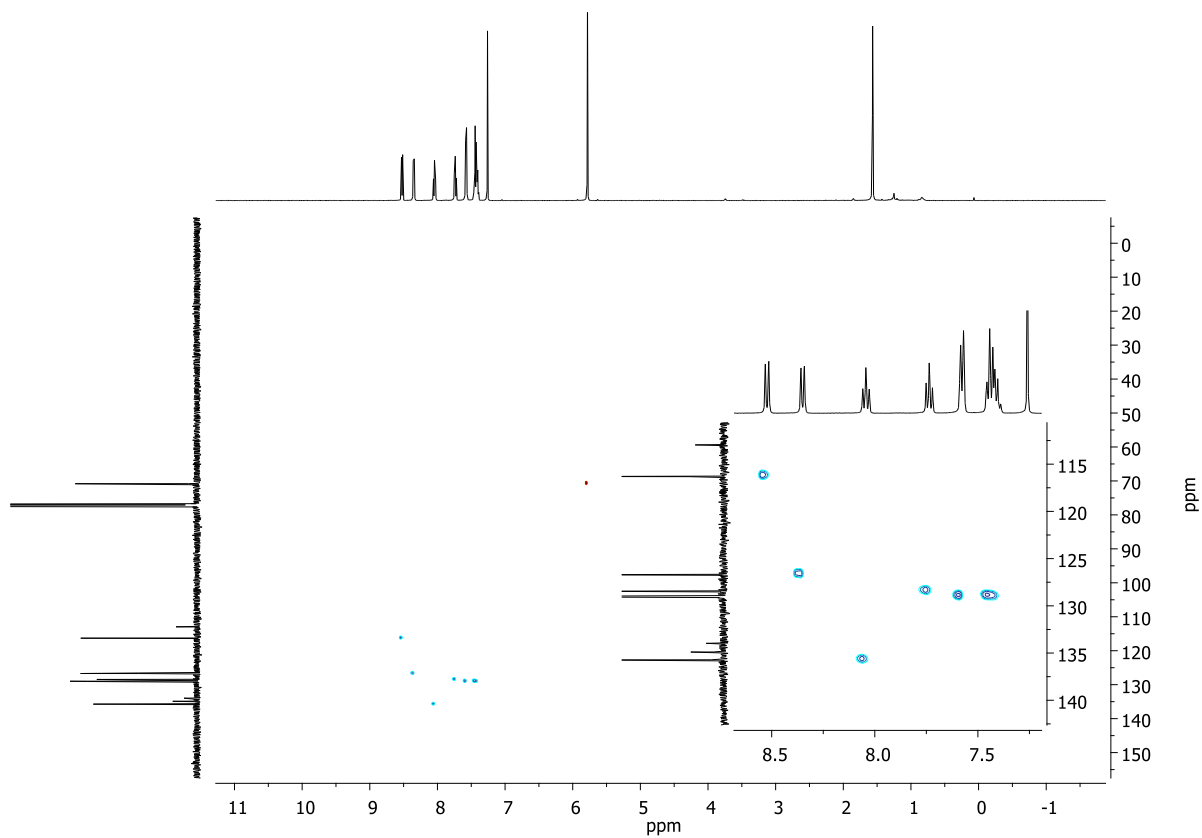

HMBC spectrum of compound 9a:

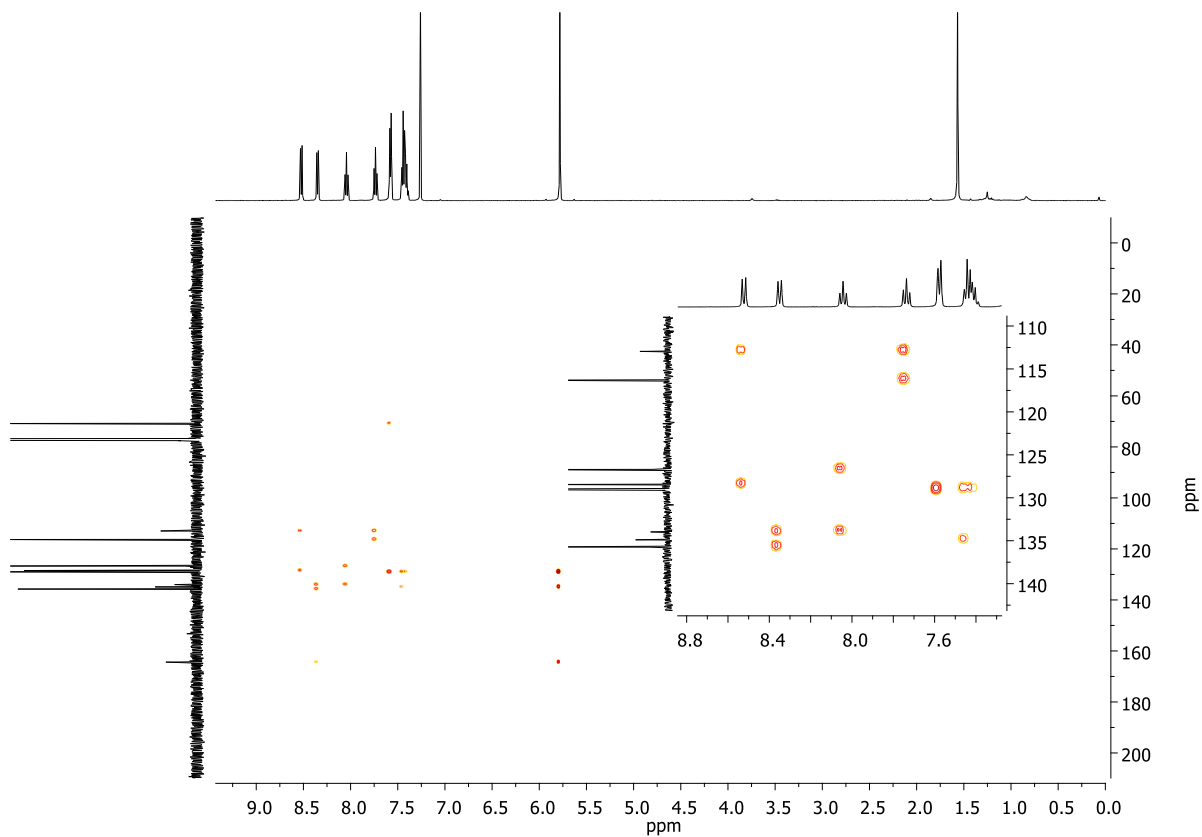

COSY spectrum of compound 9a:

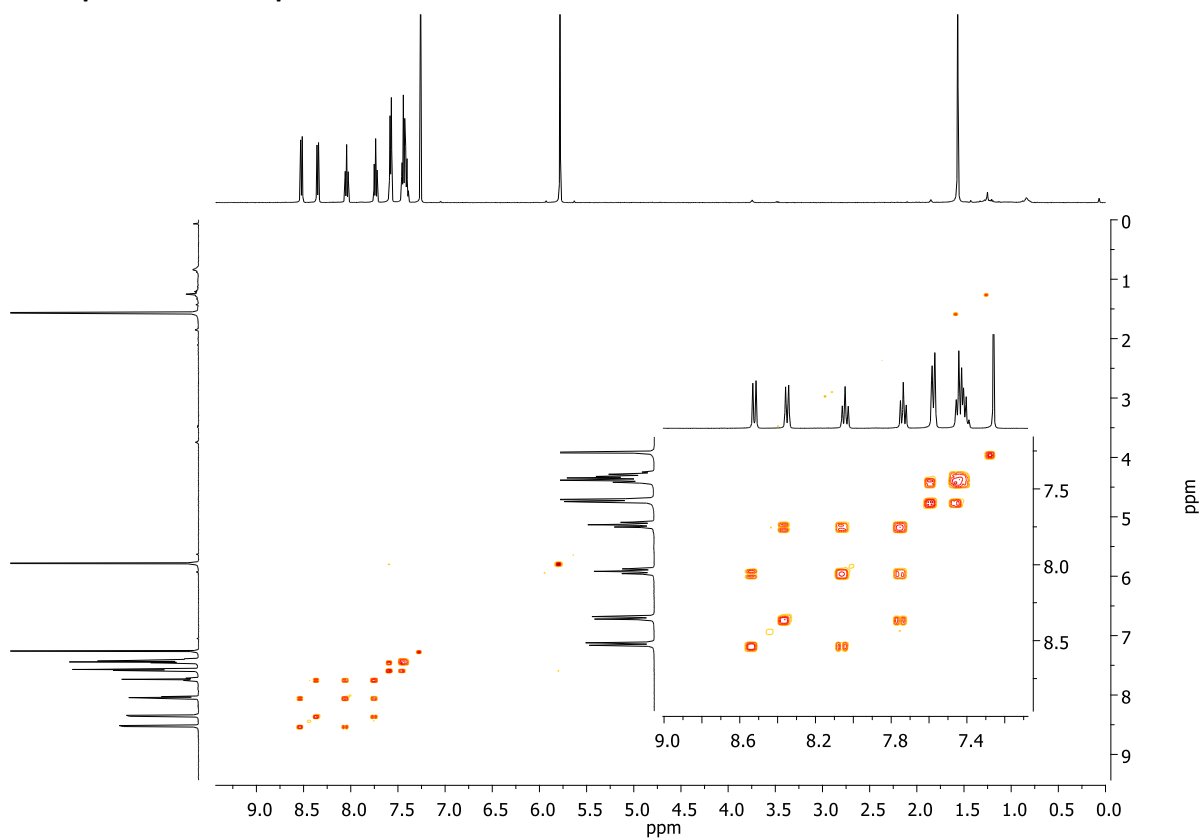

## 4-(Arylthio)-2-(piperidiny)quinazolines

### 4-[(4-Chlorophenyl)thio]-2-(piperidin-1-yl)quinazoline (5a)

$^1\text{H-NMR}$  (500 MHz,  $\text{DMSO-d}_6$ ) spectrum of compound 5a:

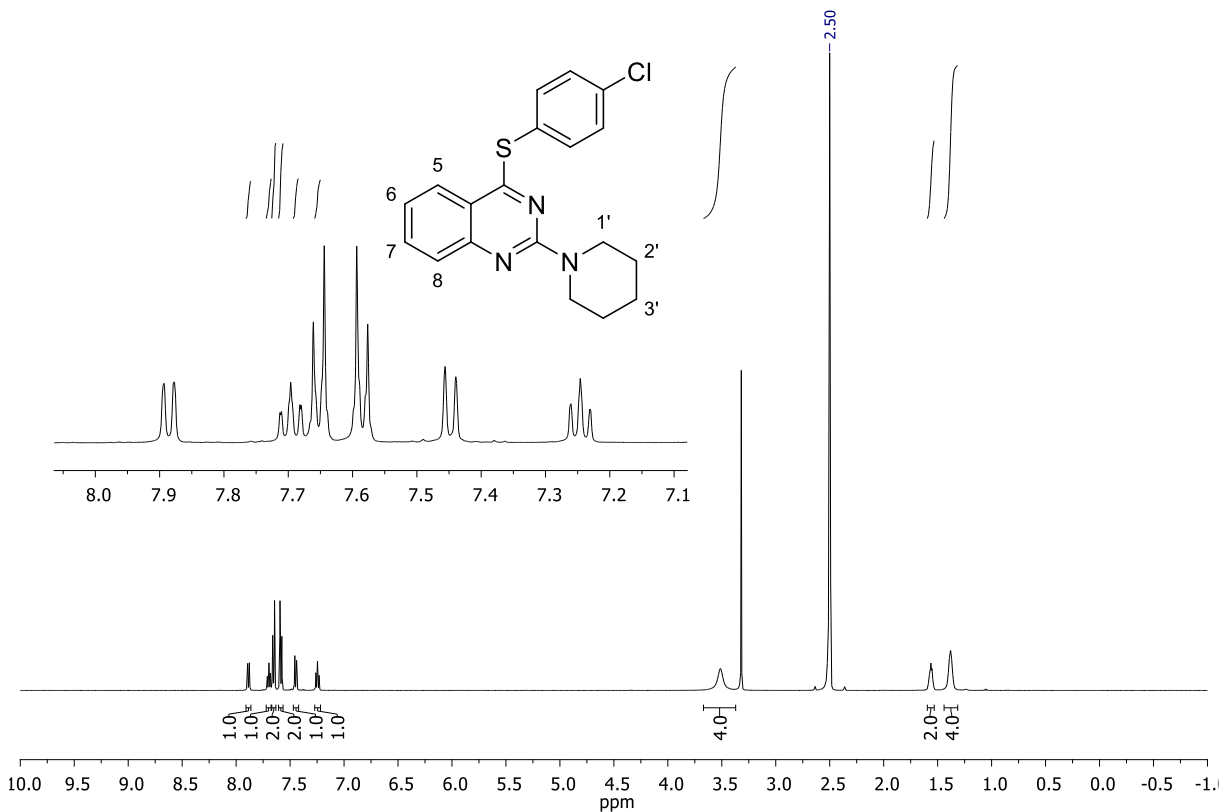

$^{13}\text{C-NMR}$  (125.7 MHz,  $\text{DMSO-d}_6$ ) spectrum of compound 5a:

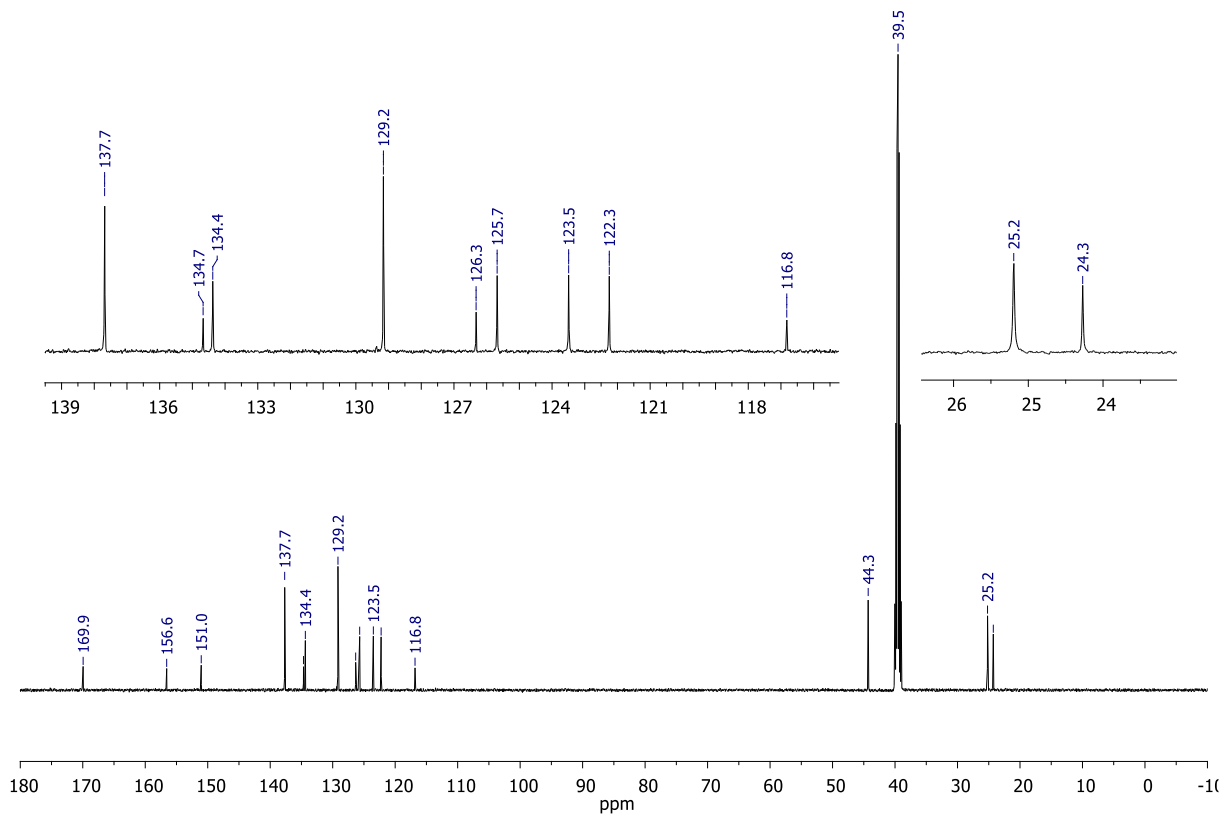

HSQC spectrum of compound 5a:

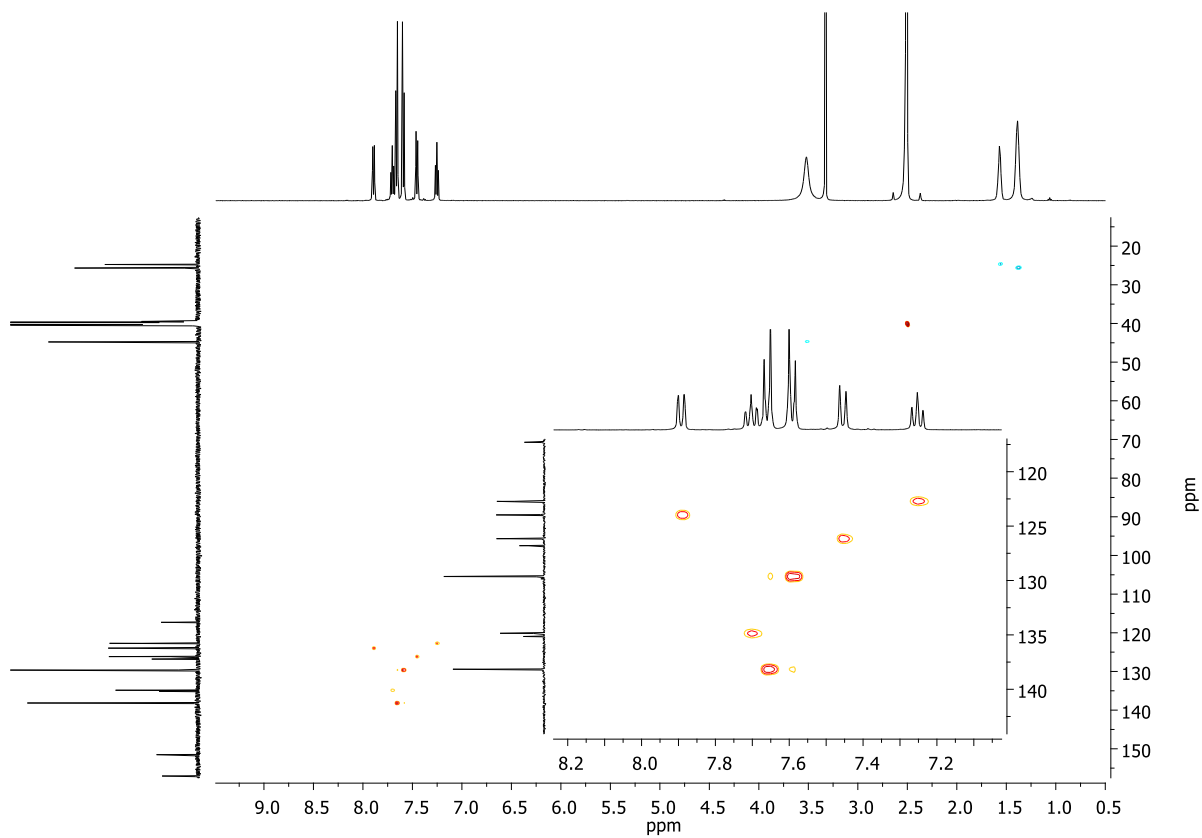

HMBC spectrum of compound 5a:

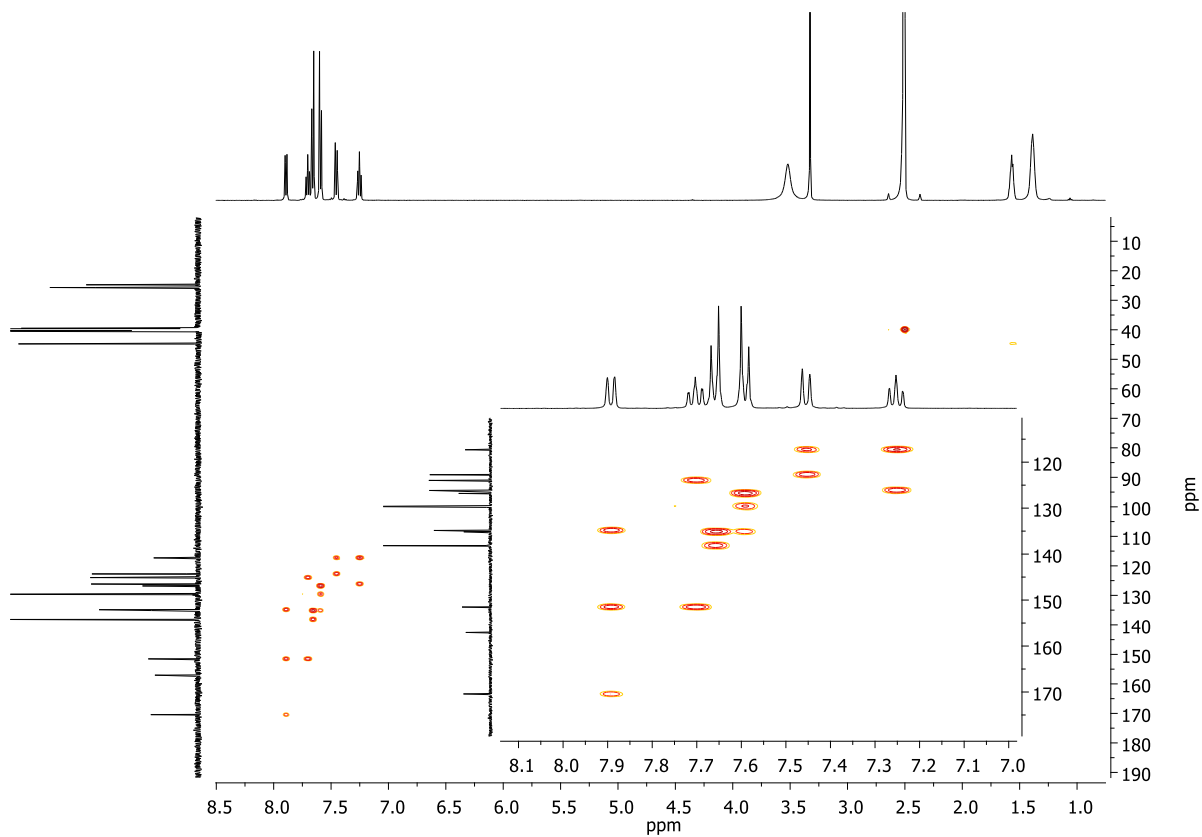

**COSY spectrum of compound 5a:**

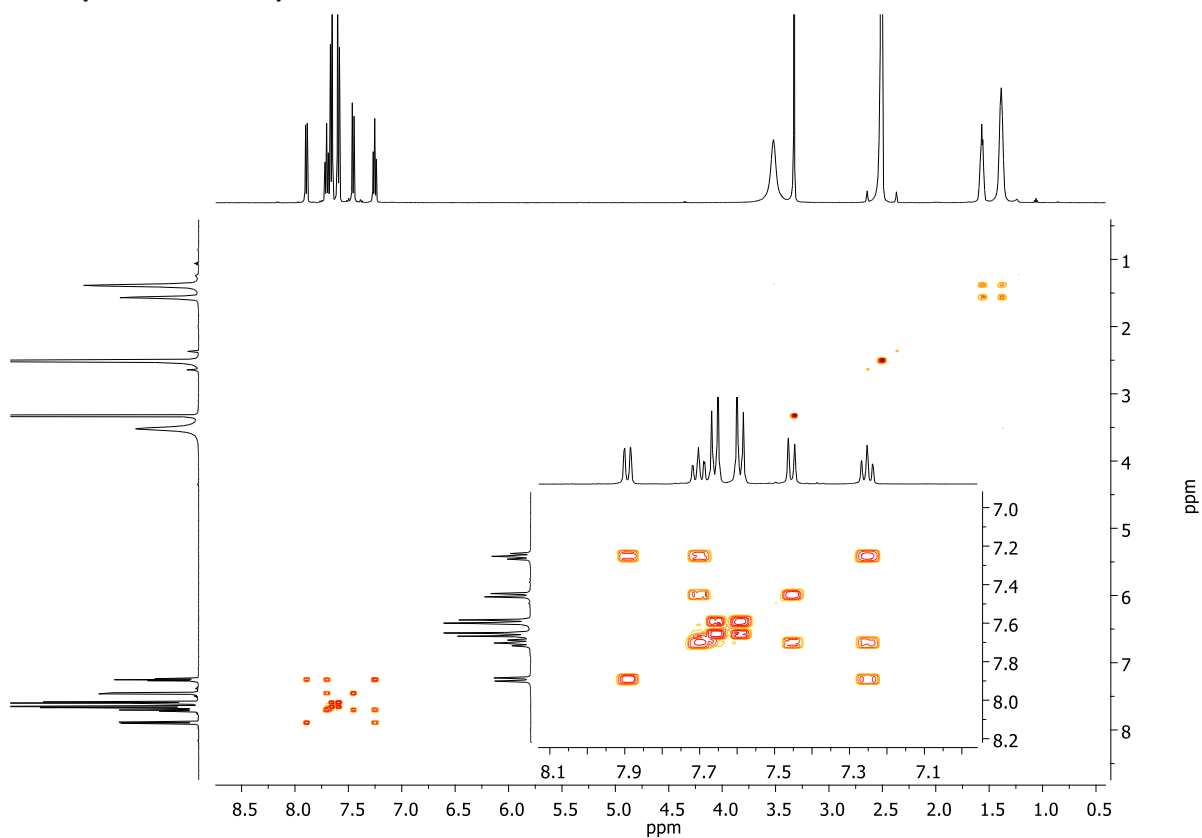

**4-[(4-Bromophenyl)thio]-2-(piperidin-1-yl)quinazoline (5b)**

**<sup>1</sup>H-NMR (500 MHz, CDCl<sub>3</sub>) spectrum of compound 5b:**

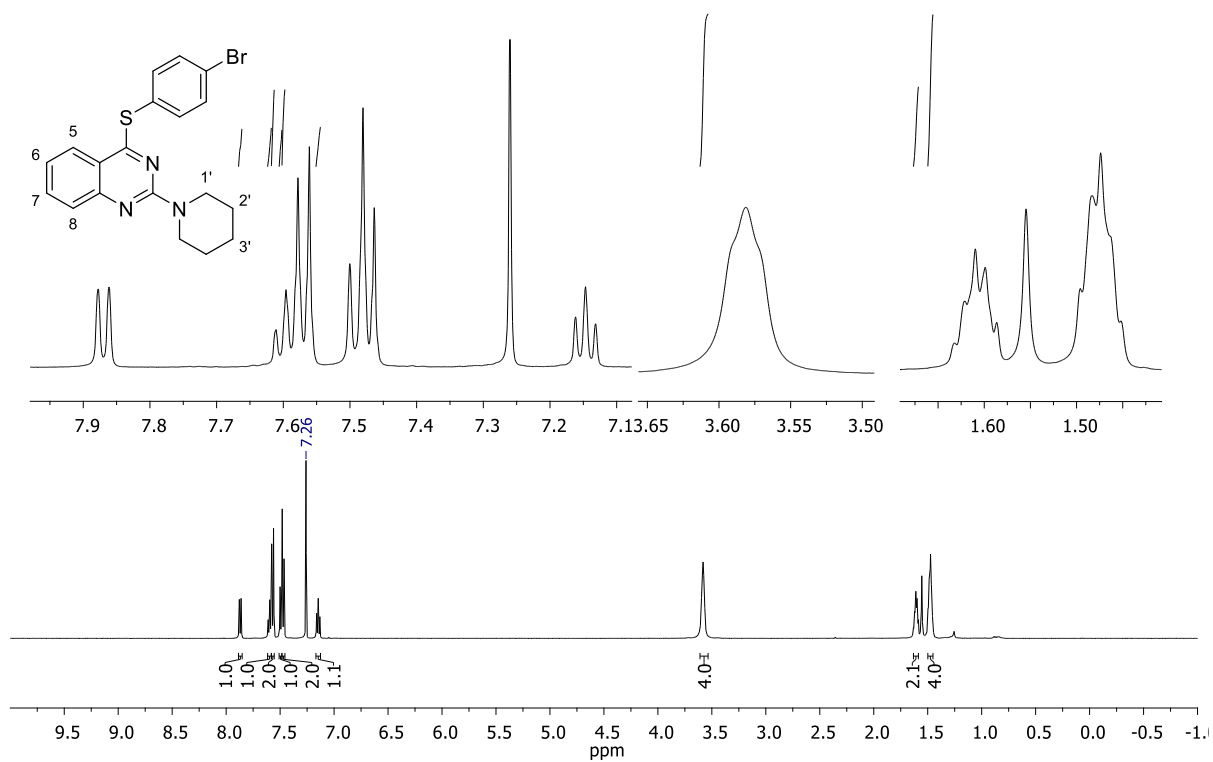

**$^{13}\text{C}$ -NMR (125.7 MHz,  $\text{CDCl}_3$ ) spectrum of compound 5b:**

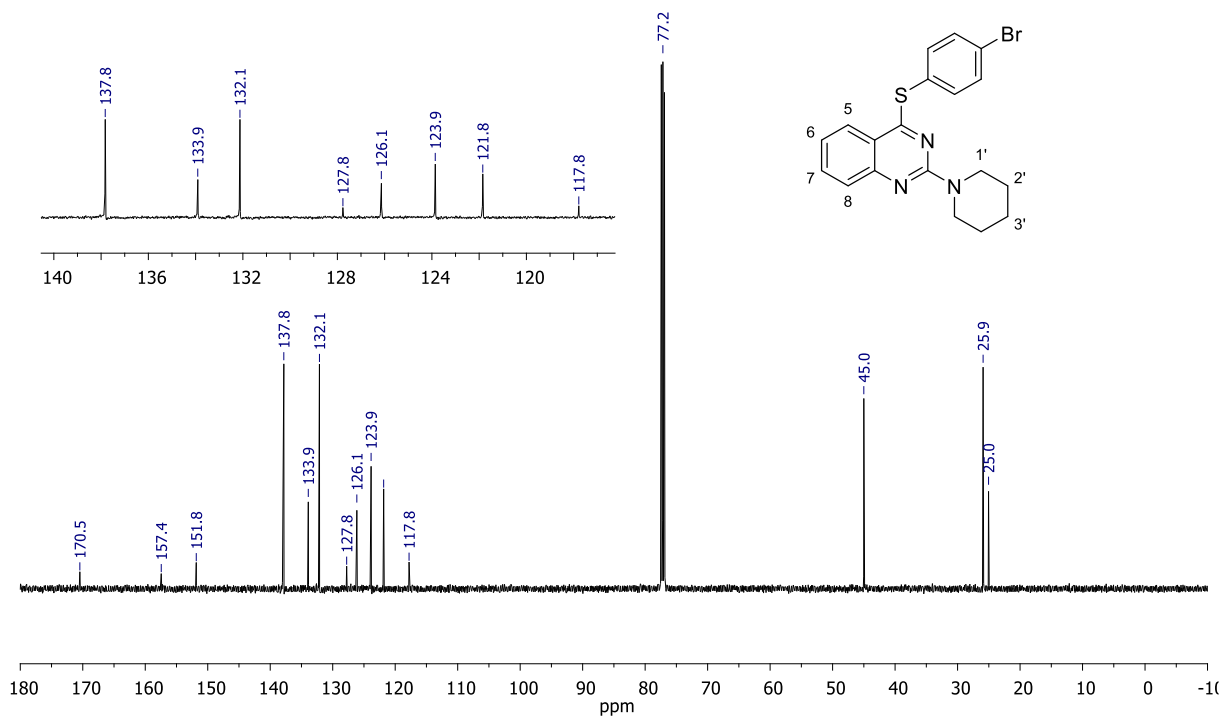

**HSQC spectrum of compound 5b:**

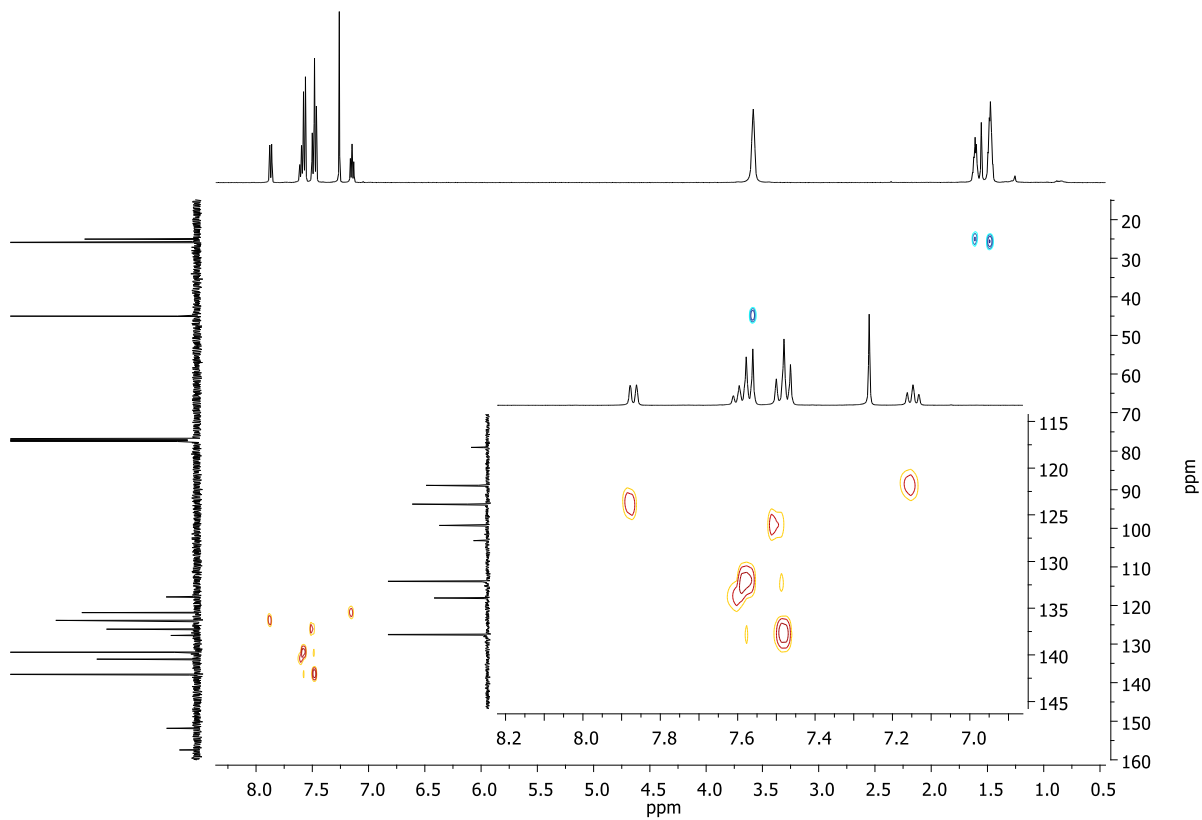

HMBC spectrum of compound 5b:

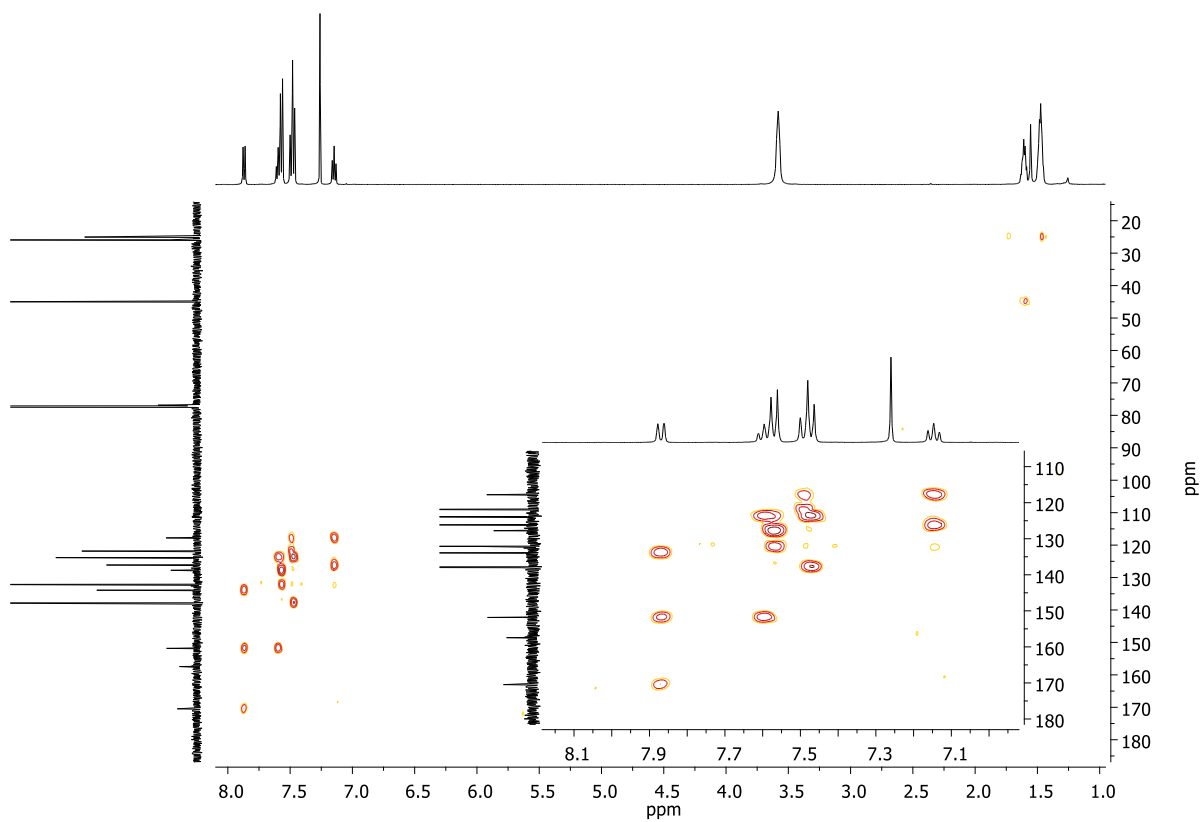

COSY spectrum of compound 5b:

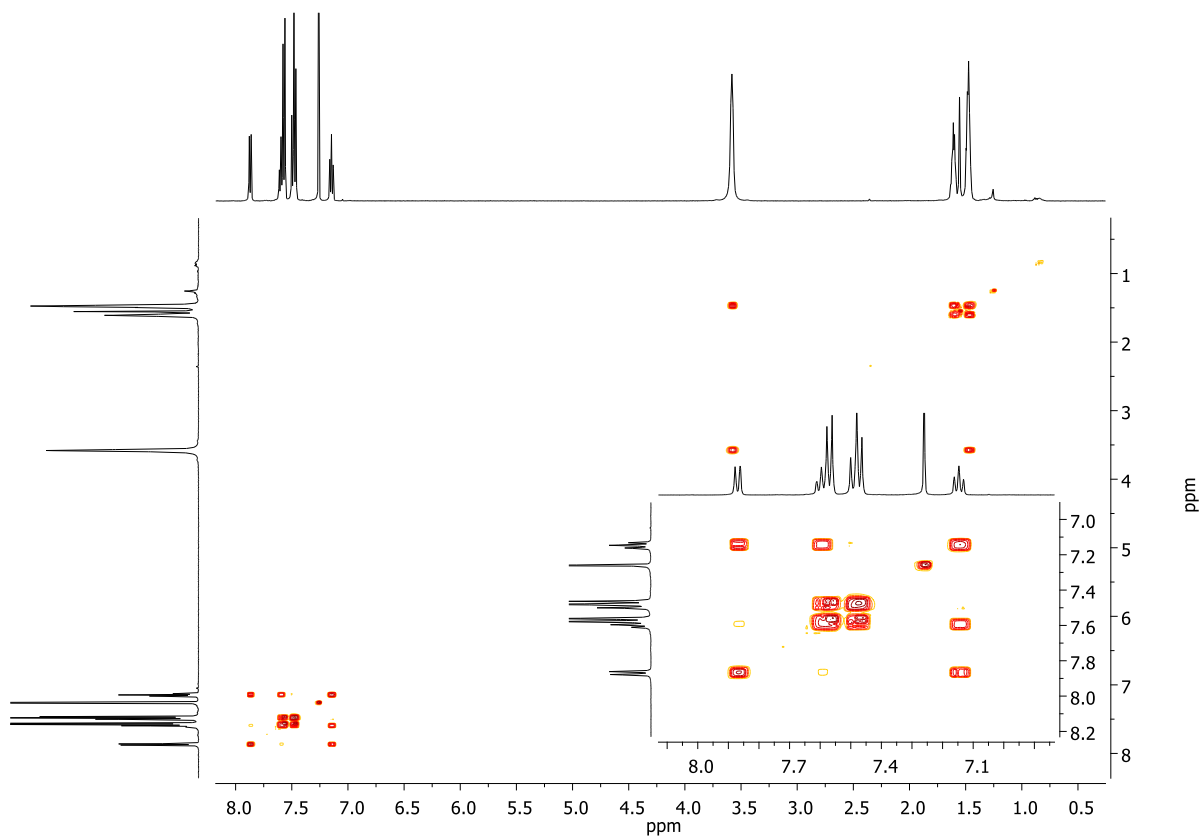

## 2,4-Bis-(arylthio)quinazolines

### 2,4-Bis-[(4-chlorophenyl)thio]quinazoline (12a)

$^1\text{H}$  NMR (500 MHz,  $\text{CDCl}_3$ ) spectrum of compound 12a:

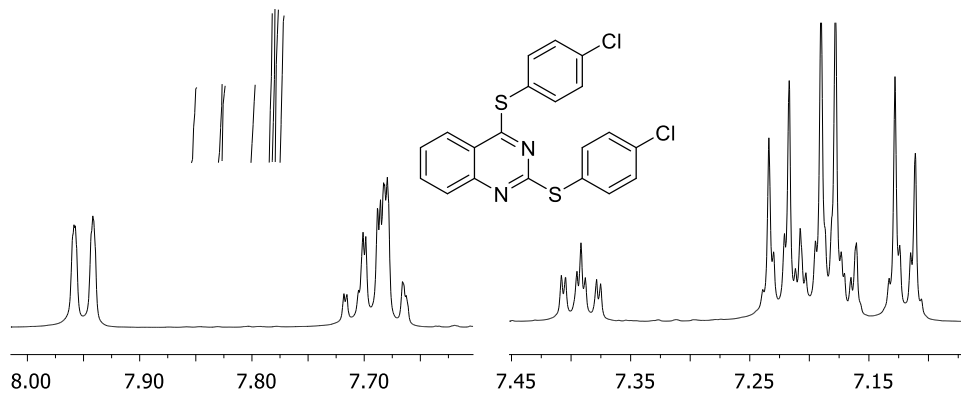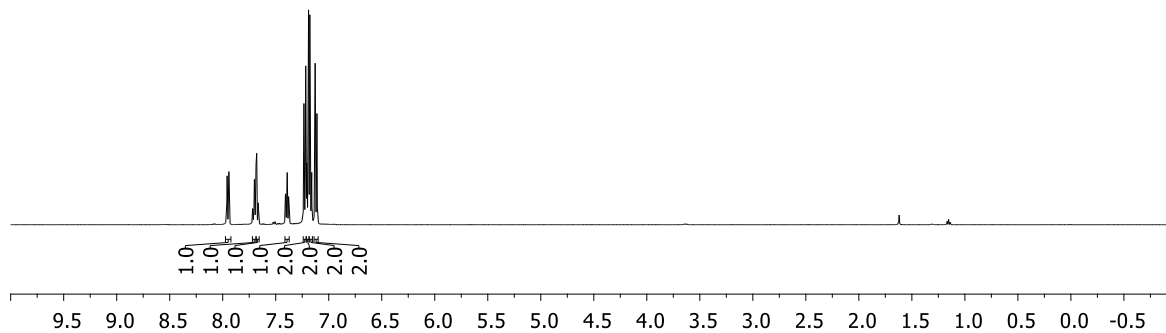

$^{13}\text{C}$ -NMR (125.7 MHz,  $\text{CDCl}_3$ ) spectrum of compound 12a:

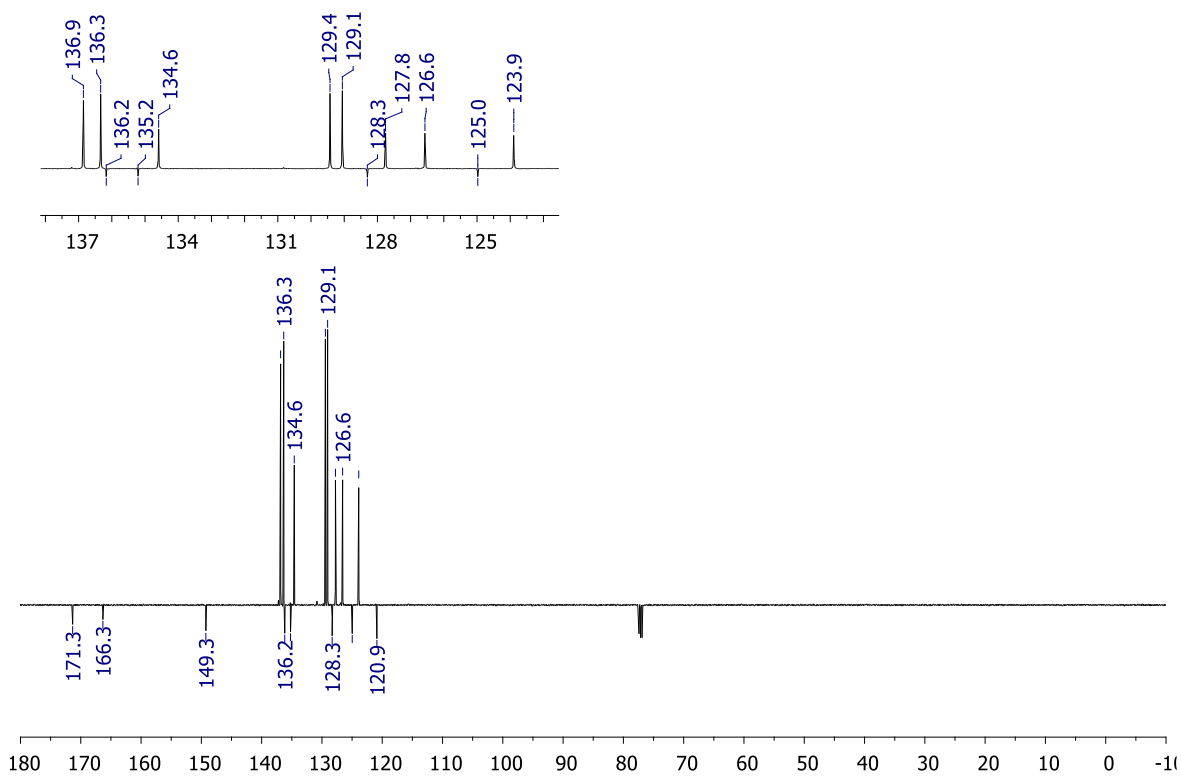



## 2,4-Bis-[(4-bromophenyl)thio]quinazoline (12b)

$^1\text{H}$  NMR (500 MHz,  $\text{CDCl}_3$ ) spectrum of compound 12b:

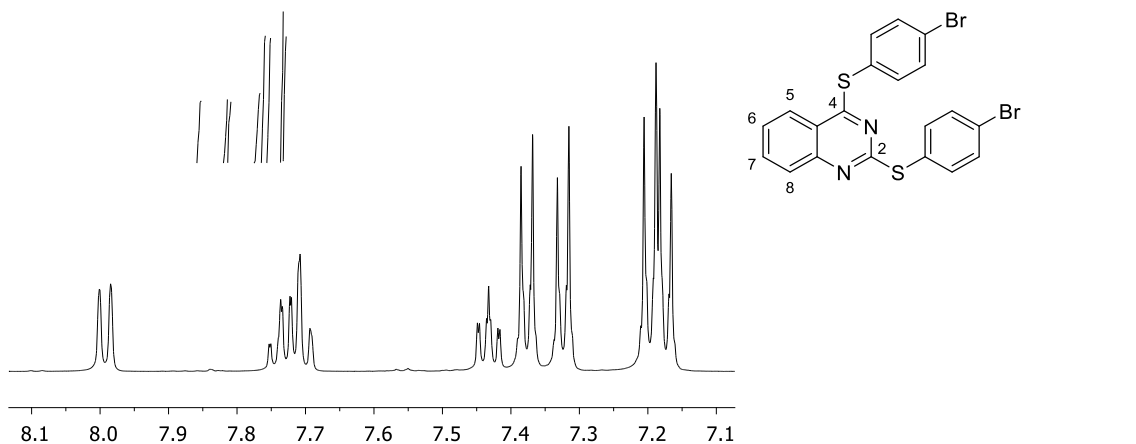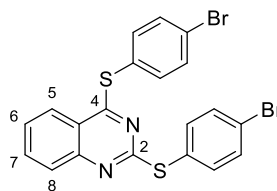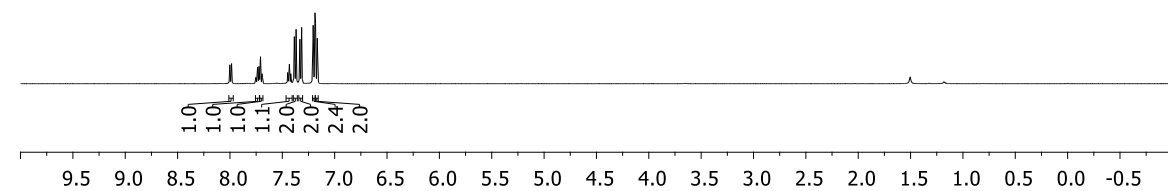

$^{13}\text{C}$ -NMR (125.7 MHz,  $\text{CDCl}_3$ ) spectrum of compound 12b:

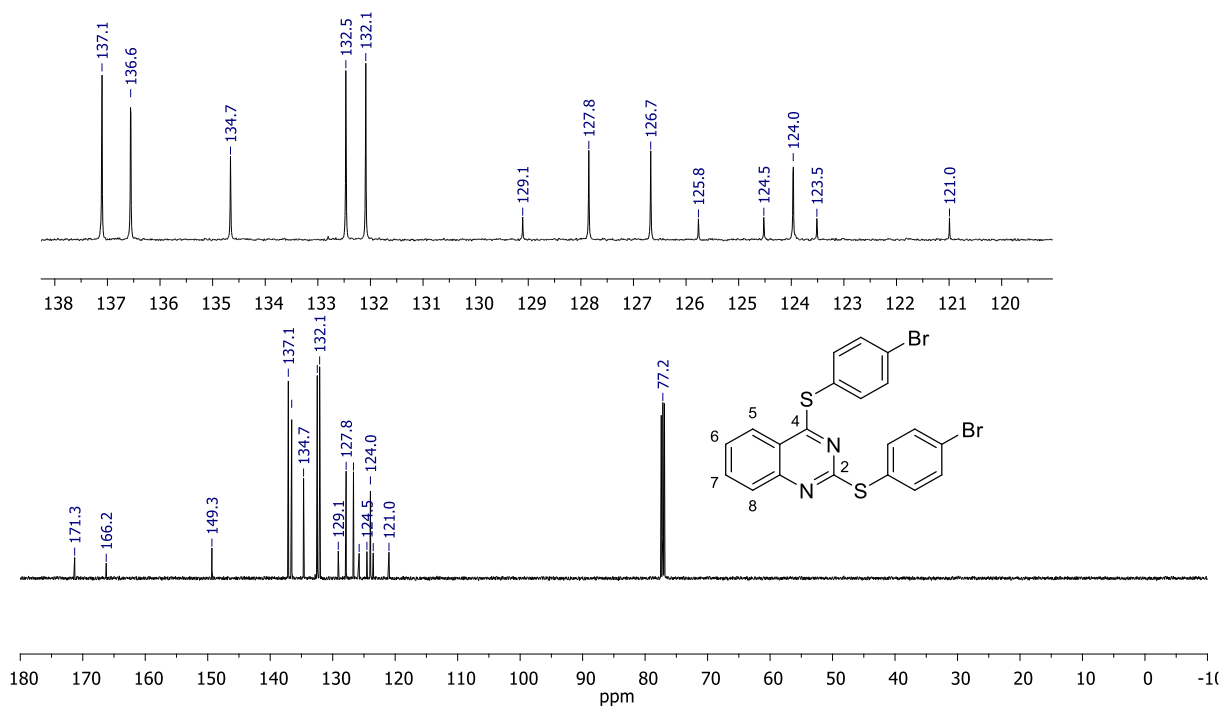

HSQC spectrum of compound 12b:

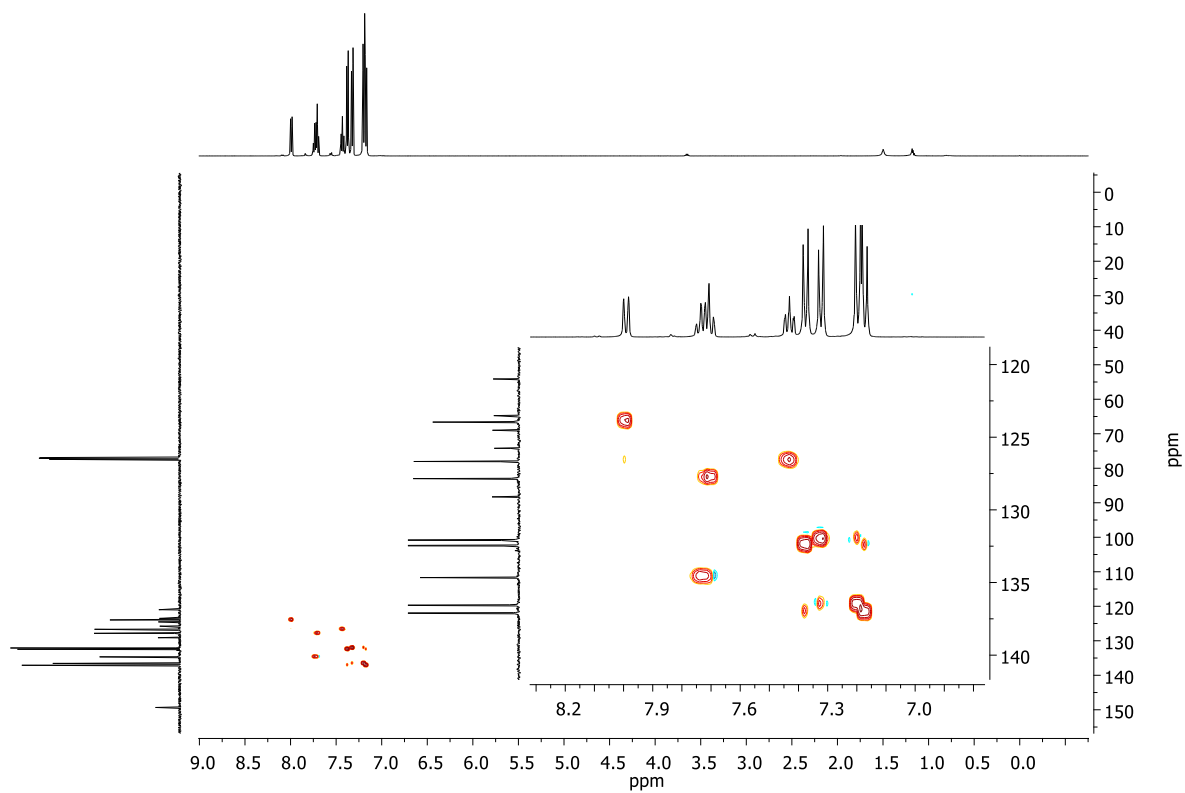

HMBC spectrum of compound 12b:

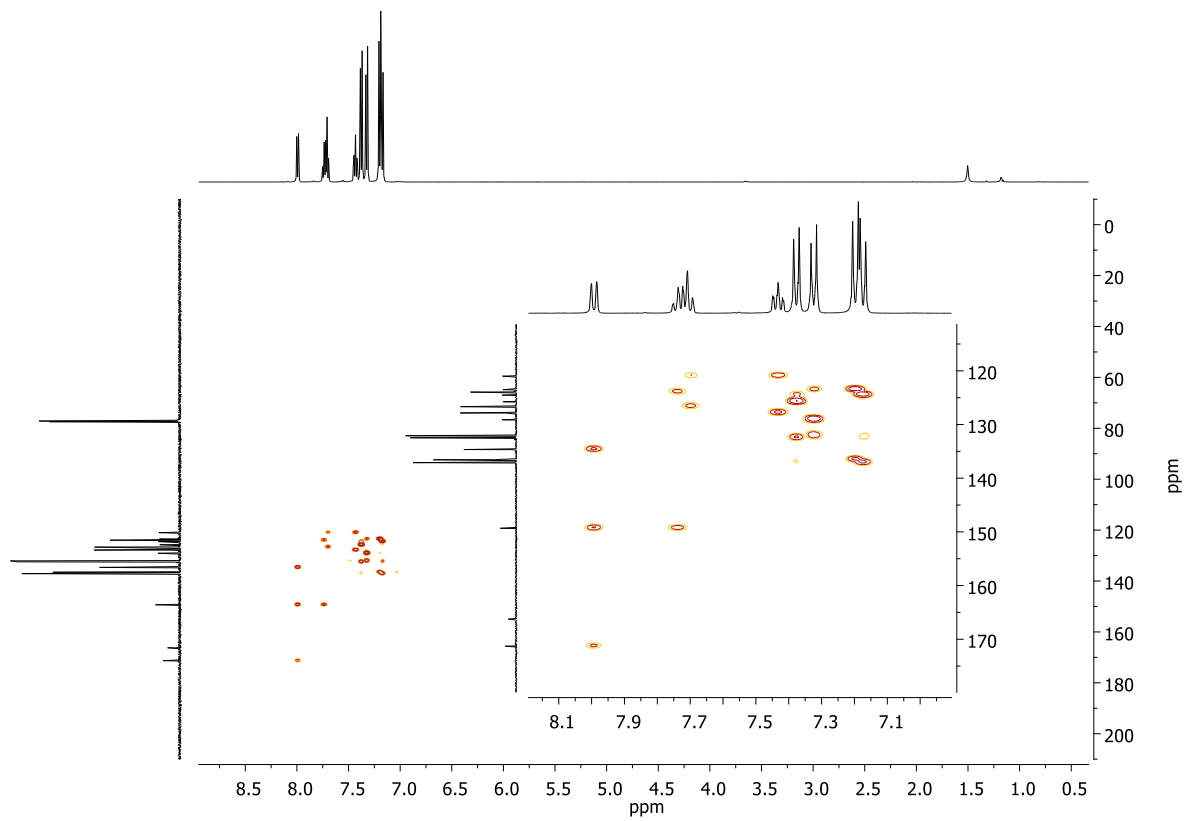

COSY spectrum of compound 12b:

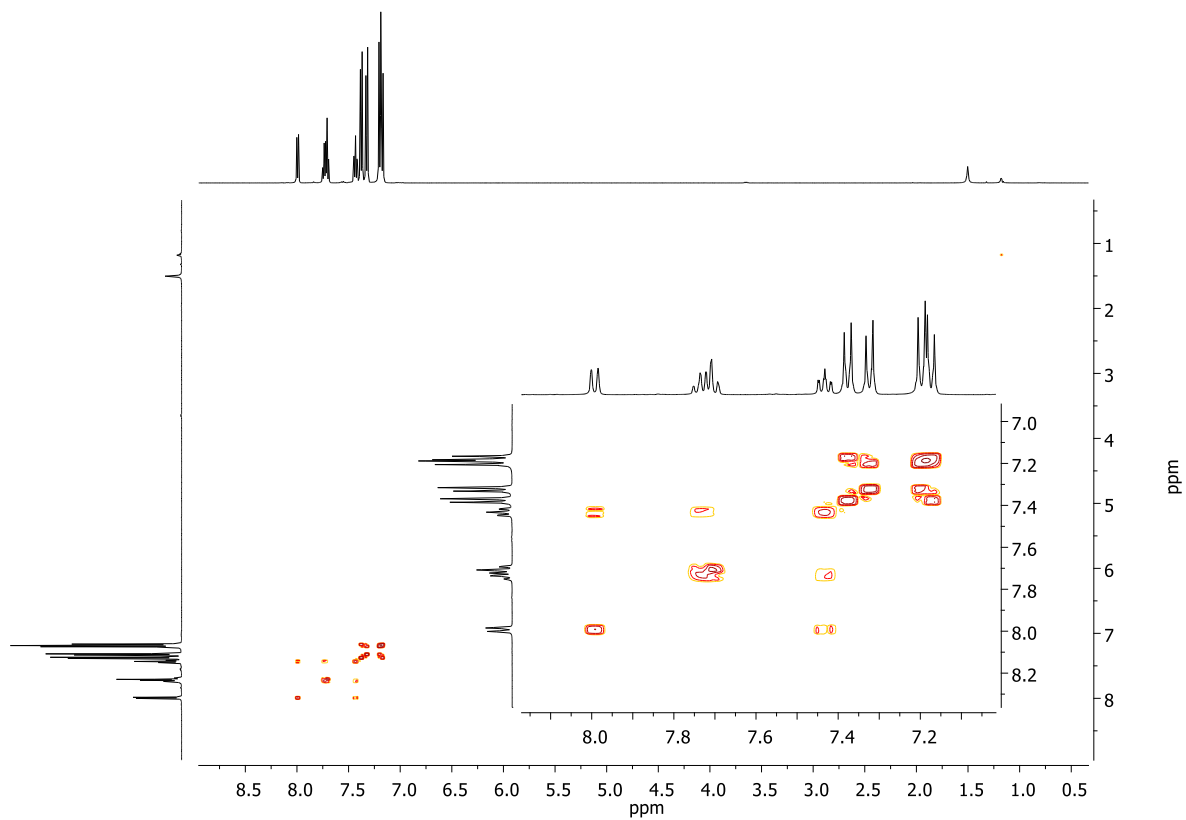

## 2-(Arylthio)-4-(piperidiny)quinazolines

### 2-[(4-Chlorophenyl)thio]-4-(piperidin-1-yl)quinazoline (13a)

<sup>1</sup>H-NMR (500 MHz, CDCl<sub>3</sub>) spectrum of compound 13a:

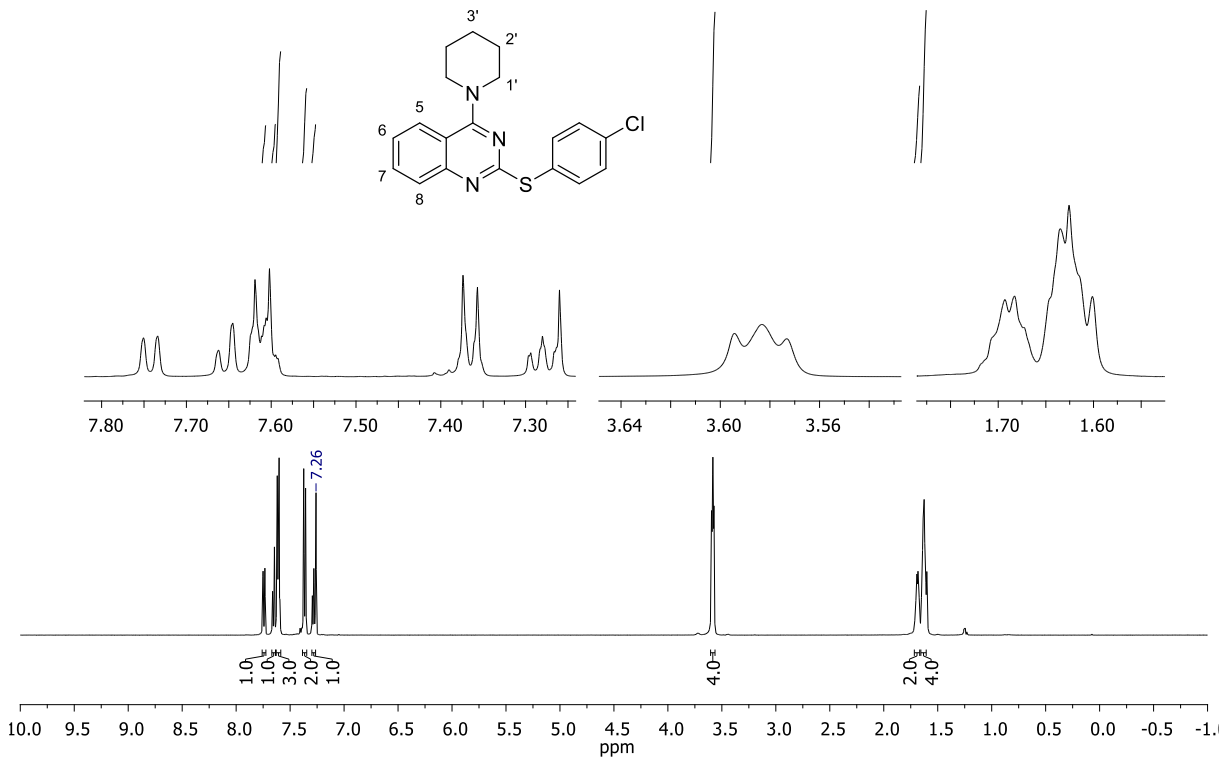

<sup>13</sup>C-NMR (125.7 MHz, CDCl<sub>3</sub>) spectrum of compound 13a:

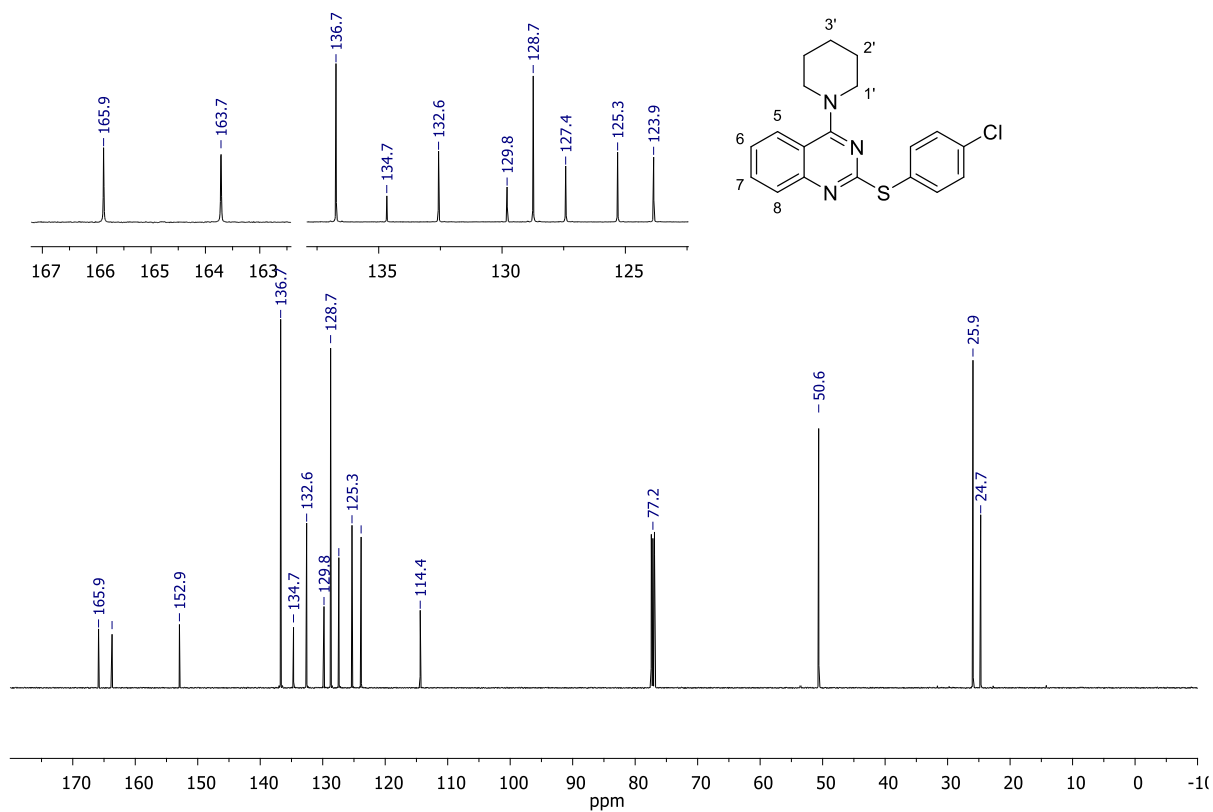

HSQC spectrum of compound 13a:

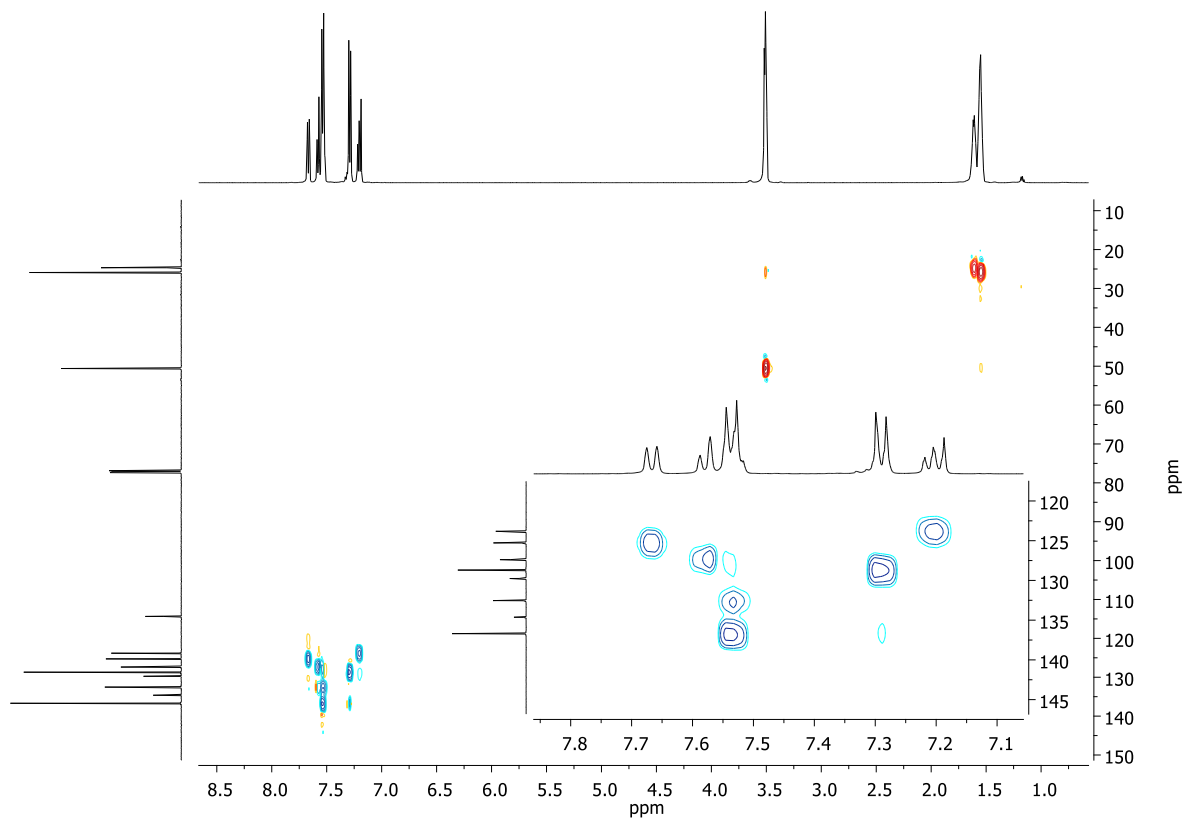

HMBC spectrum of compound 13a:

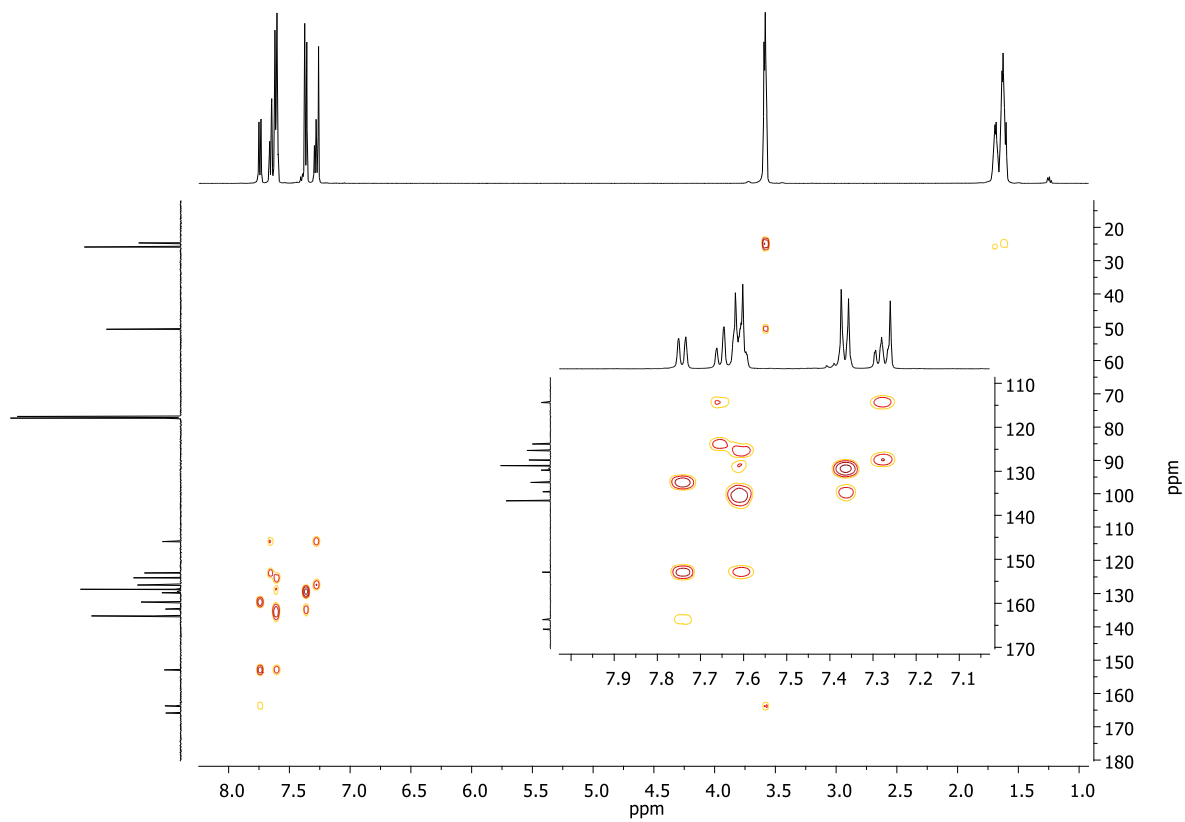

COSY spectrum of compound 13a:

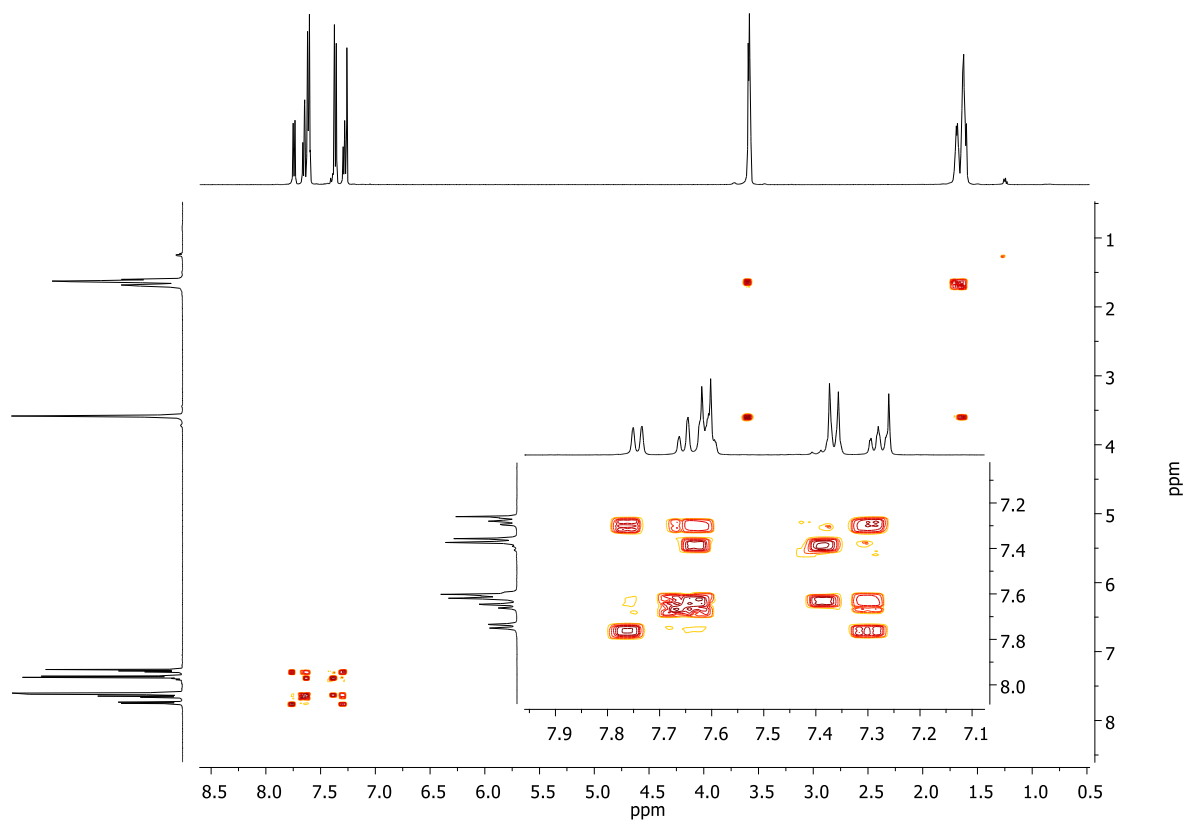

NOESY spectrum of compound 13a:

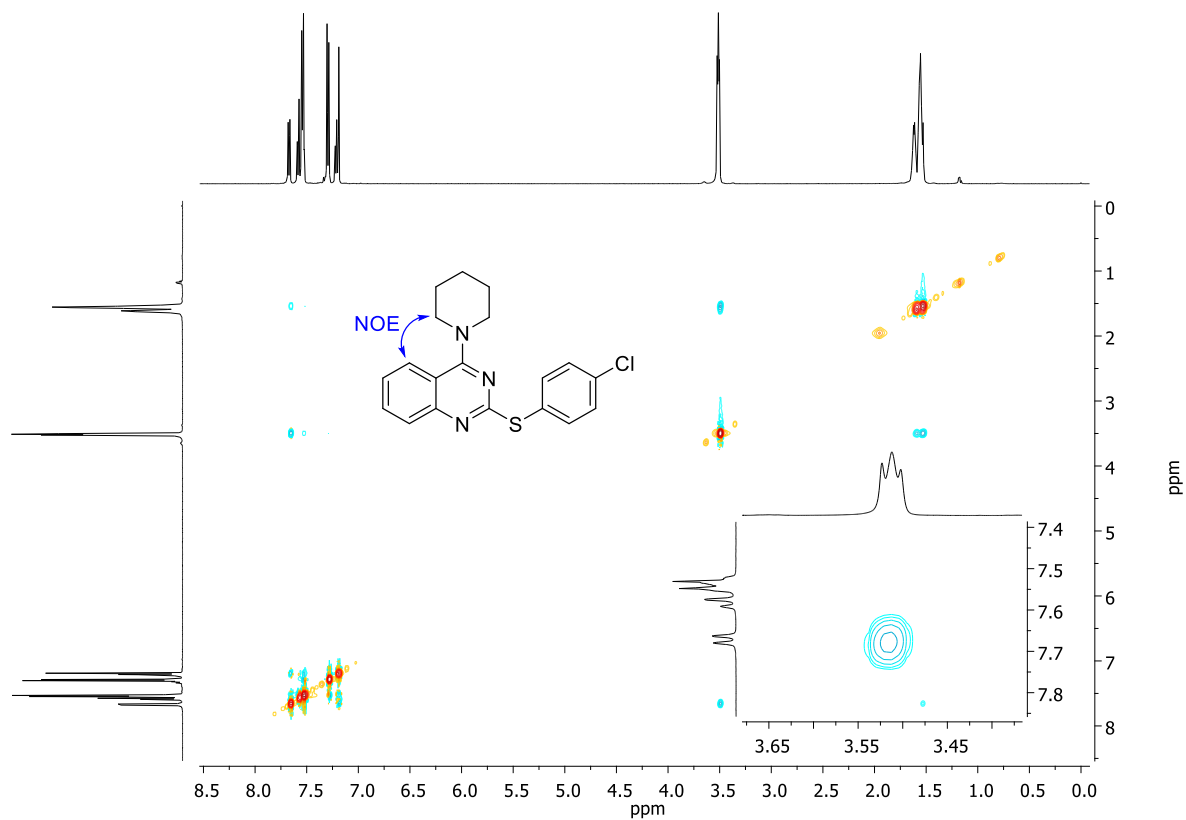

## 2-[(4-Bromophenyl)thio]-4-(piperidin-1-yl)quinazoline (13b)

<sup>1</sup>H-NMR (500 MHz, CDCl<sub>3</sub>) spectrum of compound 13b:

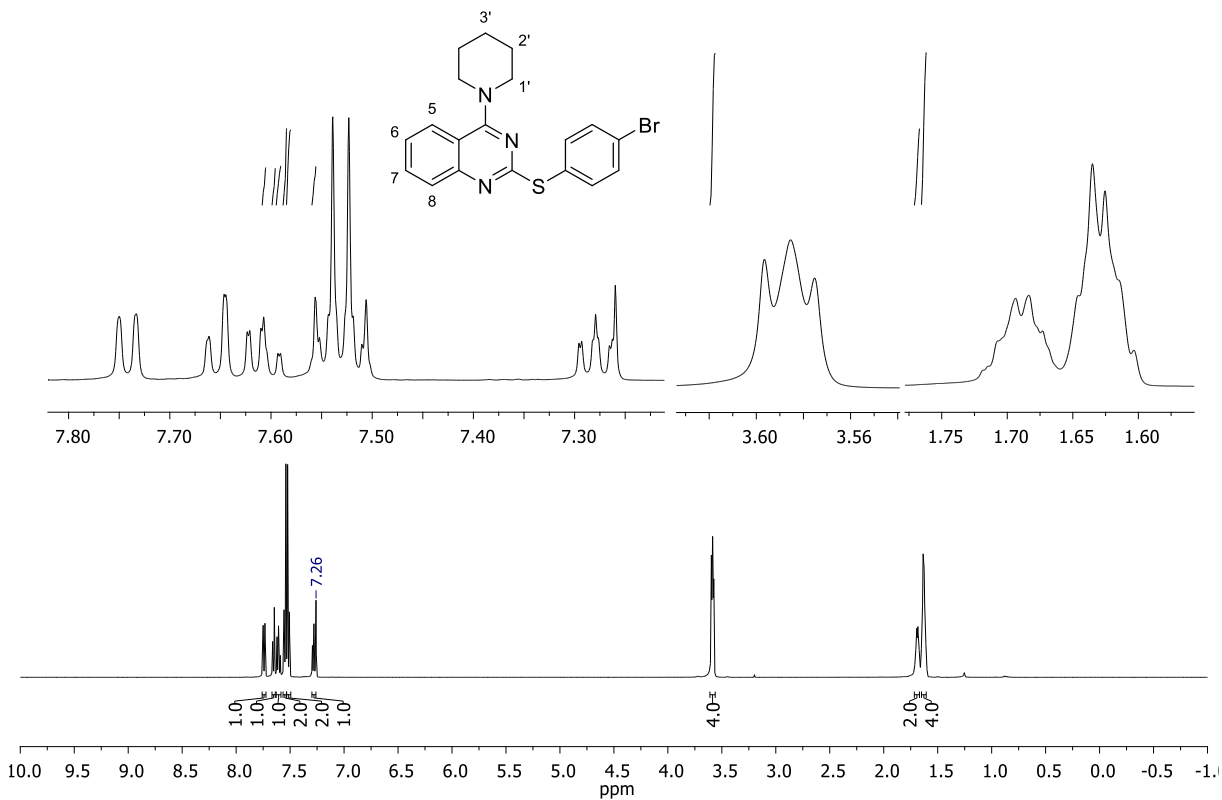

<sup>13</sup>C-NMR (125.7 MHz, CDCl<sub>3</sub>) spectrum of compound 13b:

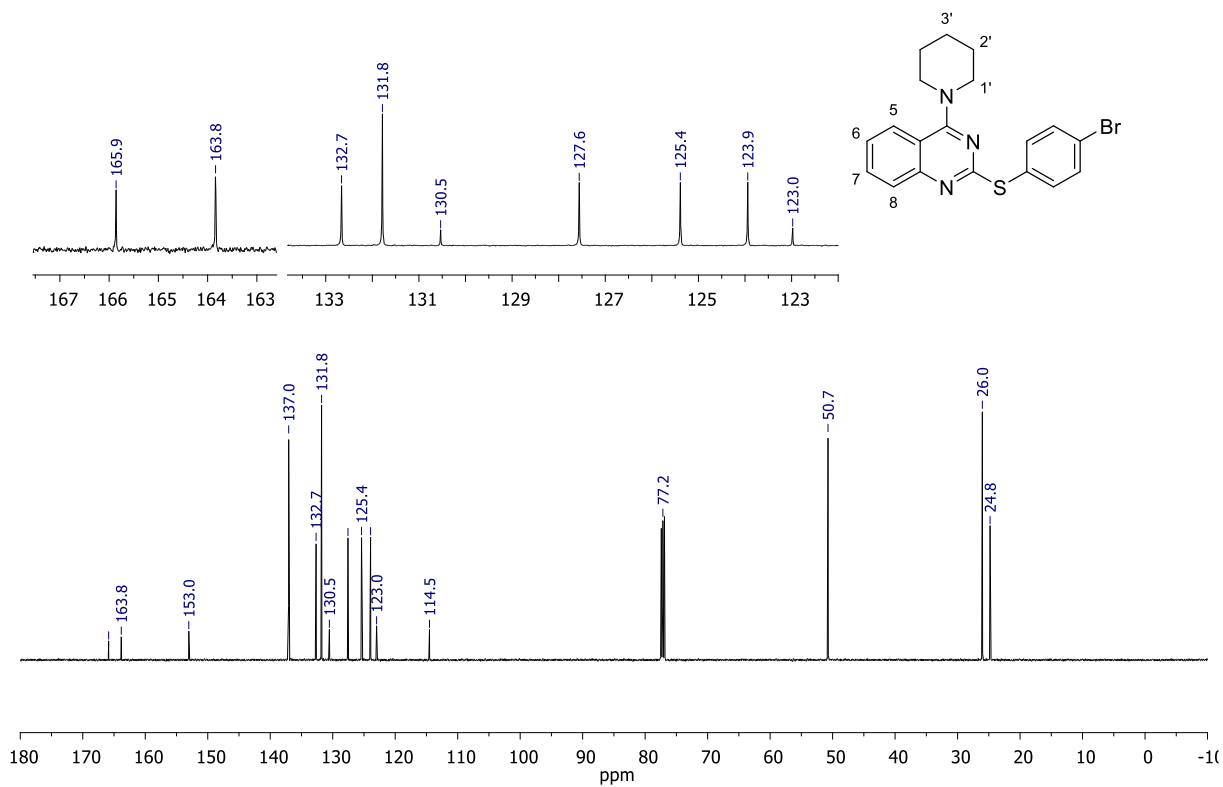

HSQC spectrum of compound 13b:

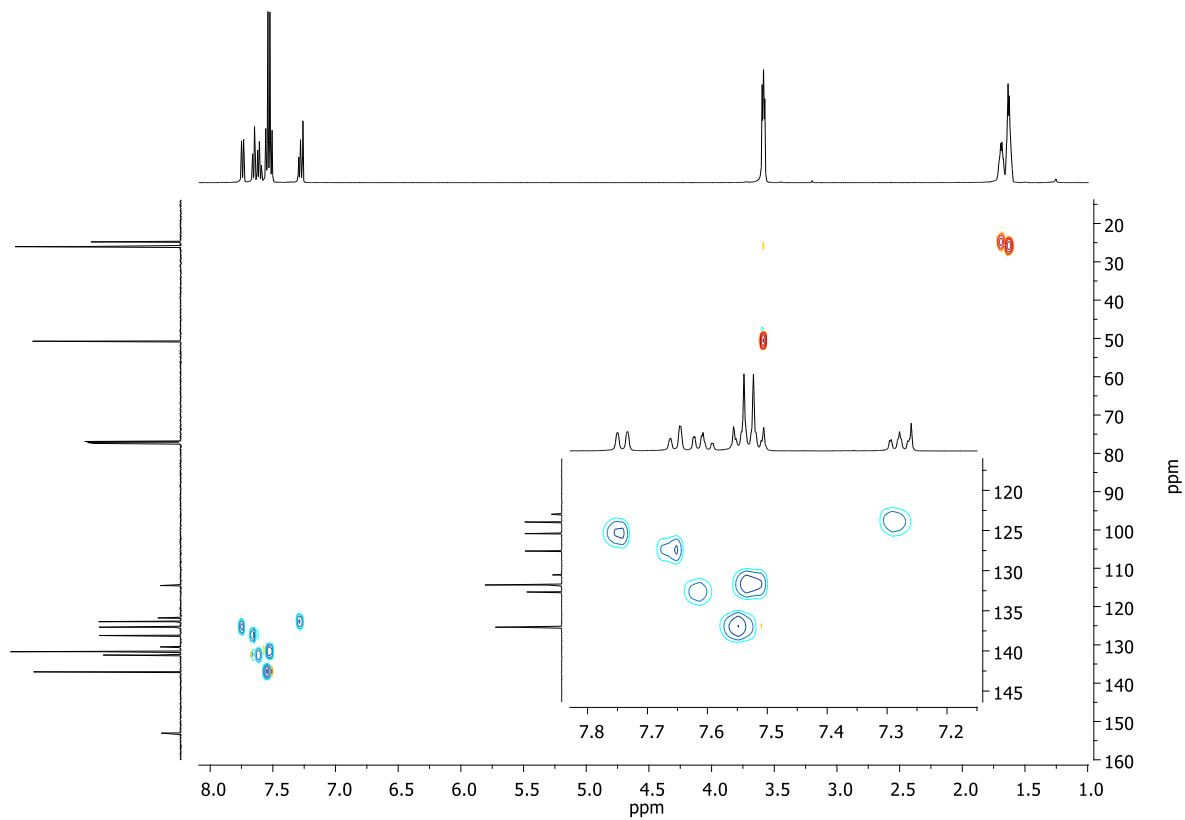

HMBC spectrum of compound 13b:

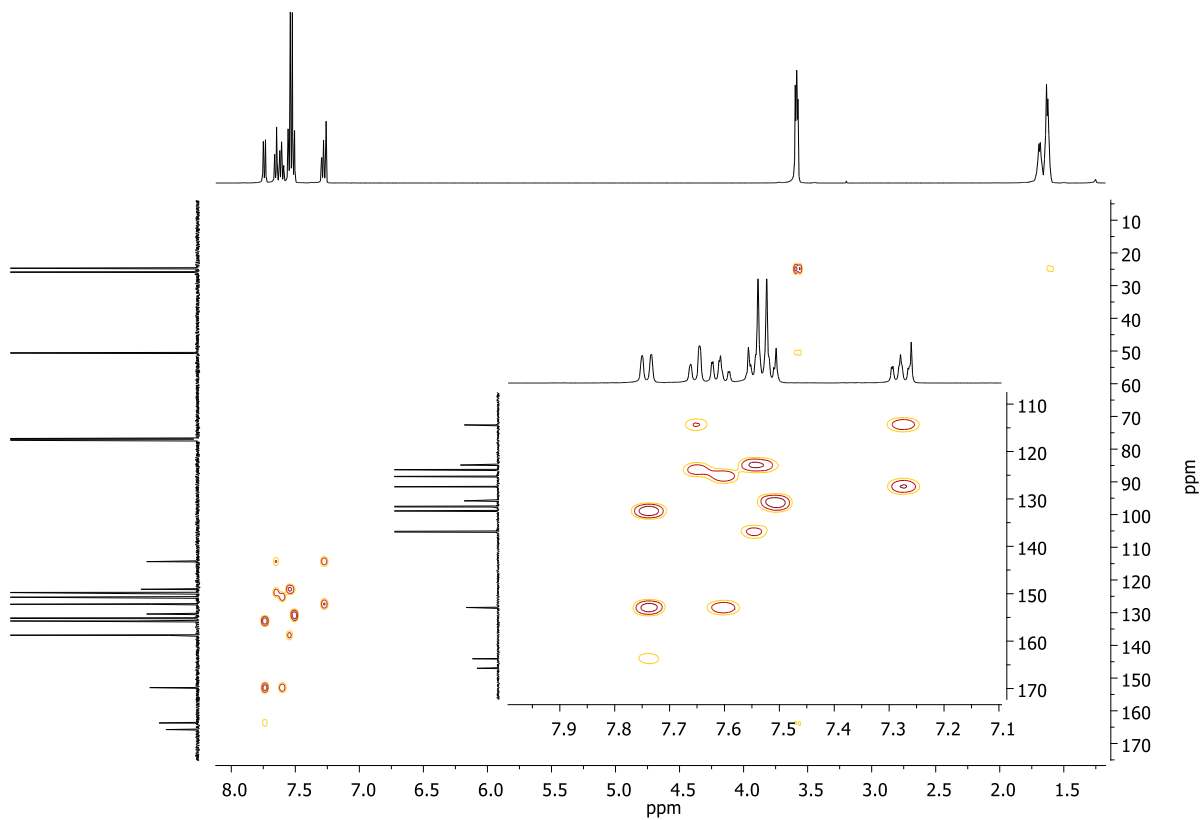



COSY spectrum of compound 13b:

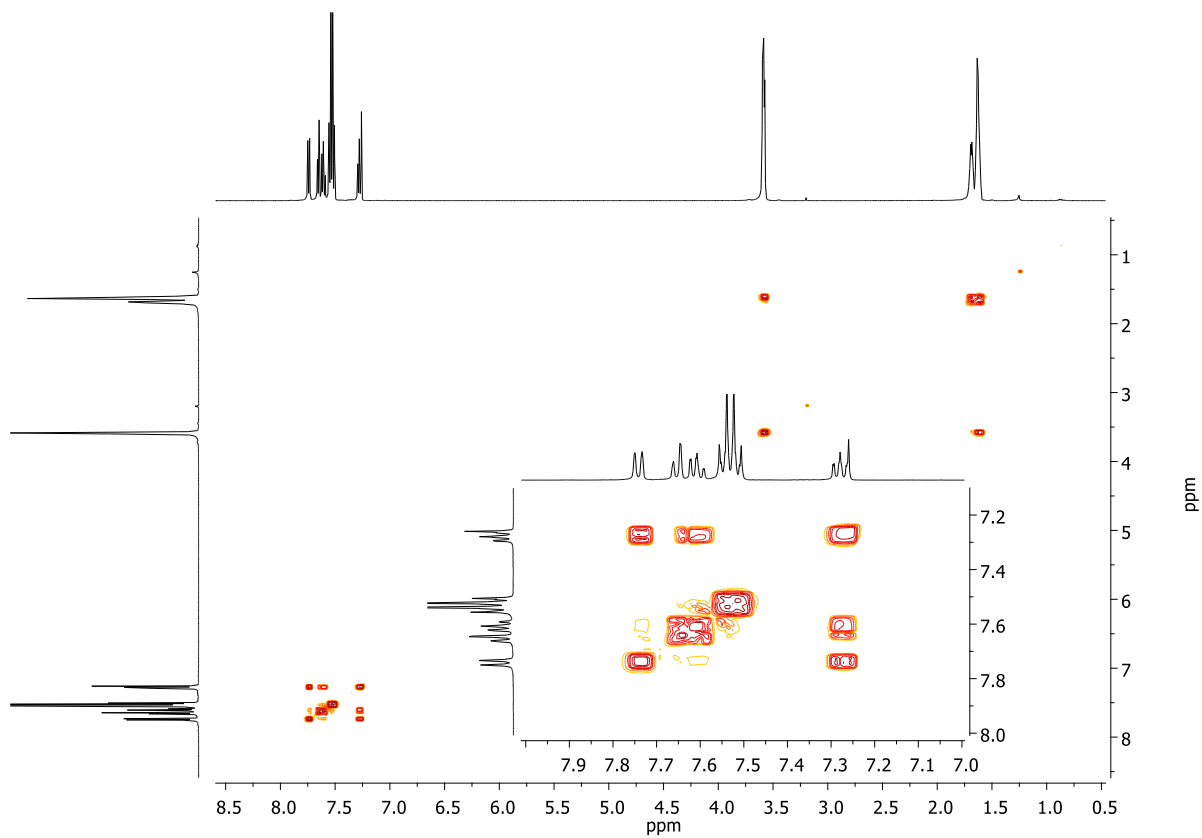

NOESY spectrum of compound 13b:

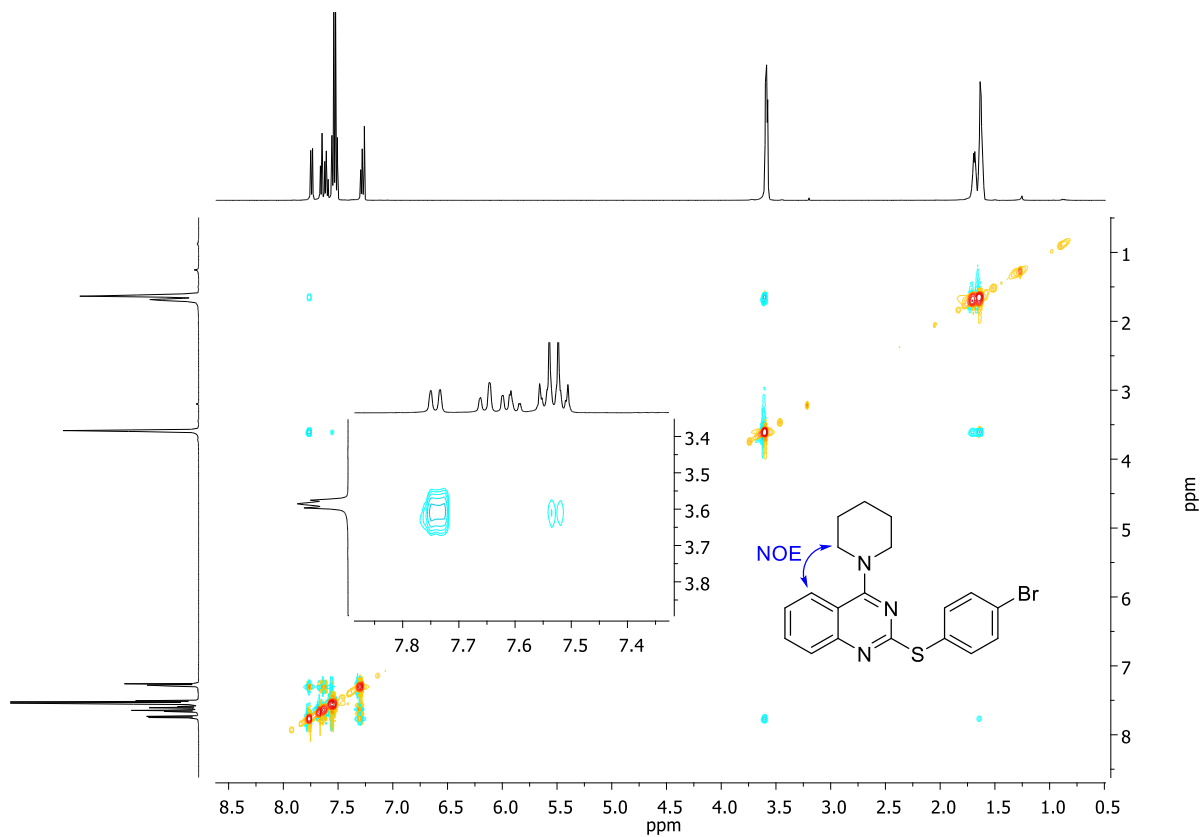

## 2-Amino-4-(1*H*-1,2,3-triazol-1-yl)quinazolines

### 4-(4-Phenyl-1*H*-1,2,3-triazol-1-yl)-2-(piperidin-1-yl)quinazoline (14a)

<sup>1</sup>H-NMR (500 MHz, CDCl<sub>3</sub>) spectrum of compound 14a:

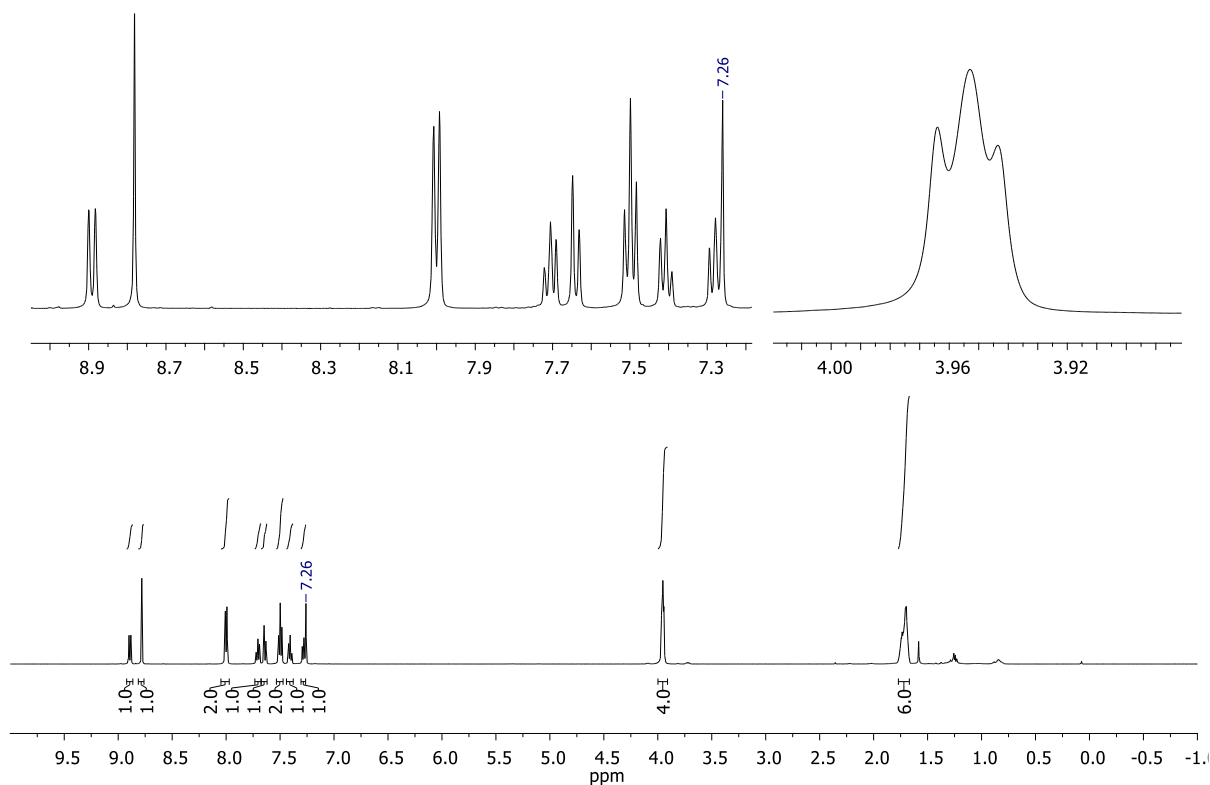

<sup>13</sup>C-NMR (125.7 MHz, CDCl<sub>3</sub>) spectrum of compound 14a:

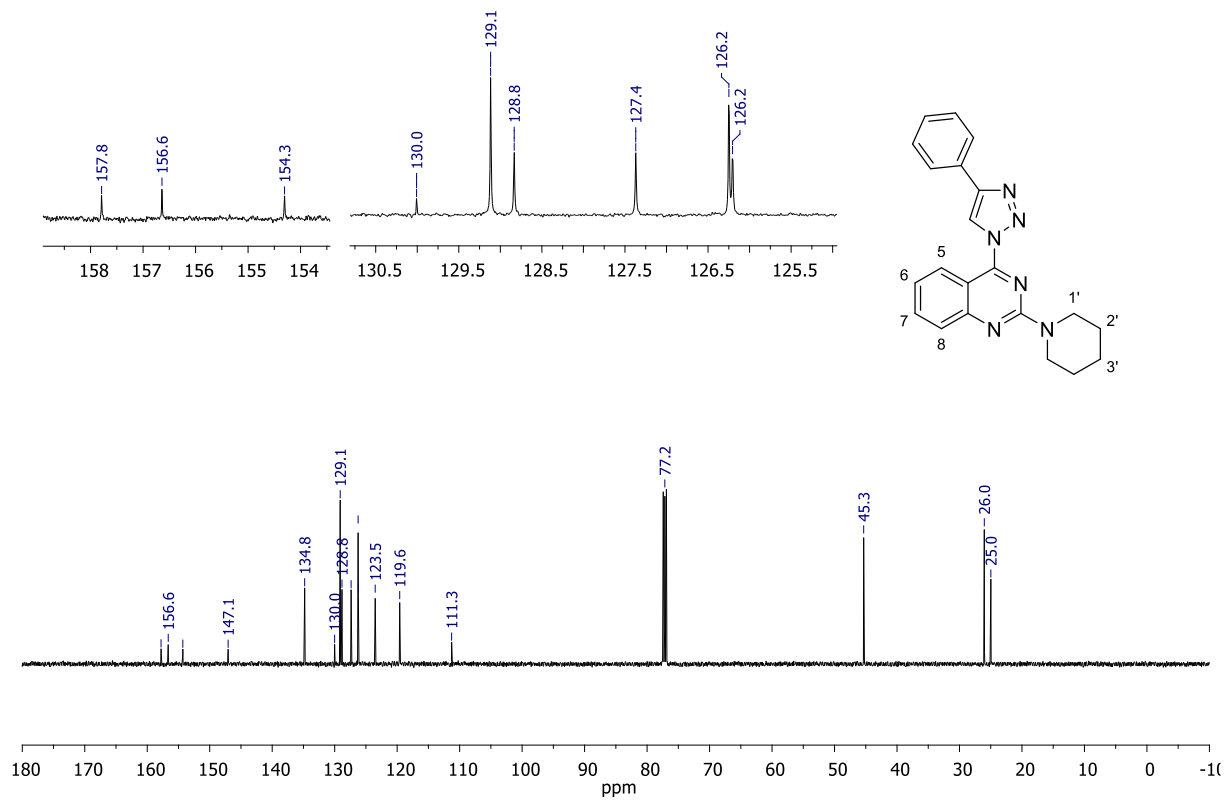

HSQC spectrum of compound 14a:

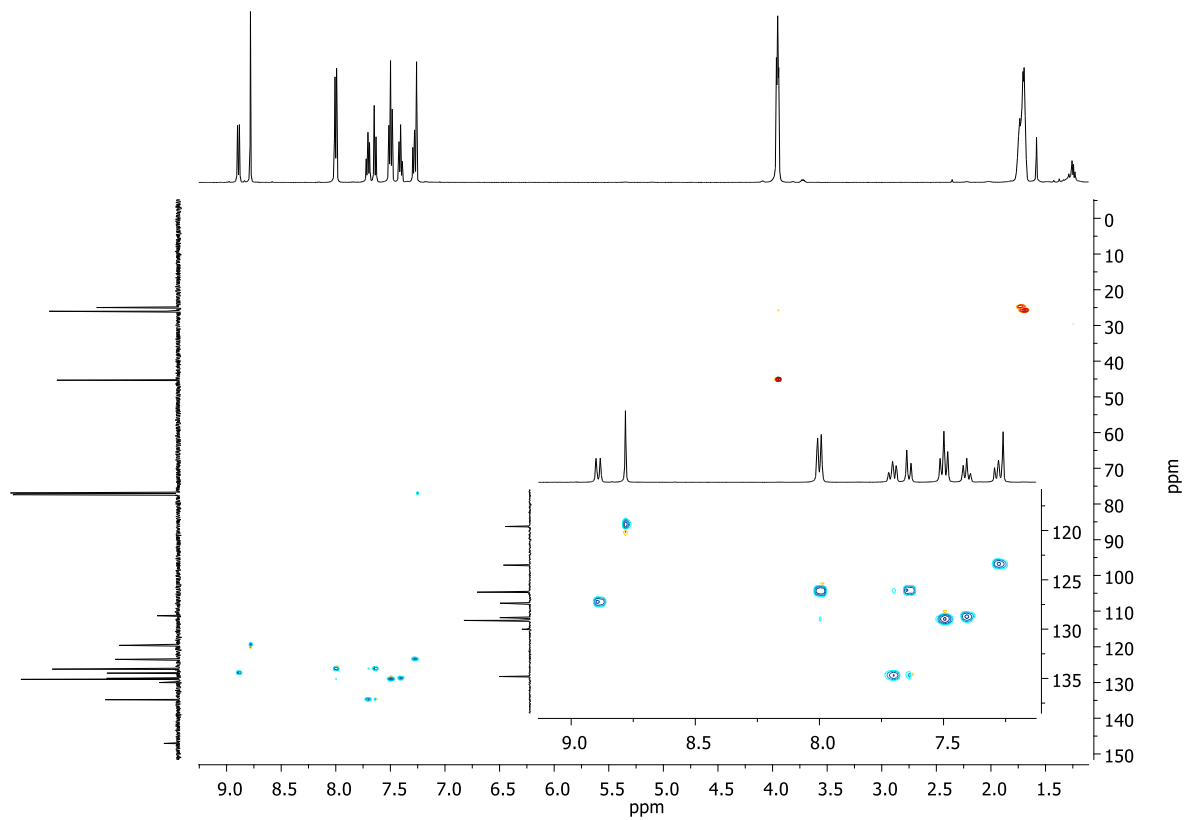

HMBC spectrum of compound 14a:

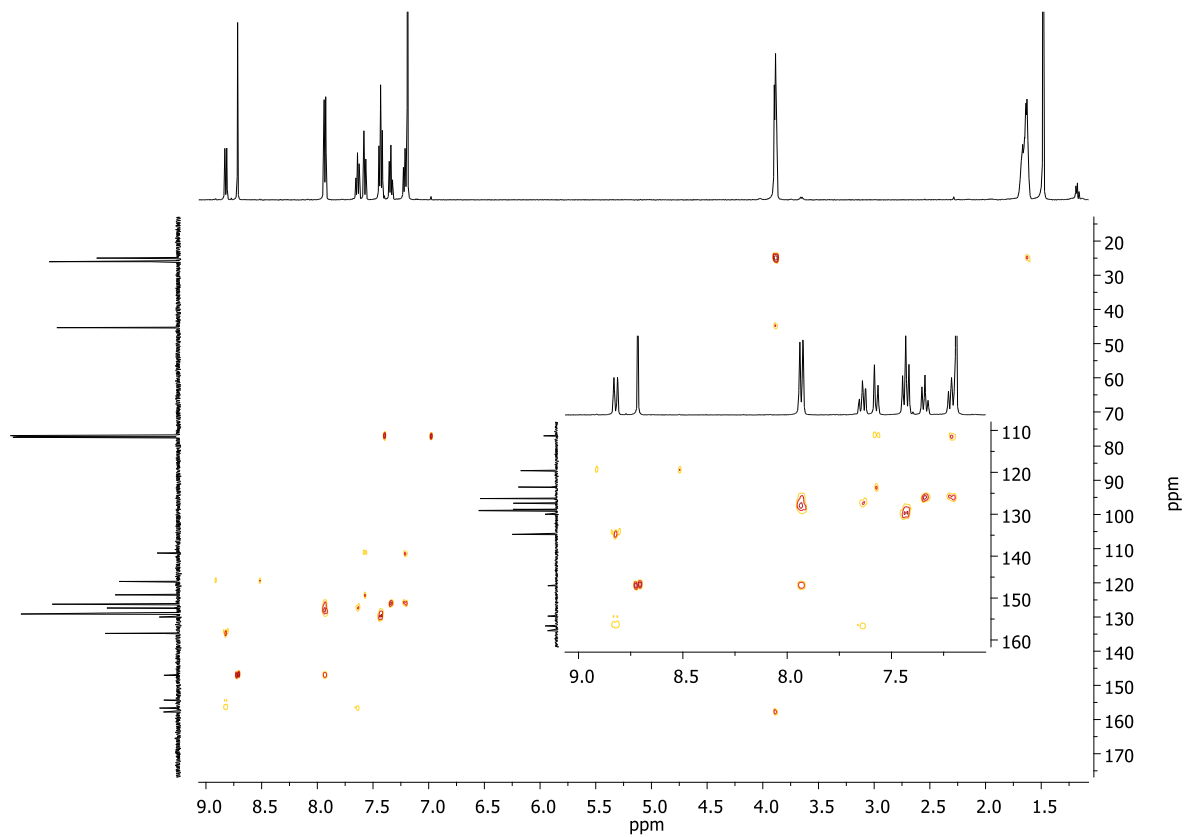

**COSY spectrum of compound 14a:**

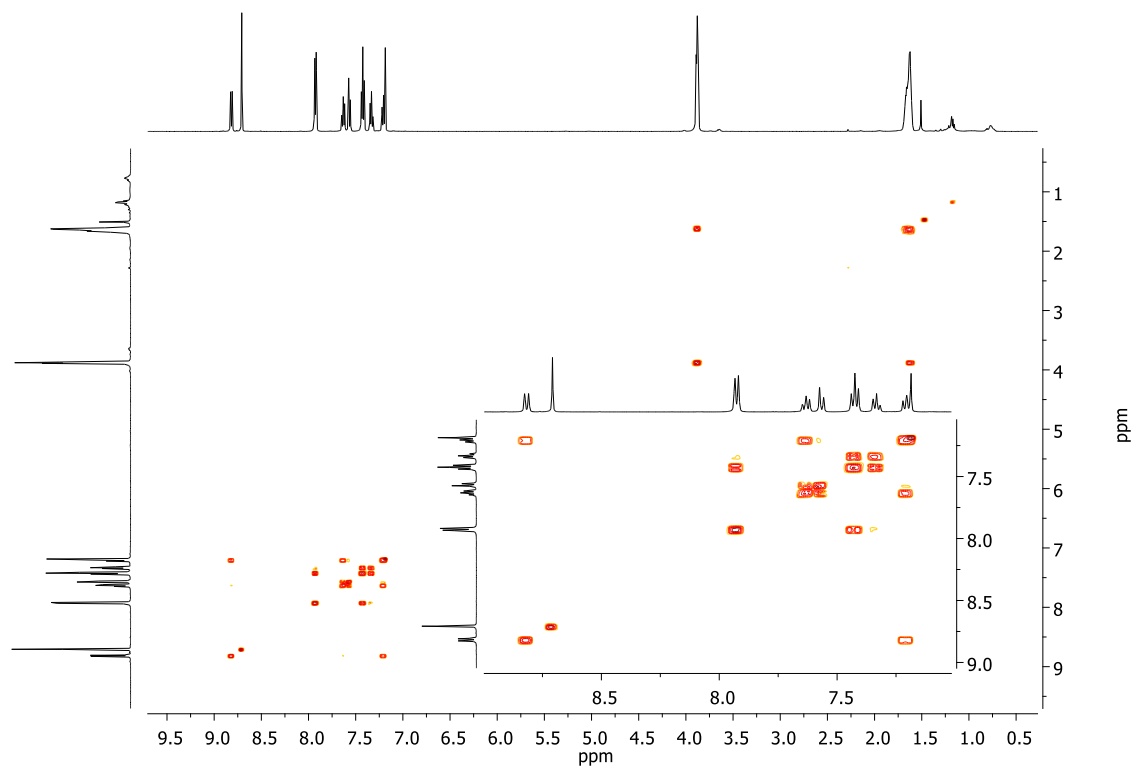

**4-(4-Phenyl-1H-1,2,3-triazol-1-yl)-2-(4-methylpiperazin-1-yl)quinazoline (14b)**

**<sup>1</sup>H-NMR (500 MHz, CDCl<sub>3</sub>) spectrum of compound 14b:**

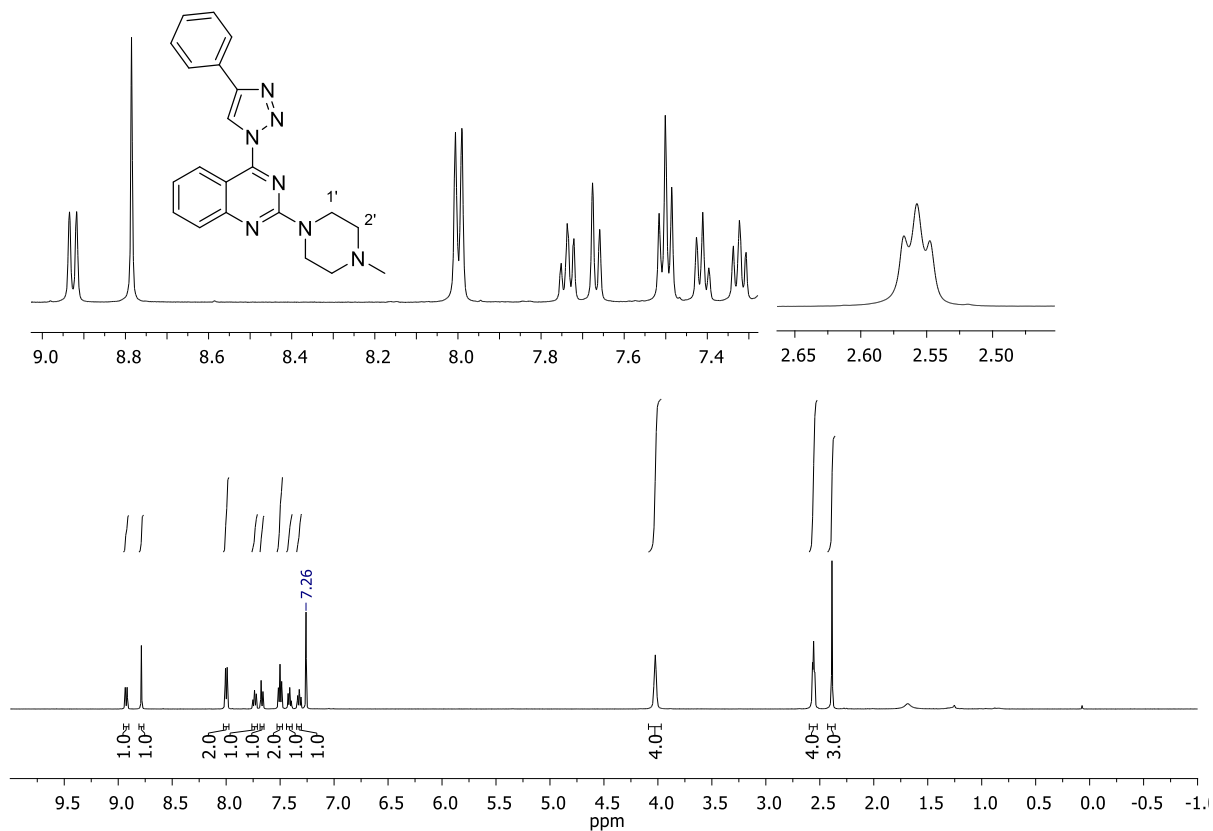

**<sup>13</sup>C-NMR (125.7 MHz, CDCl<sub>3</sub>) spectrum of compound 14b:**

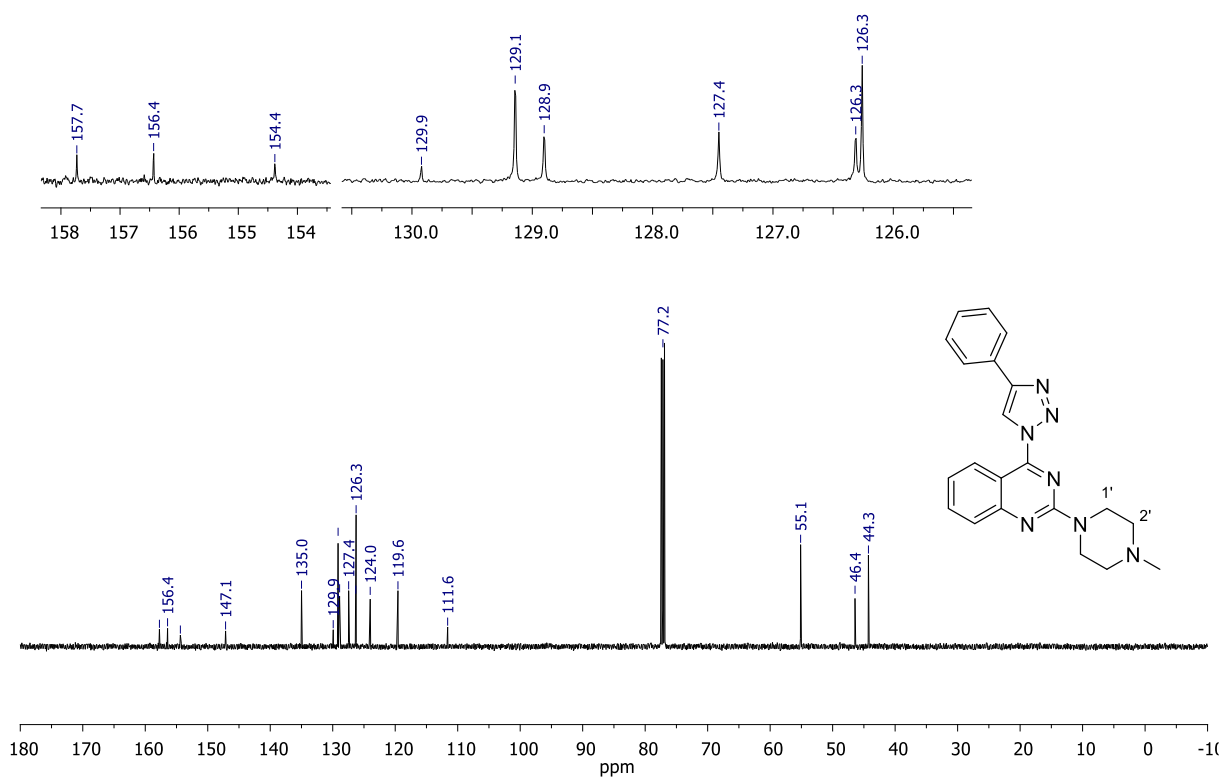

**HSQC spectrum of compound 14b:**

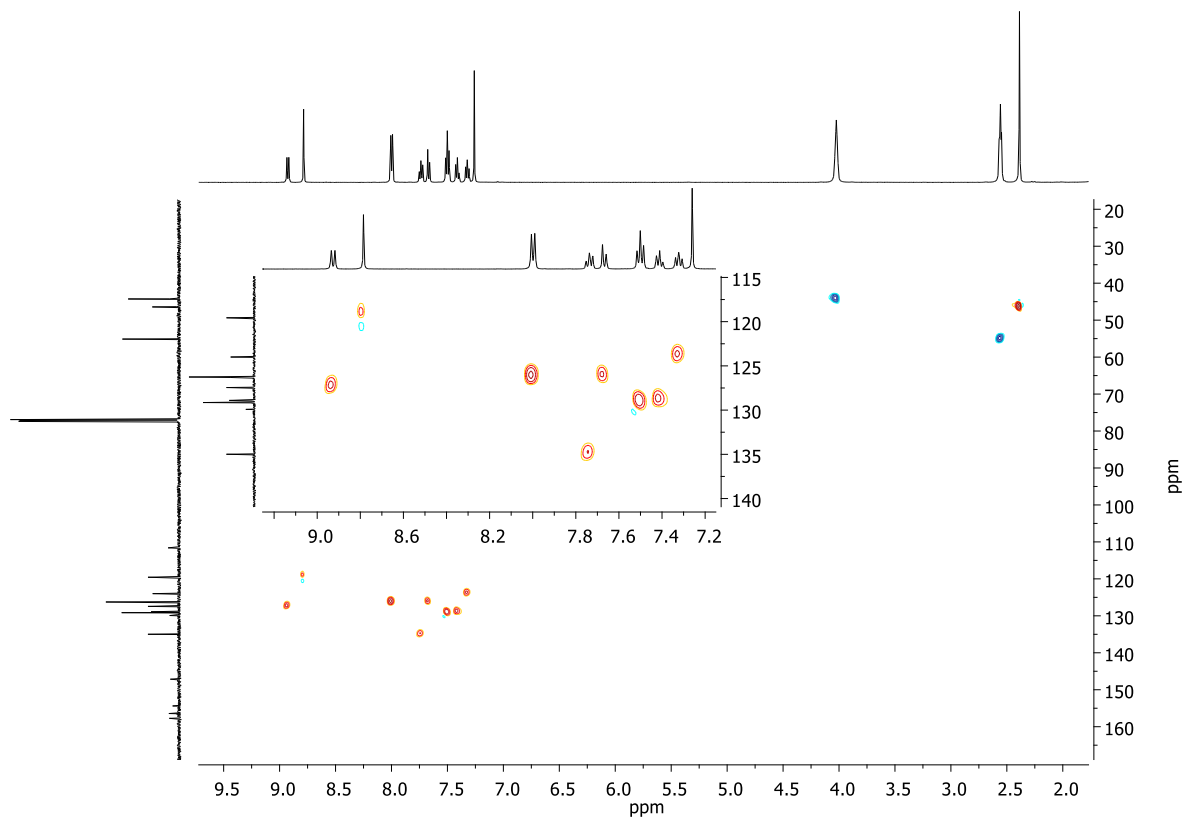

**COSY spectrum of compound 14b:**

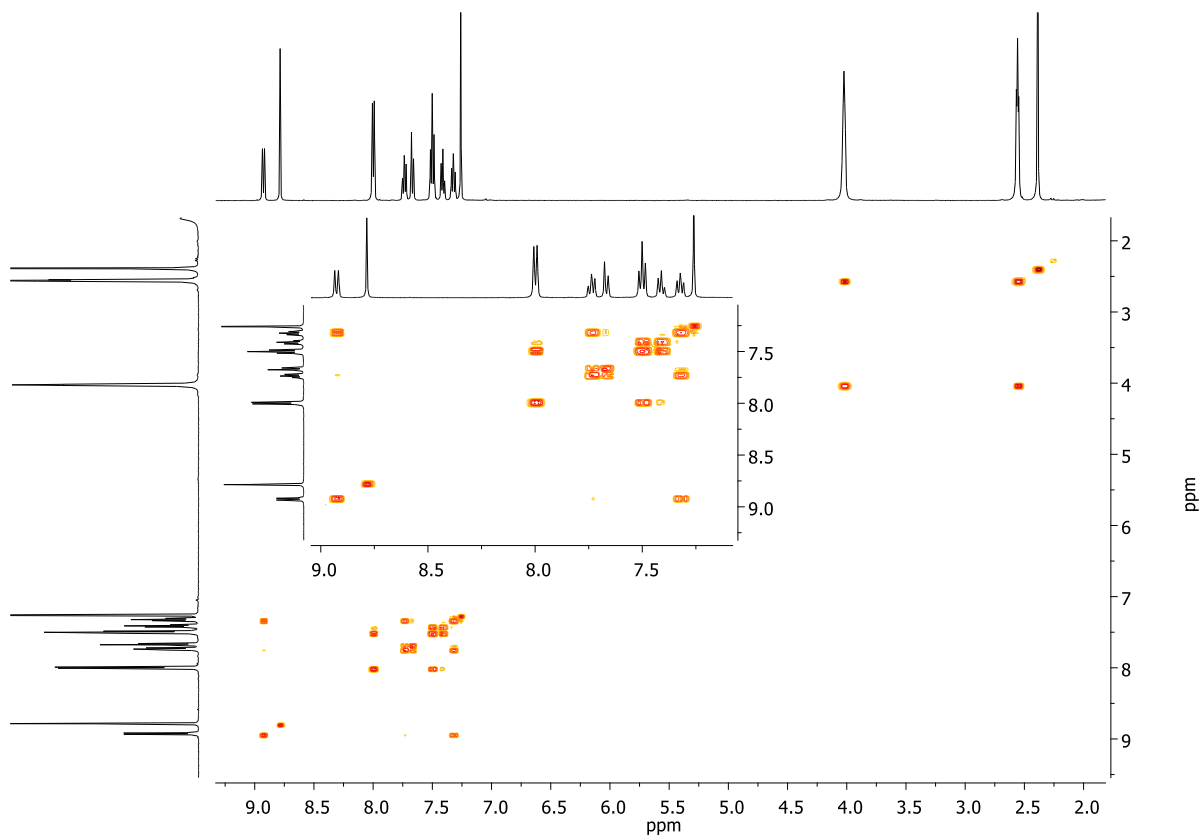

**4-[4-(3-Cyanoprop-1-yl)-1H-1,2,3-triazol-1-yl]-2-(piperidin-1-yl)quinazoline (14c)**

**<sup>1</sup>H-NMR (500 MHz, CDCl<sub>3</sub>) spectrum of compound 14c:**

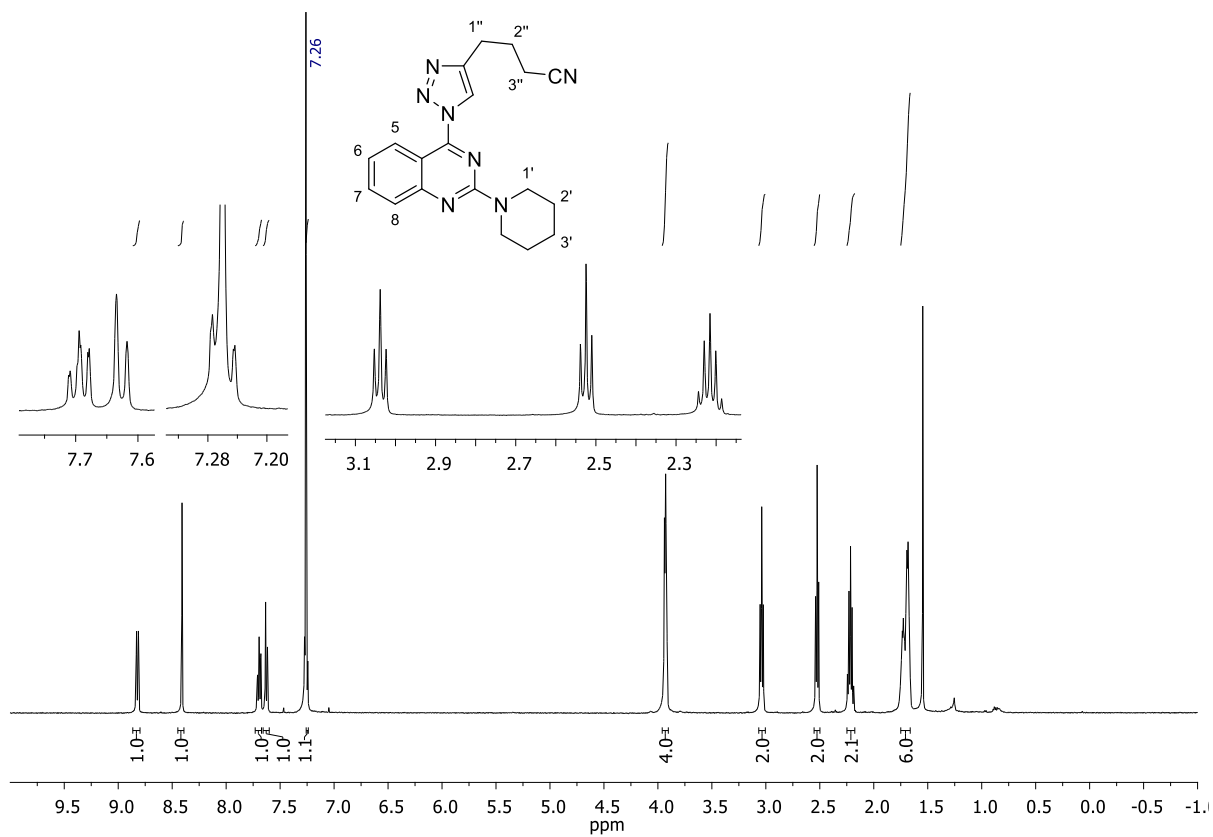

**$^{13}\text{C}$ -NMR (125.7 MHz,  $\text{CDCl}_3$ ) spectrum of compound 14c:**

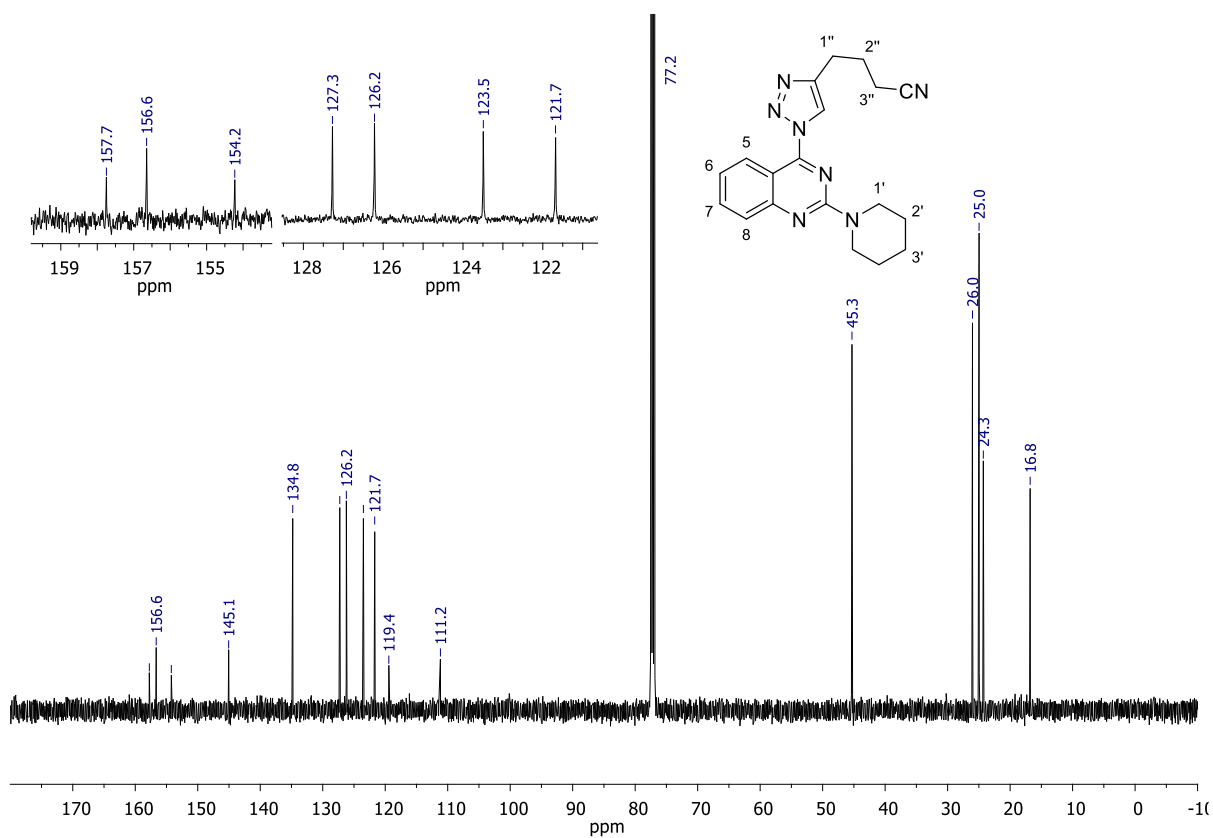

**HSQC spectrum of compound 14c:**

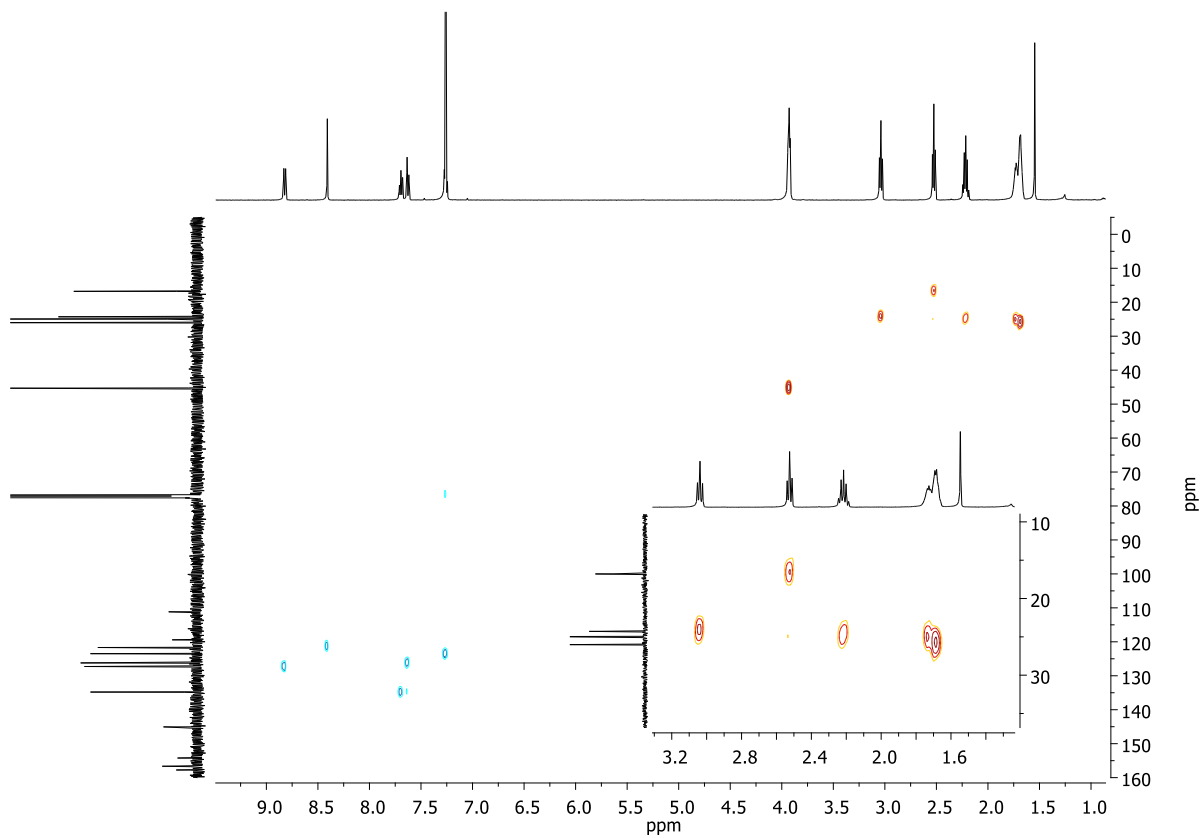

HMBC spectrum of compound 14c:

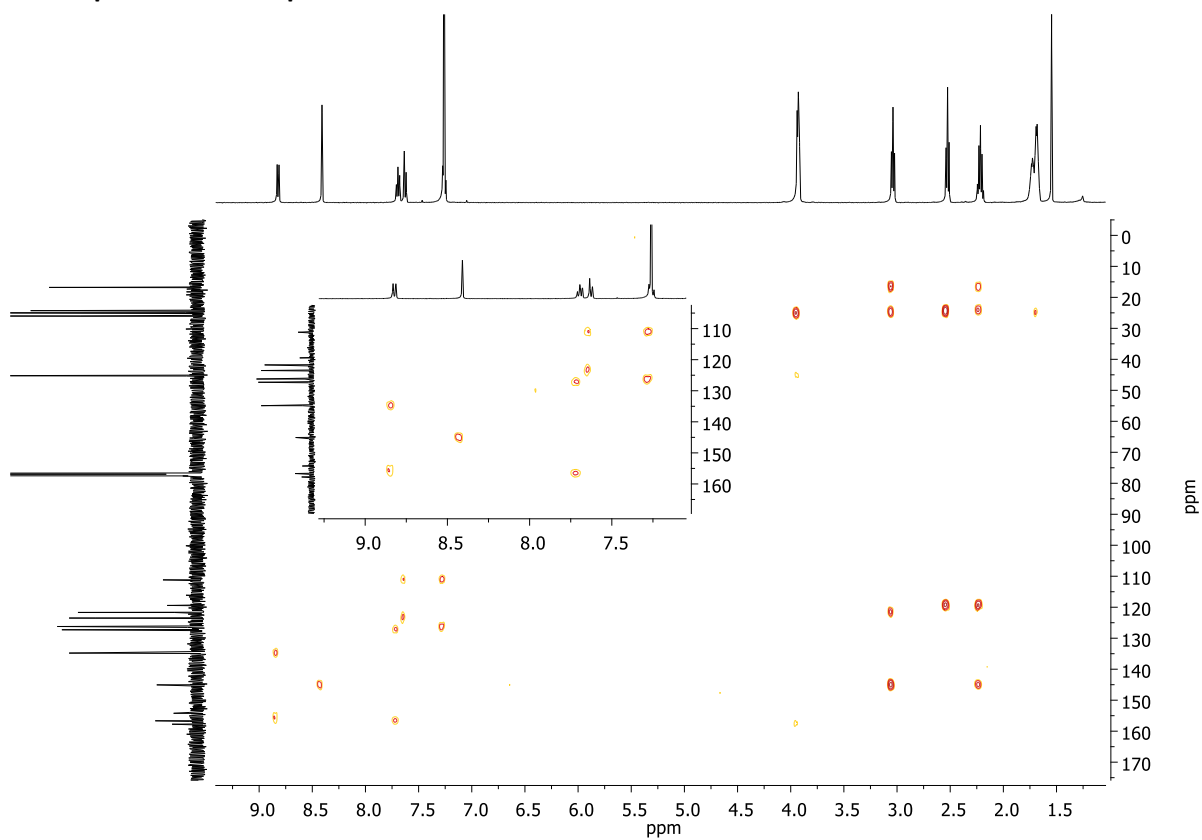

COSY spectrum of compound 14c:

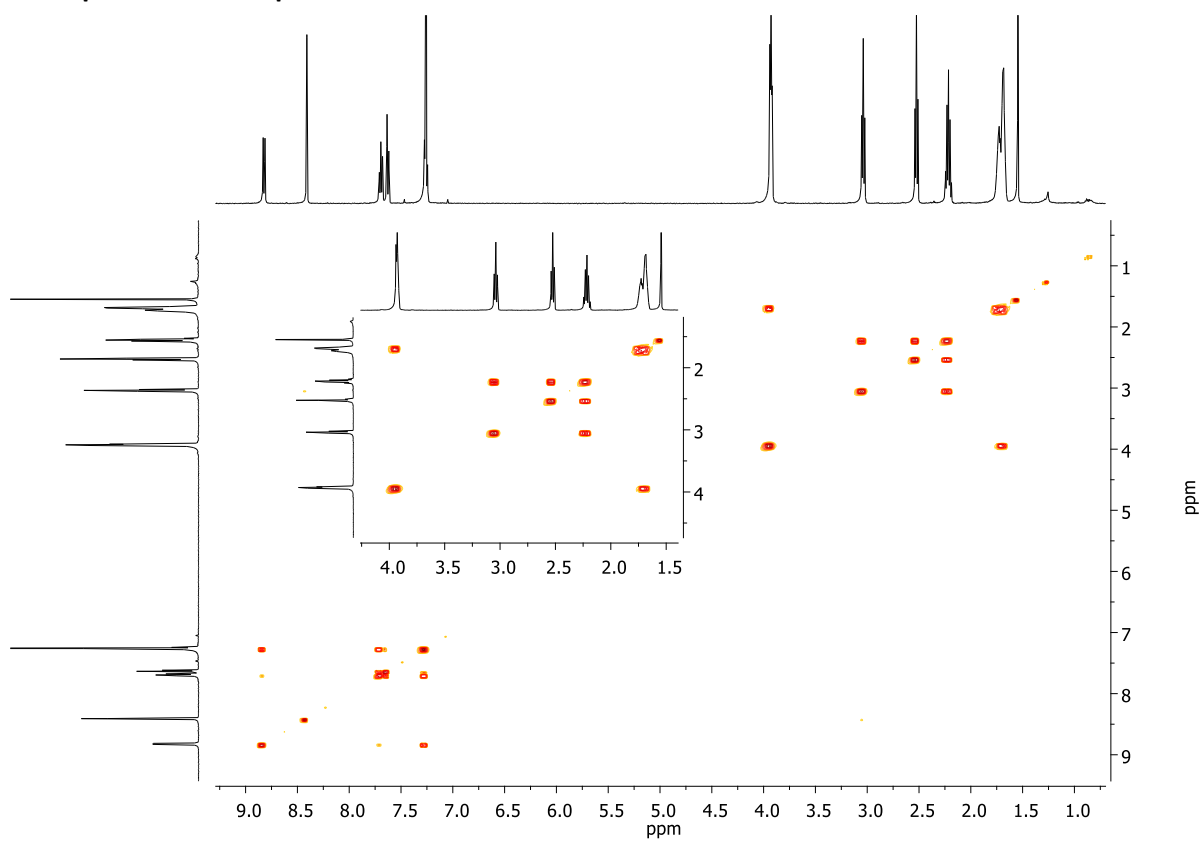



### 4-Amino-2-[(4-chlorophenyl)thio]quinazoline (15)

<sup>1</sup>H-NMR (500 MHz, DMSO-d<sub>6</sub>) spectrum of compound 15:

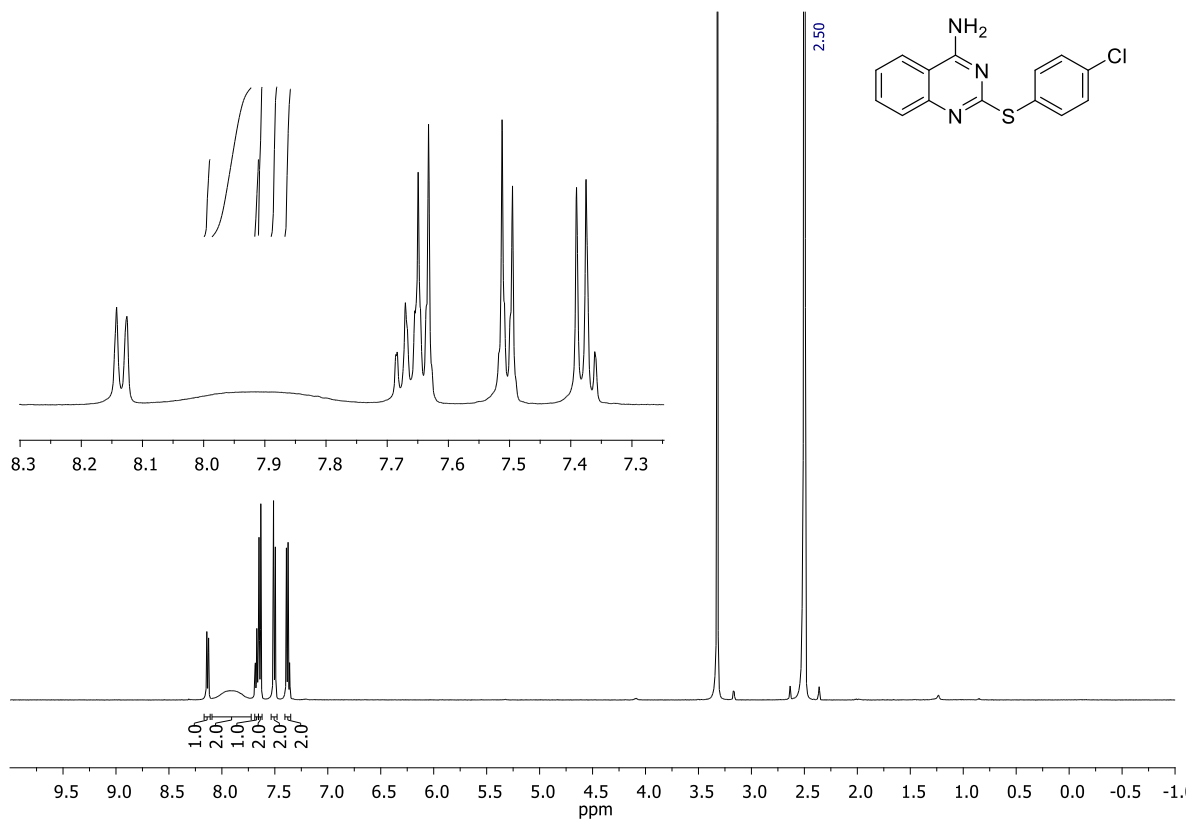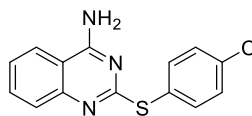

<sup>13</sup>C-NMR (125.7 MHz, DMSO-d<sub>6</sub>) spectrum of compound 15:

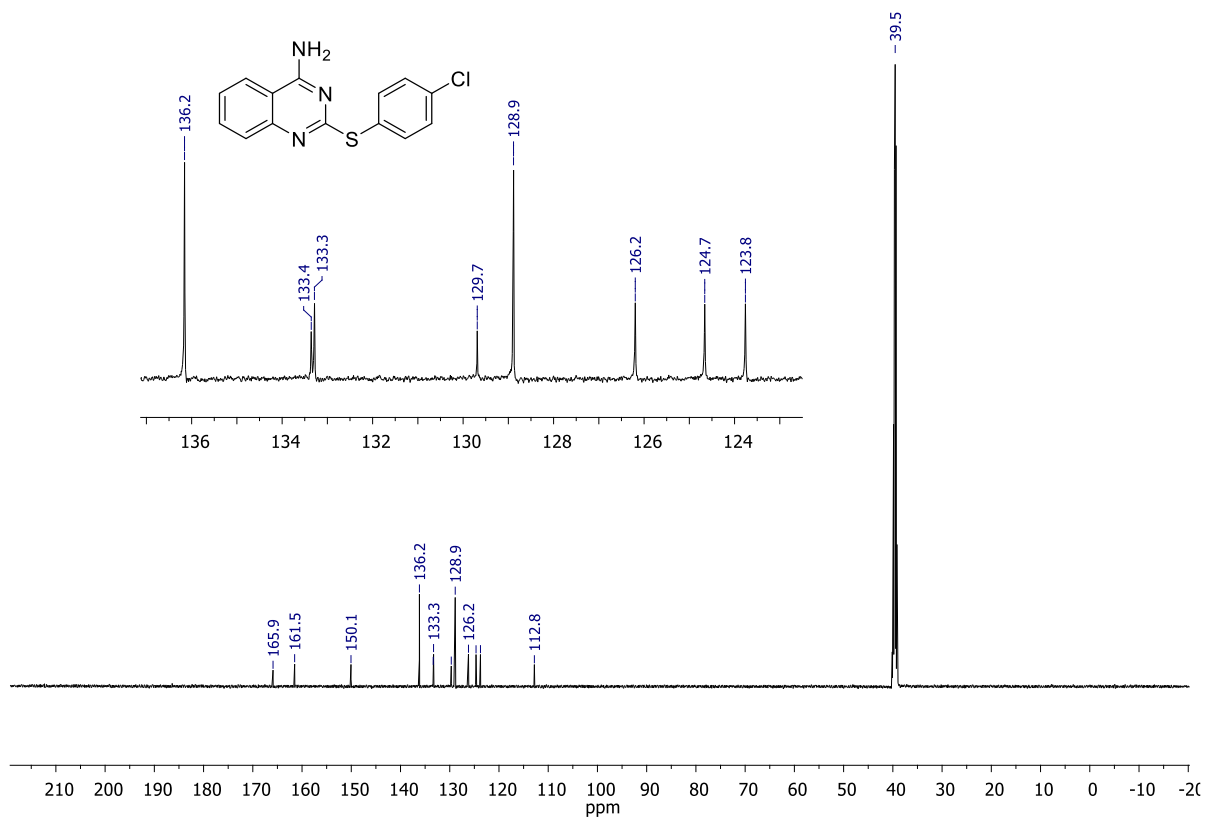

## Quinazoline iminophosphoranes

### 2-[(4-Chlorophenyl)thio]-4-[(tributylphosphoronylidene)amino]quinazoline (16a)

$^1\text{H-NMR}$  (500 MHz,  $\text{CDCl}_3$ ) spectrum of compound 16a:

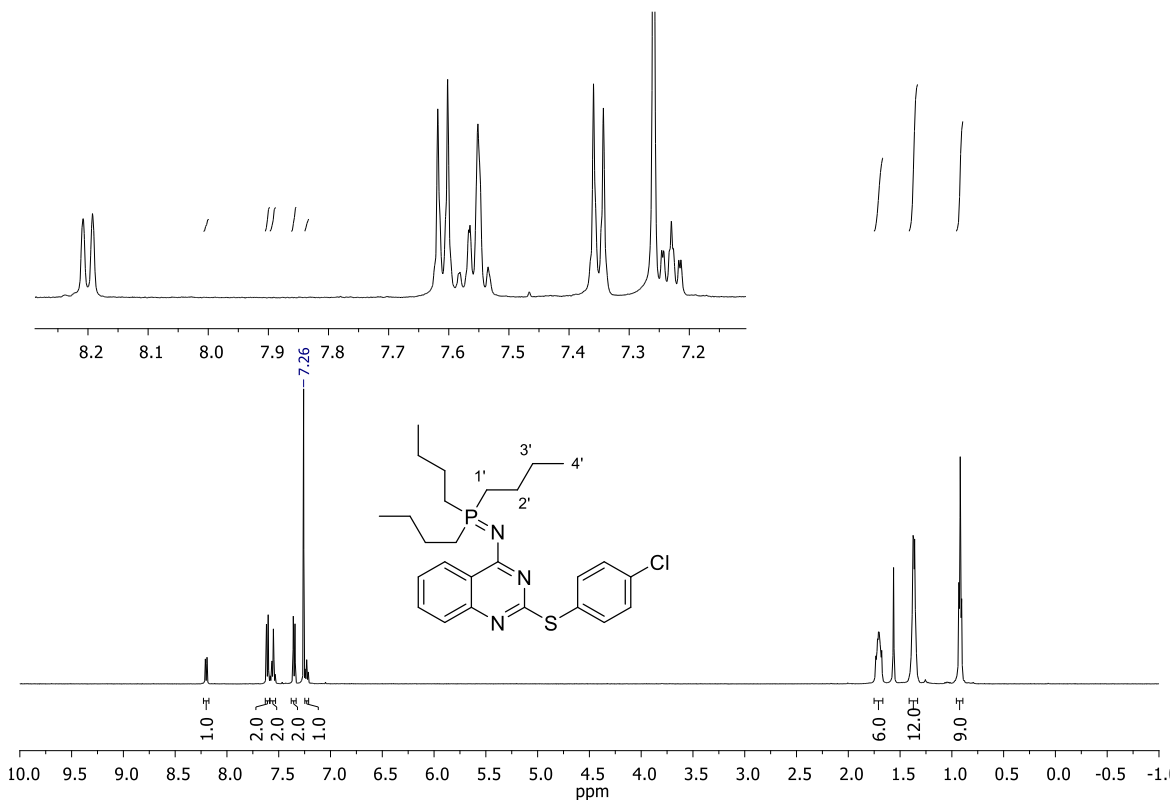

$^{13}\text{C-NMR}$  (125.7 MHz,  $\text{CDCl}_3$ ) spectrum of compound 16a:

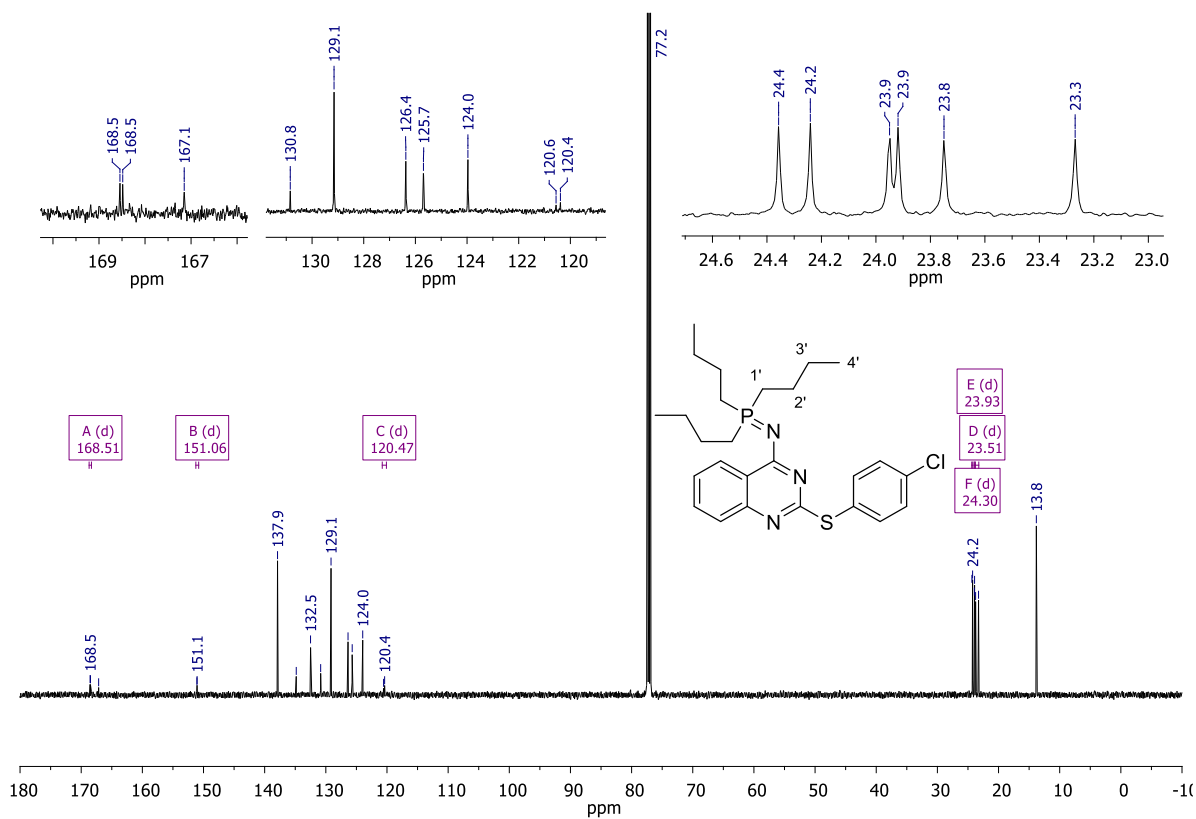

**$^{31}\text{P}$ -NMR (202 MHz,  $\text{CDCl}_3$ ) spectrum of compound 16a:**

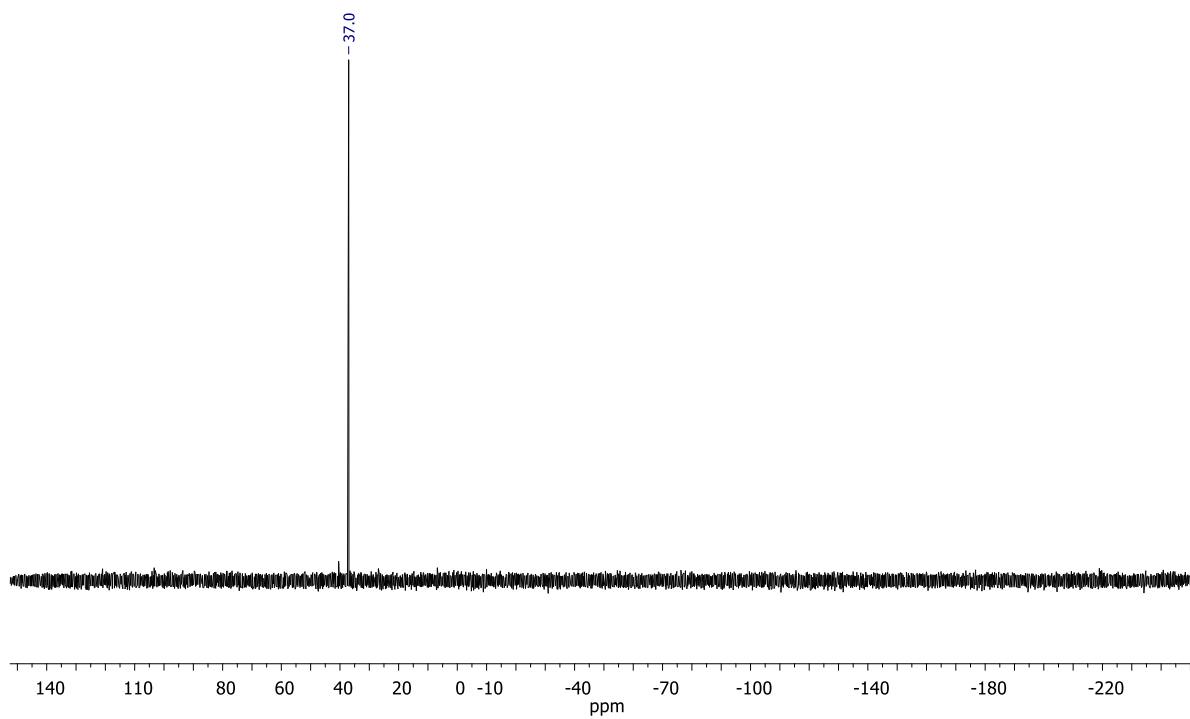

**HSQC spectrum of compound 16a:**

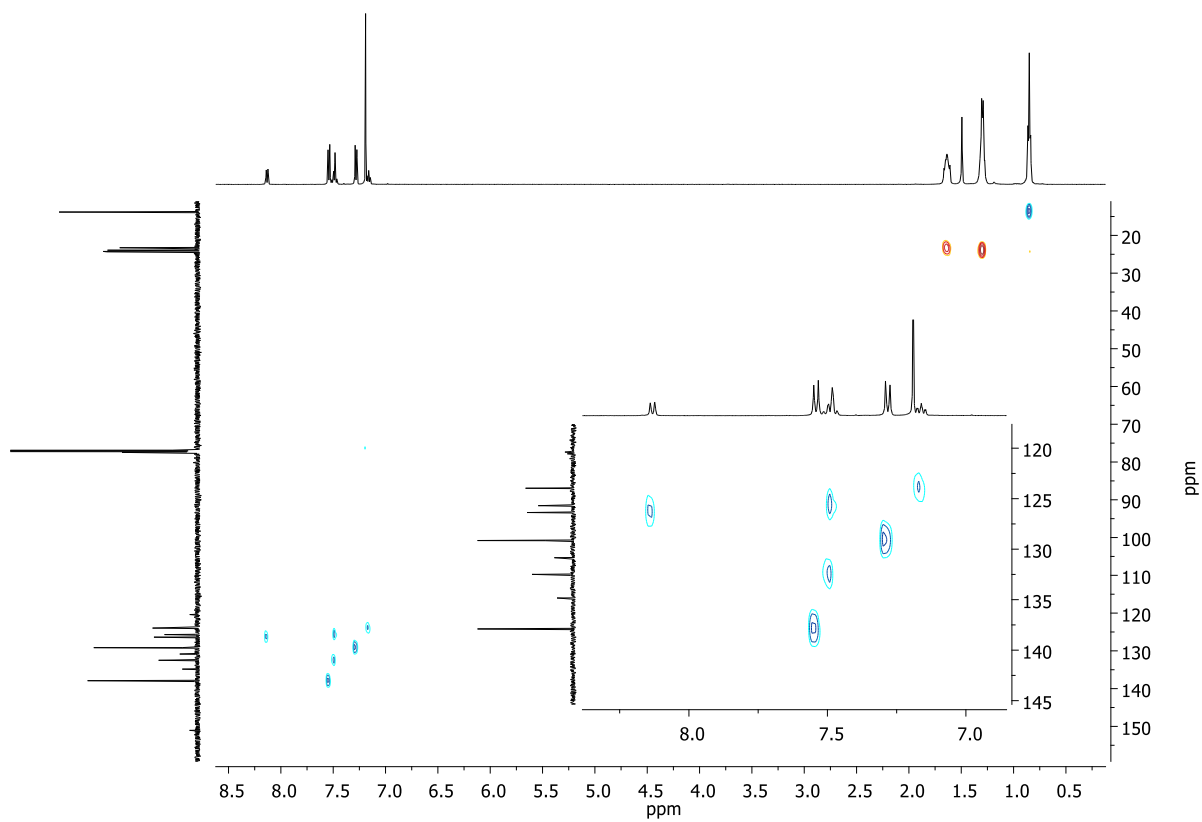

HMBC spectrum of compound 16a:

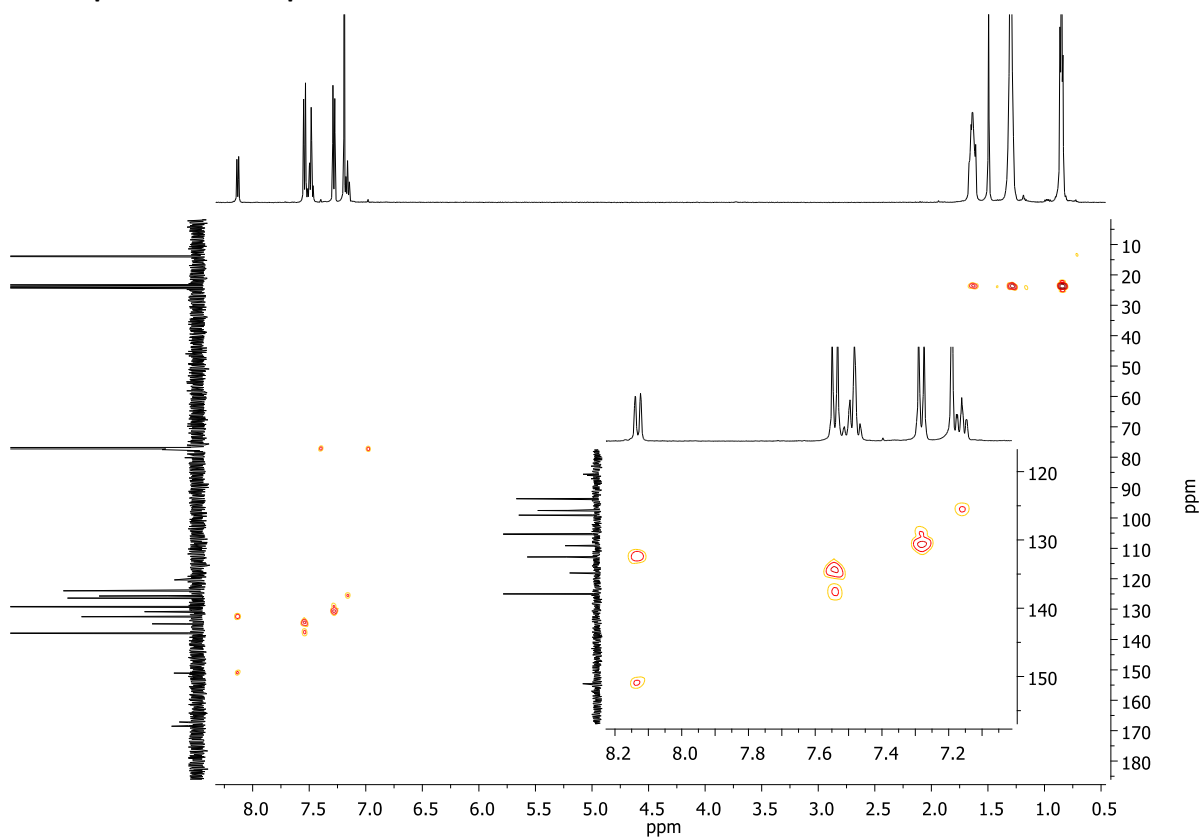

COSY spectrum of compound 16a:

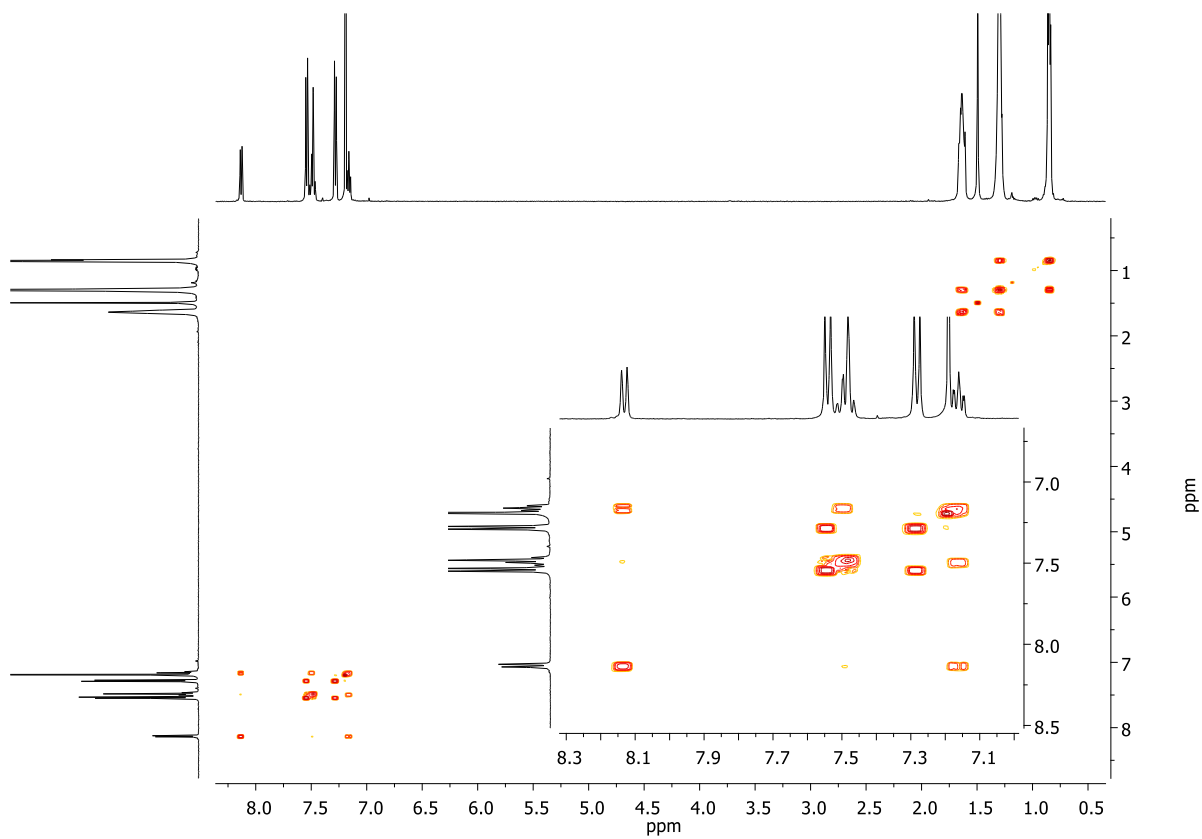

## 2-[(4-Chlorophenyl)thio]-4-[(triphenylphosphoronylidene)amino]quinazoline (16b)

$^1\text{H-NMR}$  (500 MHz,  $\text{CDCl}_3$ ) spectrum of compound 16b:

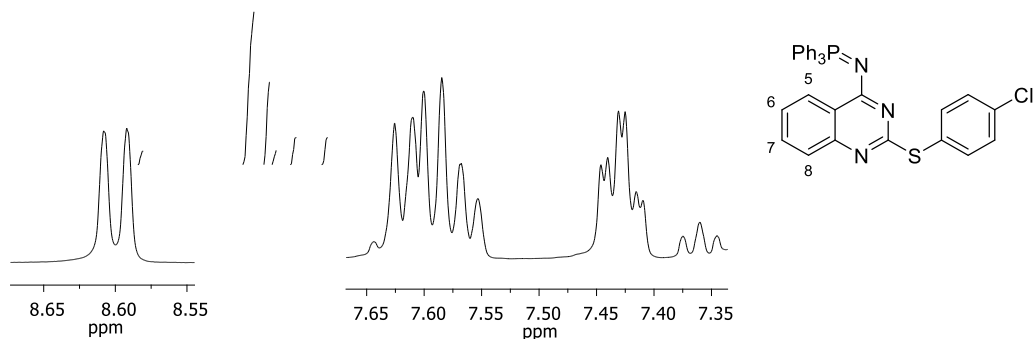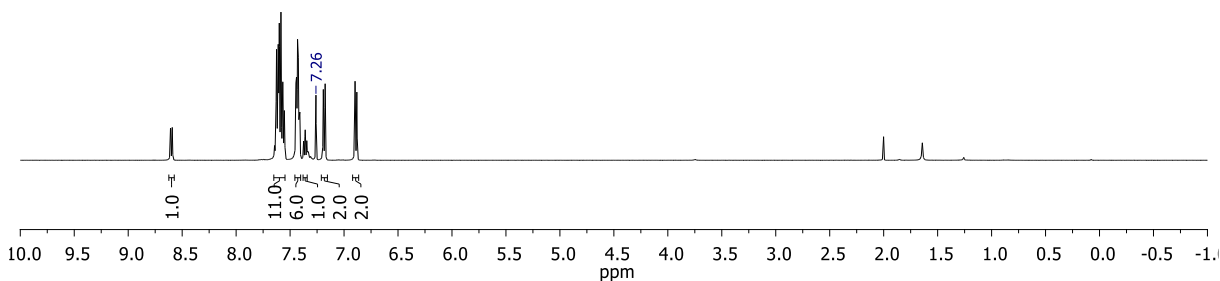

$^{13}\text{C-NMR}$  (125.7 MHz,  $\text{CDCl}_3$ ) spectrum of compound 16b:

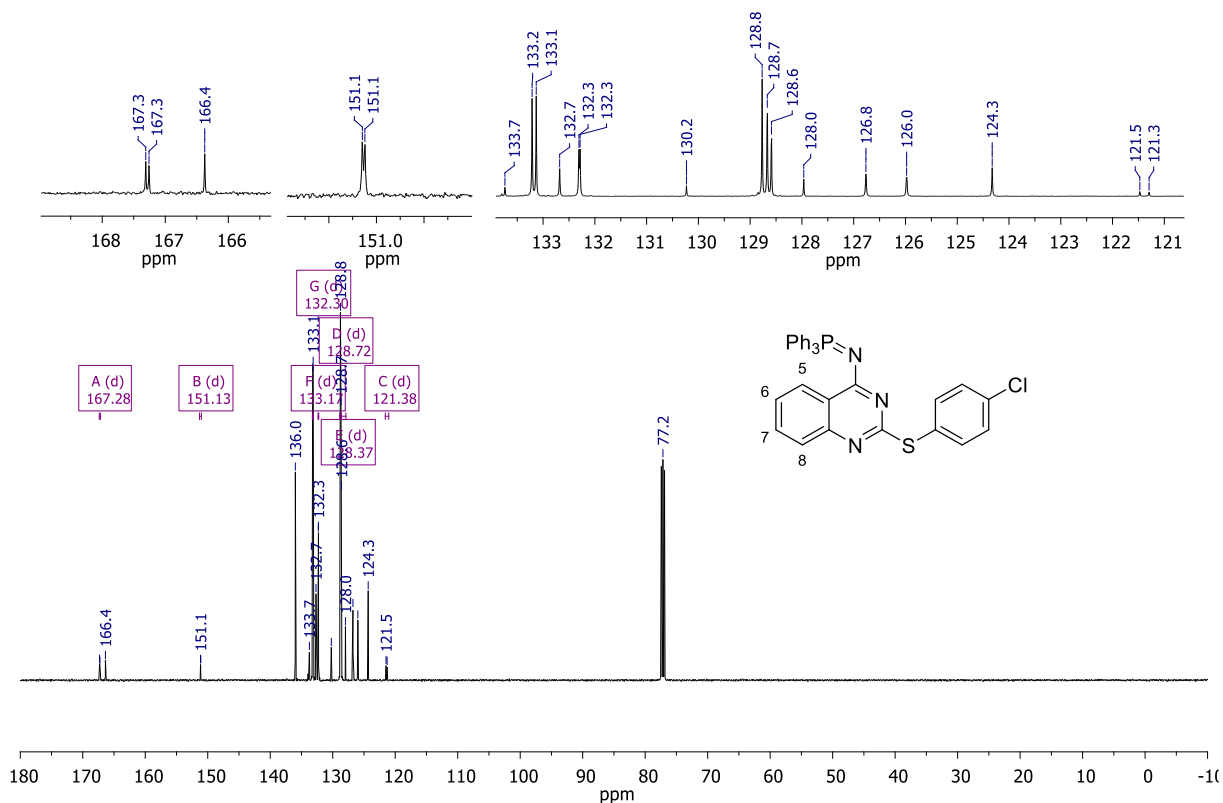

**$^{31}\text{P}$ -NMR (202 MHz,  $\text{CDCl}_3$ ) spectrum of compound 16b:**

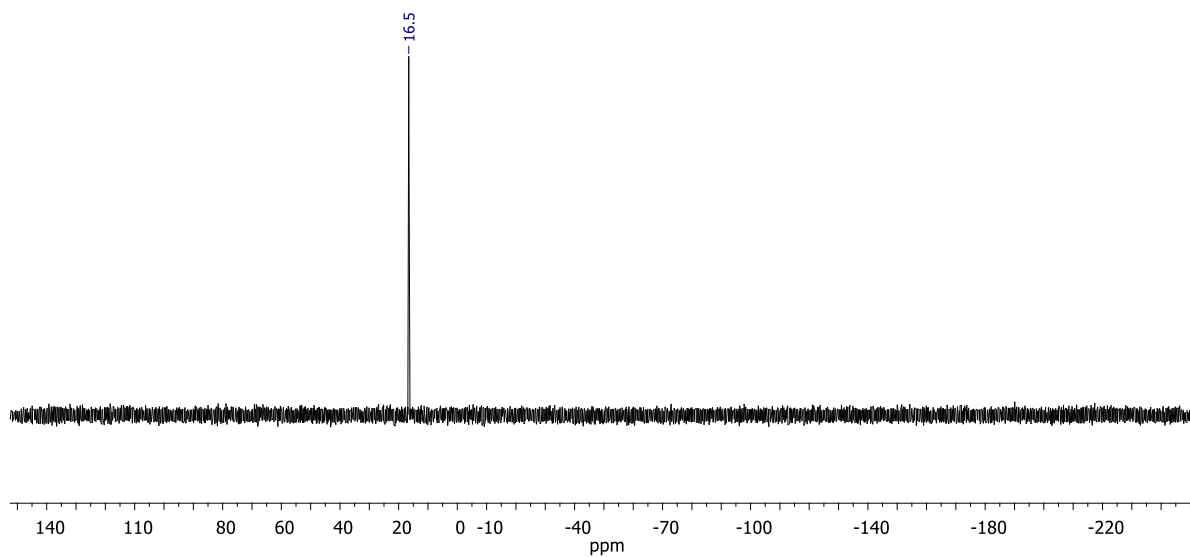

**HSQC spectrum of compound 16b:**

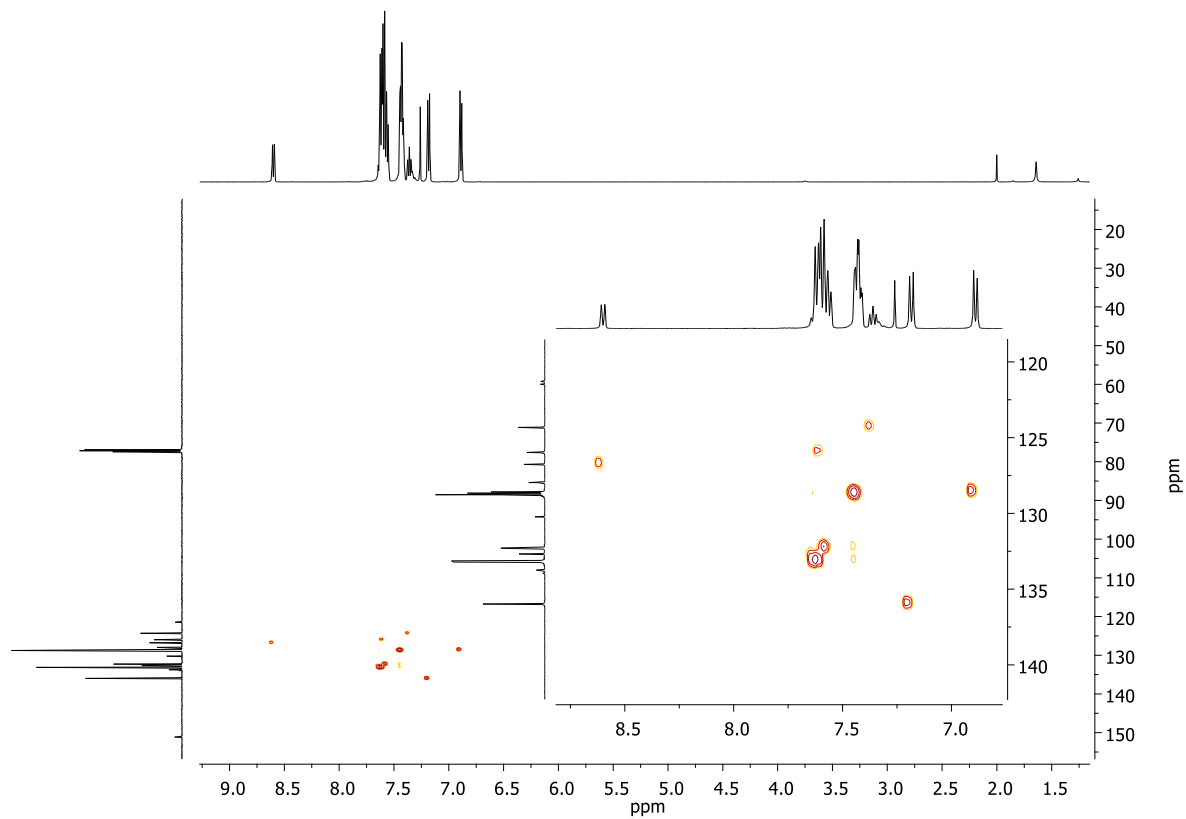

HMBC spectrum of compound 16b:

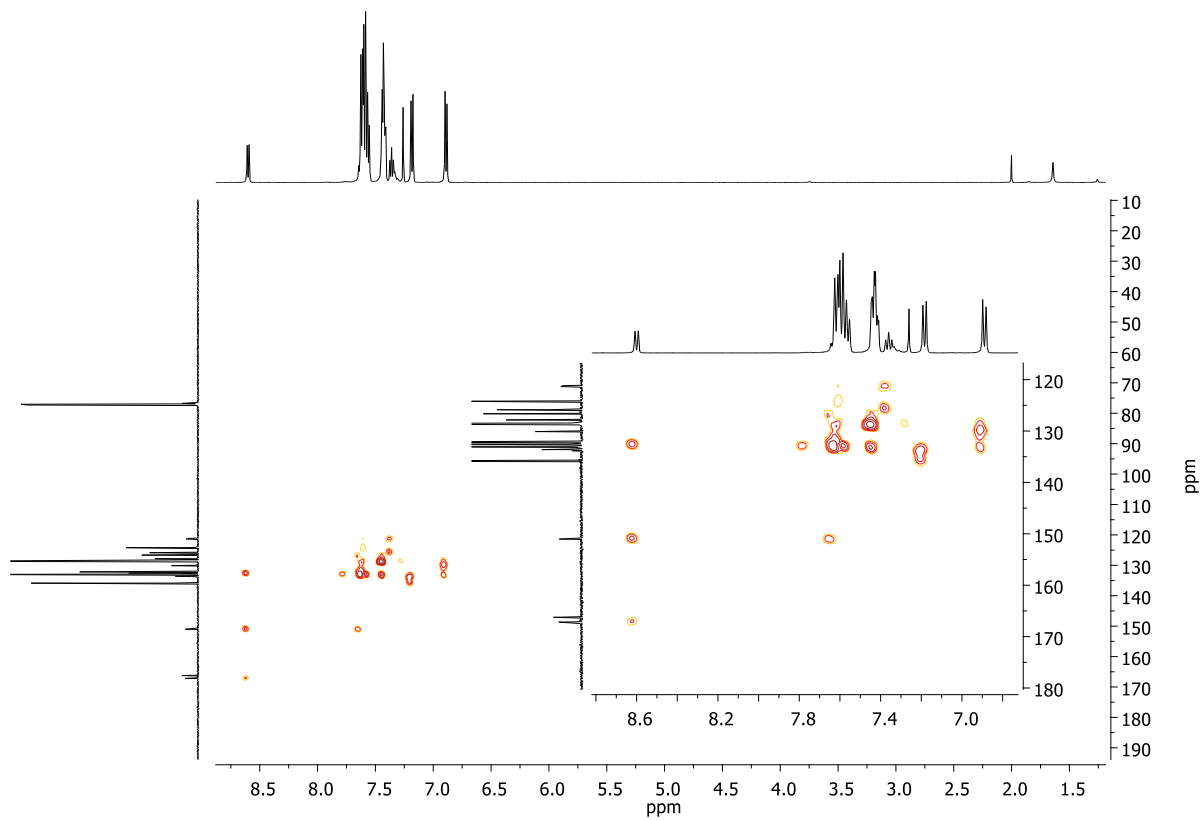

COSY spectrum of compound 16b:

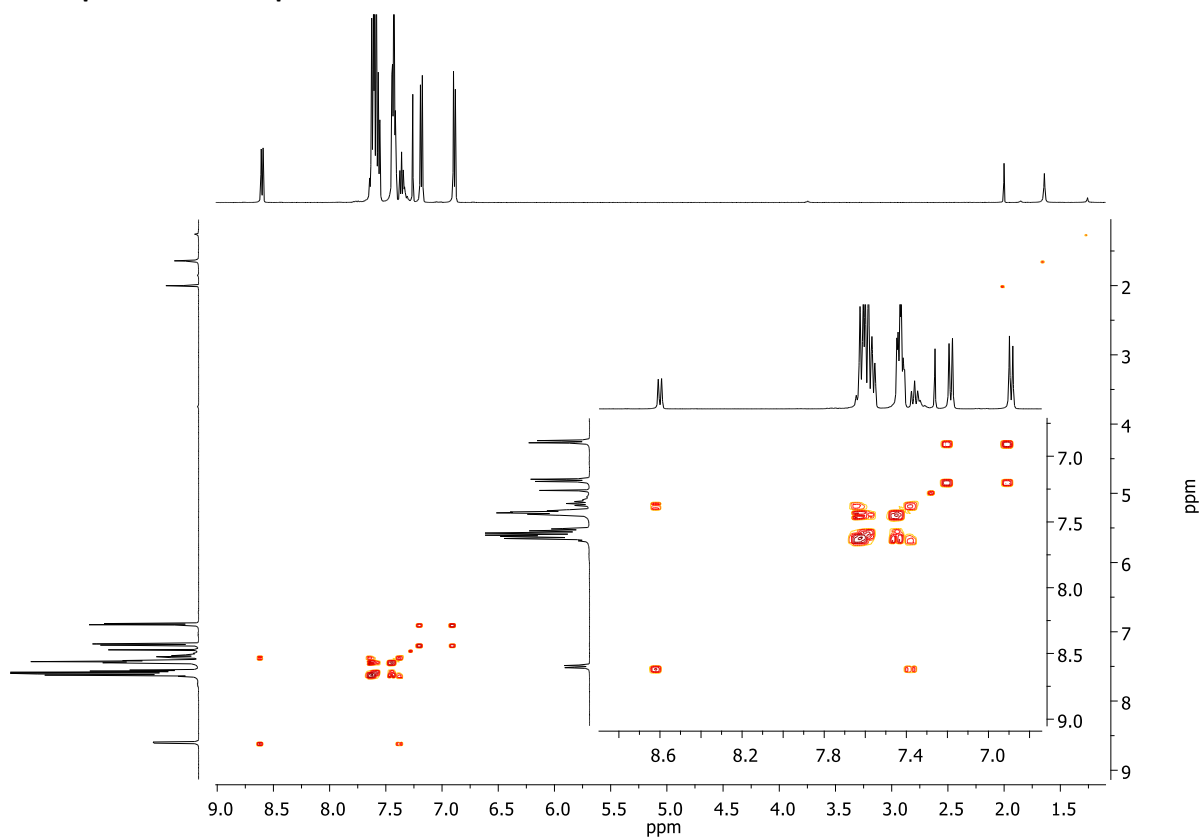

# 4-(Alkyl/Aryloxy)-2-(1*H*-1,2,3-triazol-1-yl)quinazolines

## 2-(4-Cyclopropyl-1*H*-1,2,3-triazol-1-yl)-4-(phenyloxy)quinazoline (17a)

<sup>1</sup>H-NMR (500 MHz, CDCl<sub>3</sub>) spectrum of compound 17a:

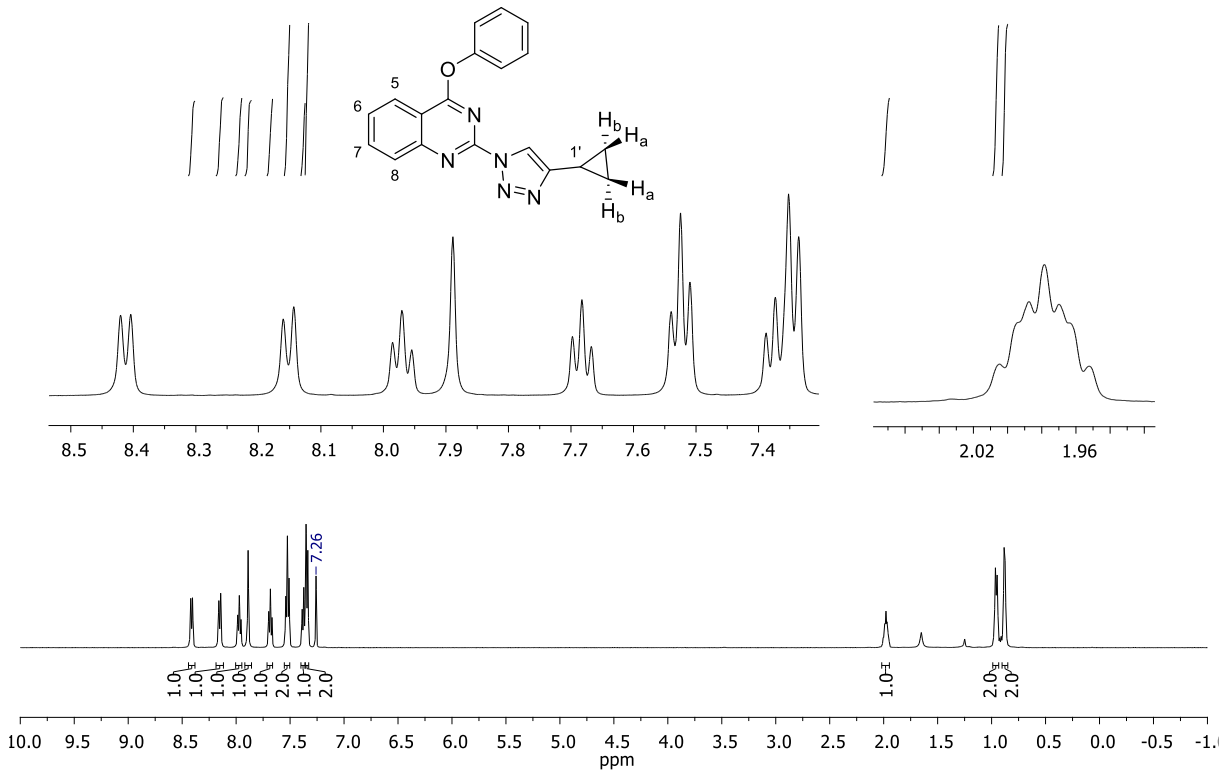

<sup>13</sup>C-NMR (125.7 MHz, CDCl<sub>3</sub>) spectrum of compound 17a:

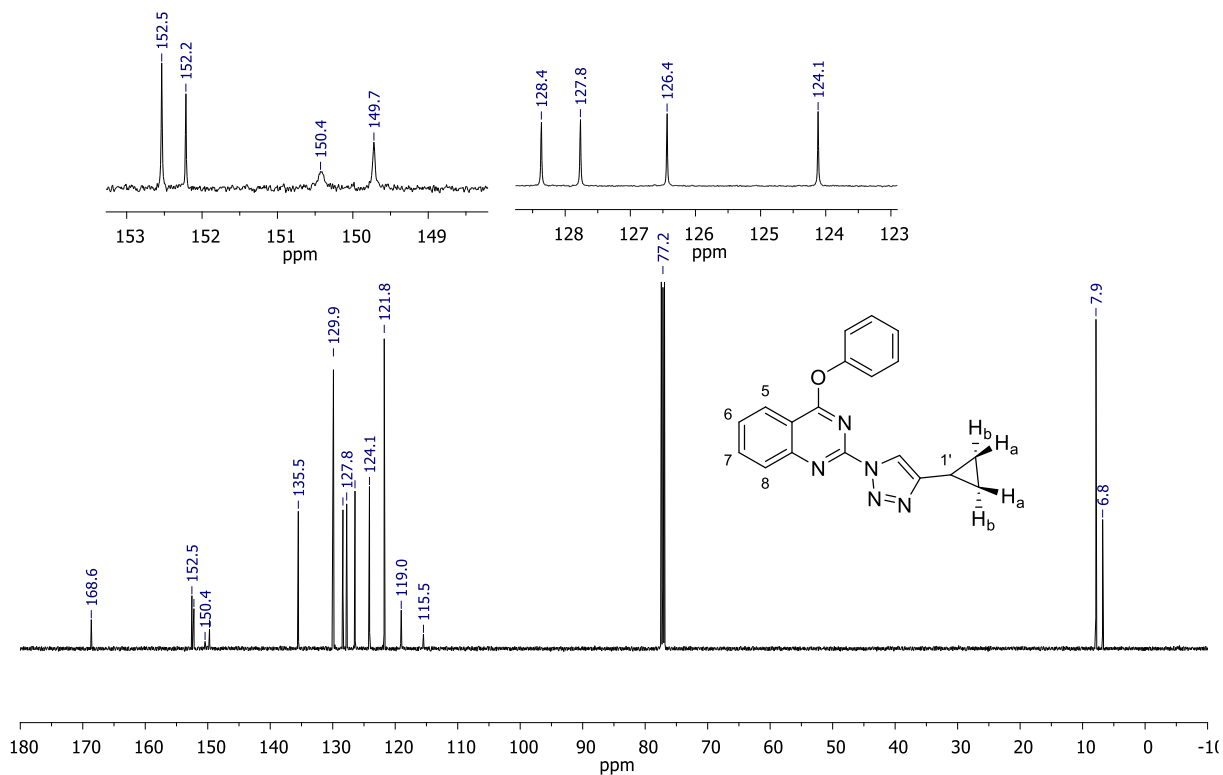



HSQC spectrum of compound 17a:

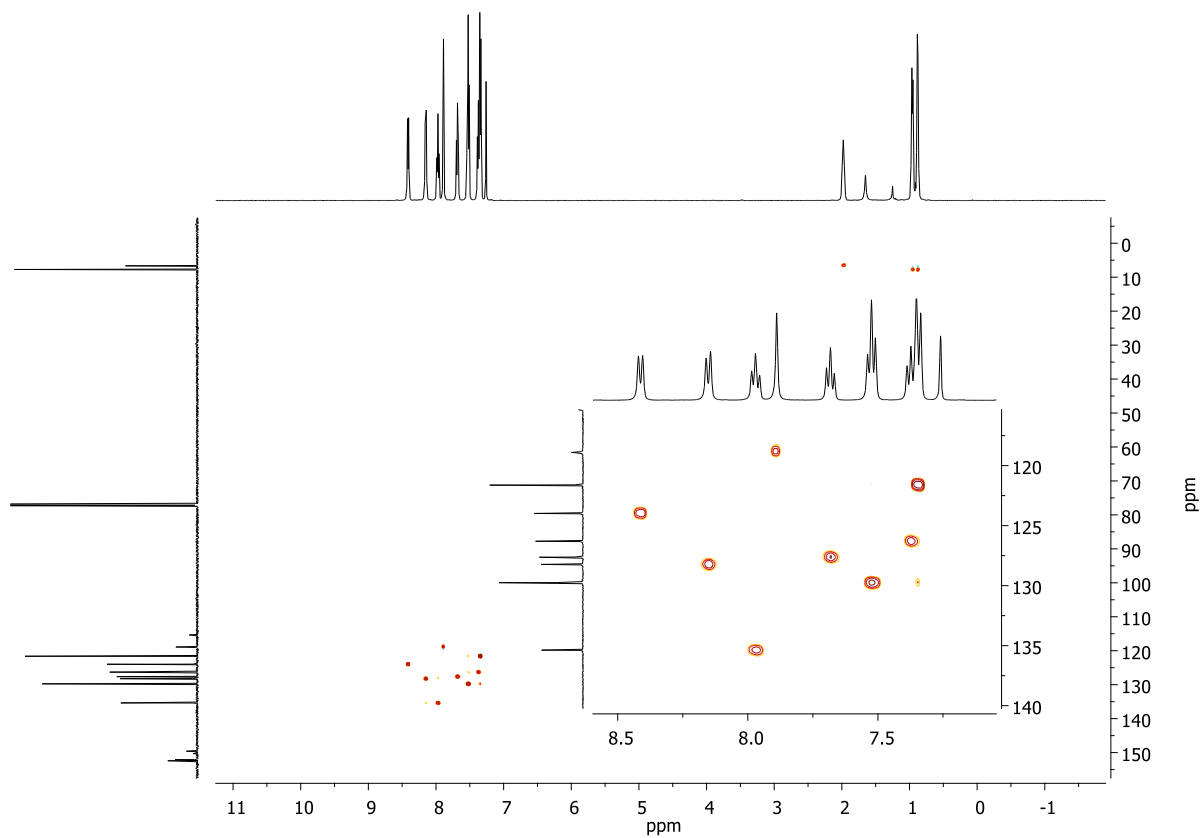

HMBC spectrum of compound 17a:

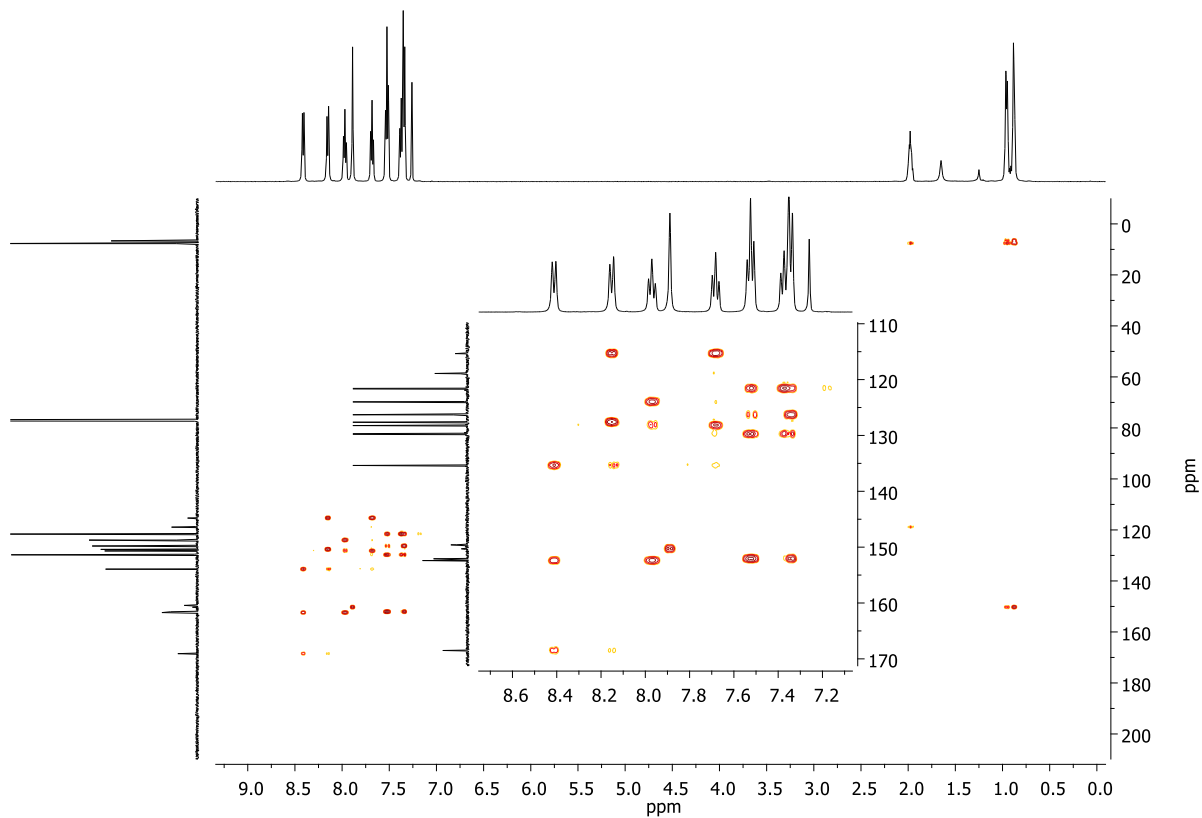

COSY spectrum of compound 17a:

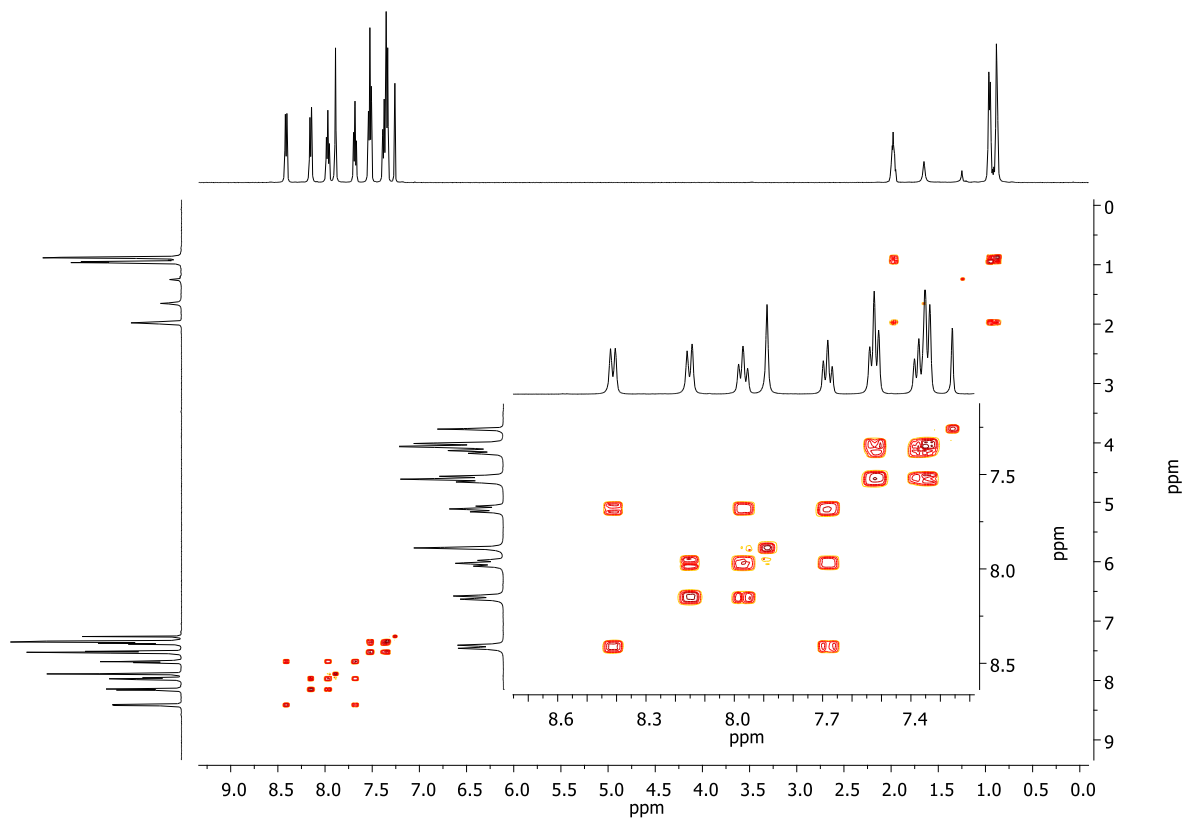

### 4-(Benzyloxy)-2-(4-phenyl-1H-1,2,3-triazol-1-yl)quinazoline (17b)

<sup>1</sup>H-NMR (500 MHz, CDCl<sub>3</sub>) spectrum of compound 17b:

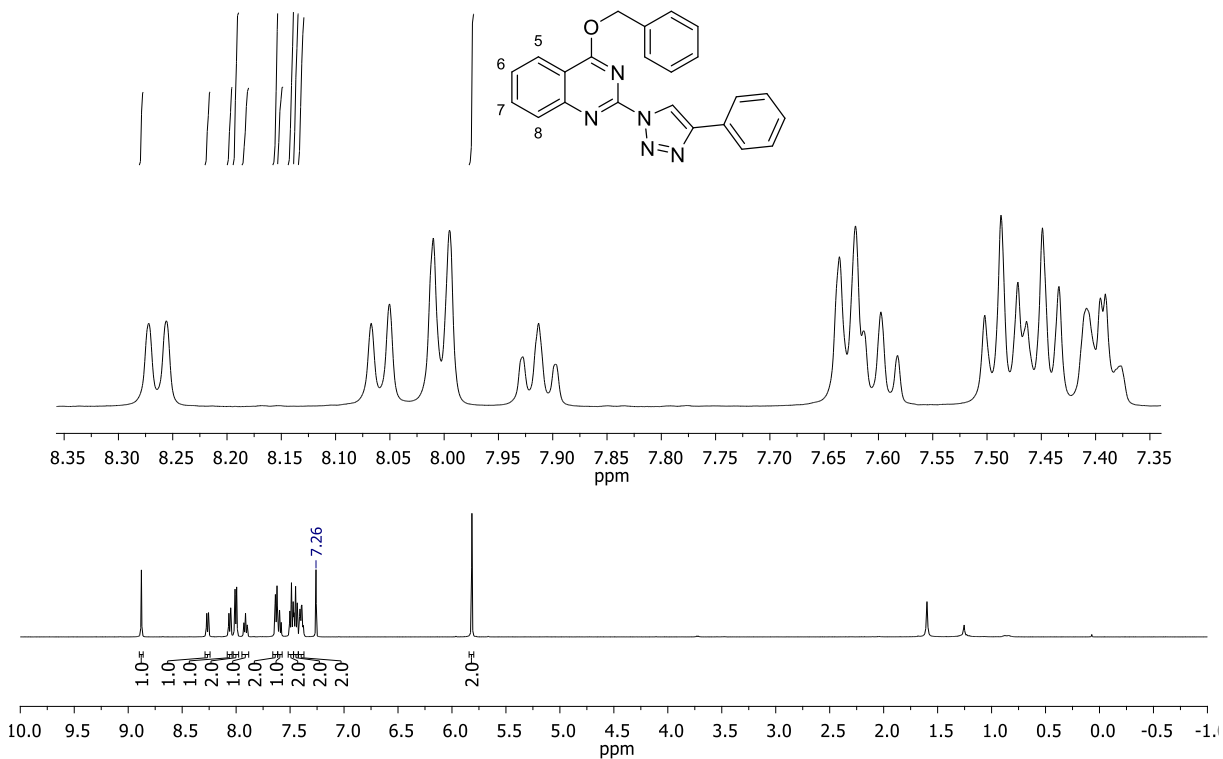

<sup>13</sup>C-NMR (125.7 MHz, CDCl<sub>3</sub>) spectrum of compound 17b:

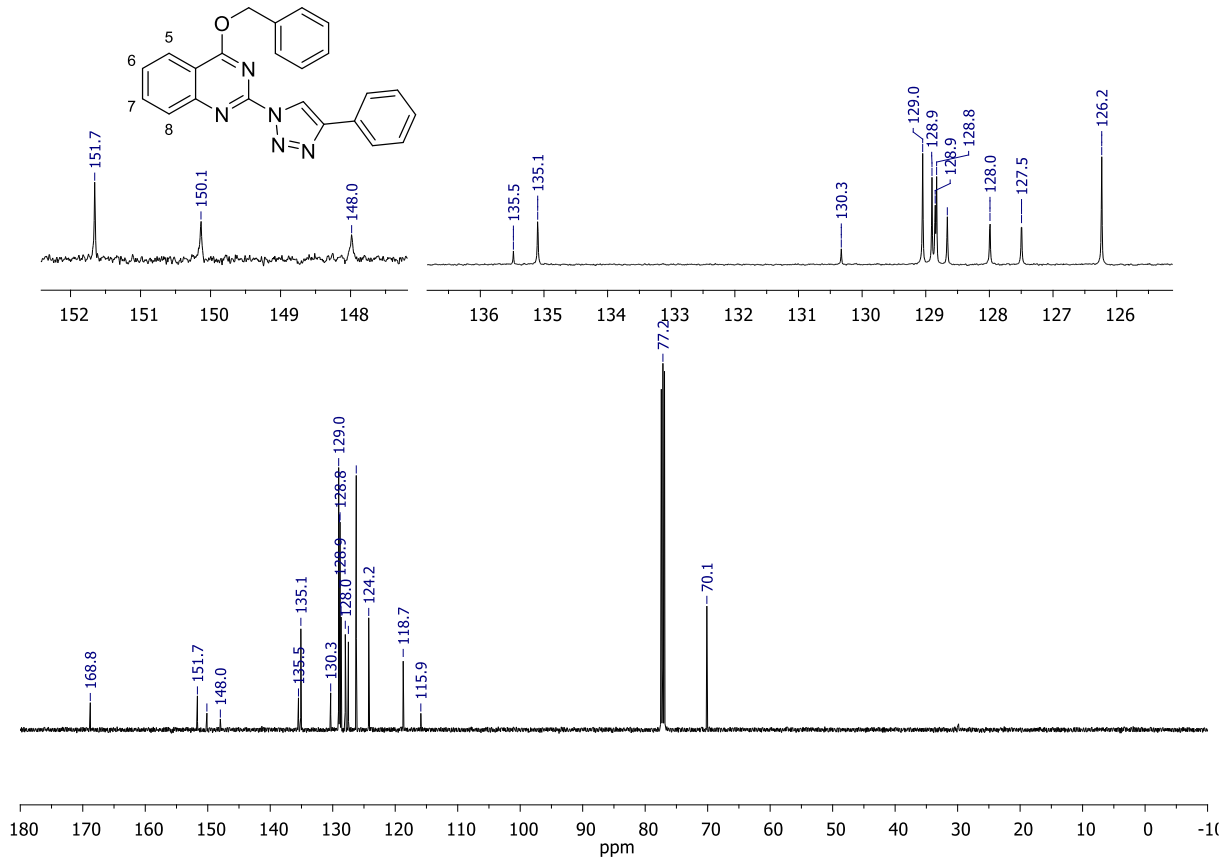

HSQC spectrum of compound 17b:

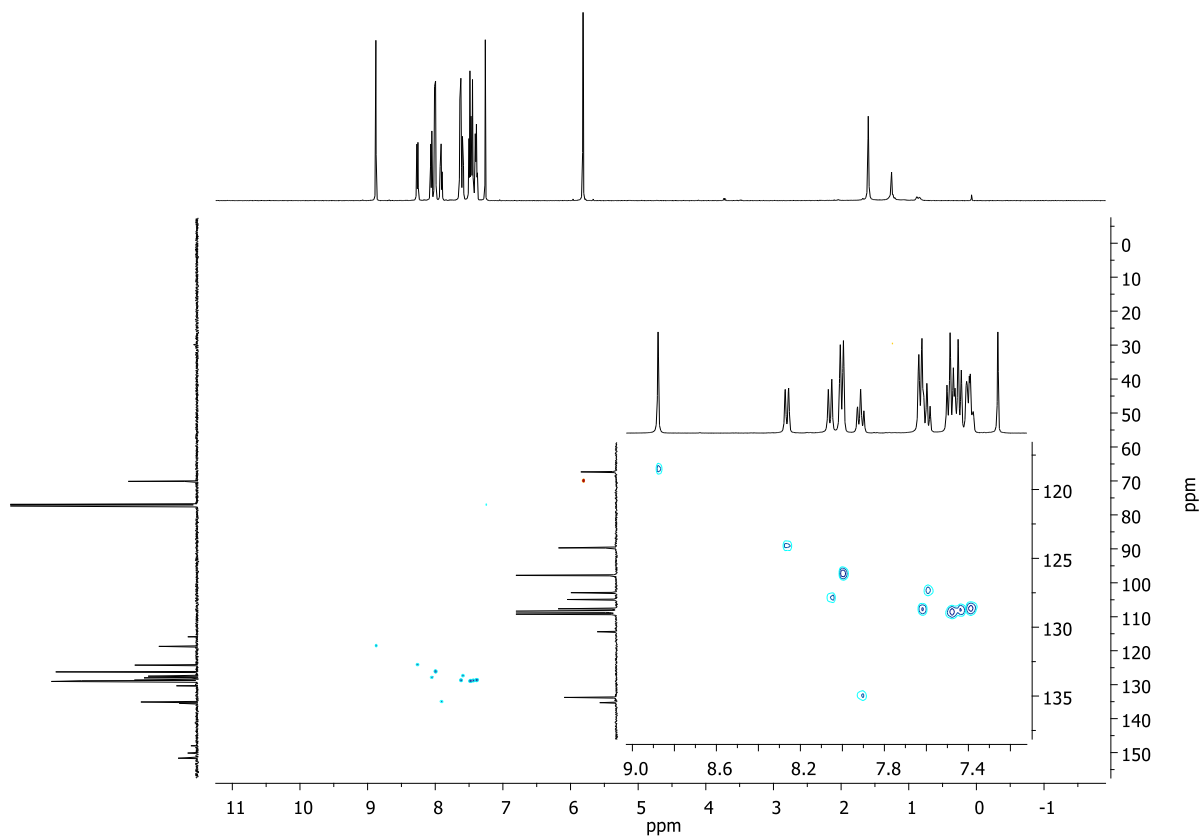

HMBC spectrum of compound 17b:

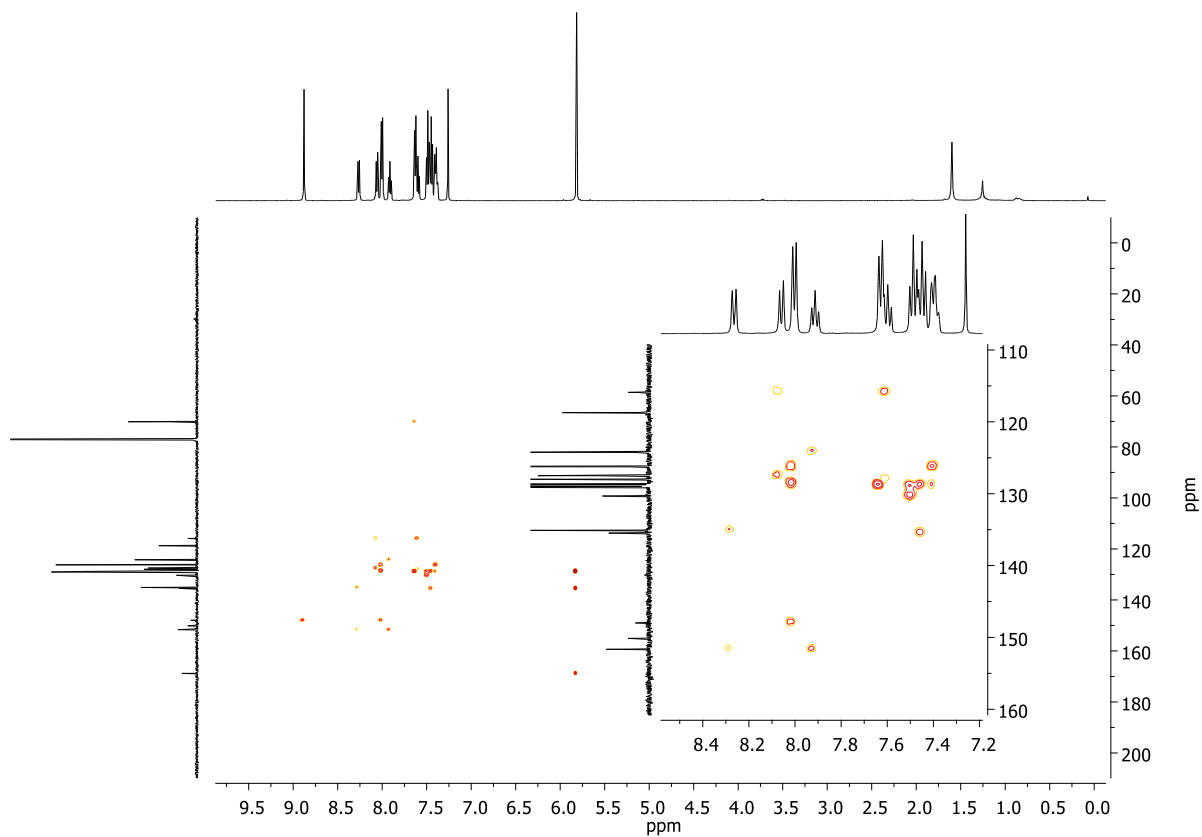

COSY spectrum of compound 17b:

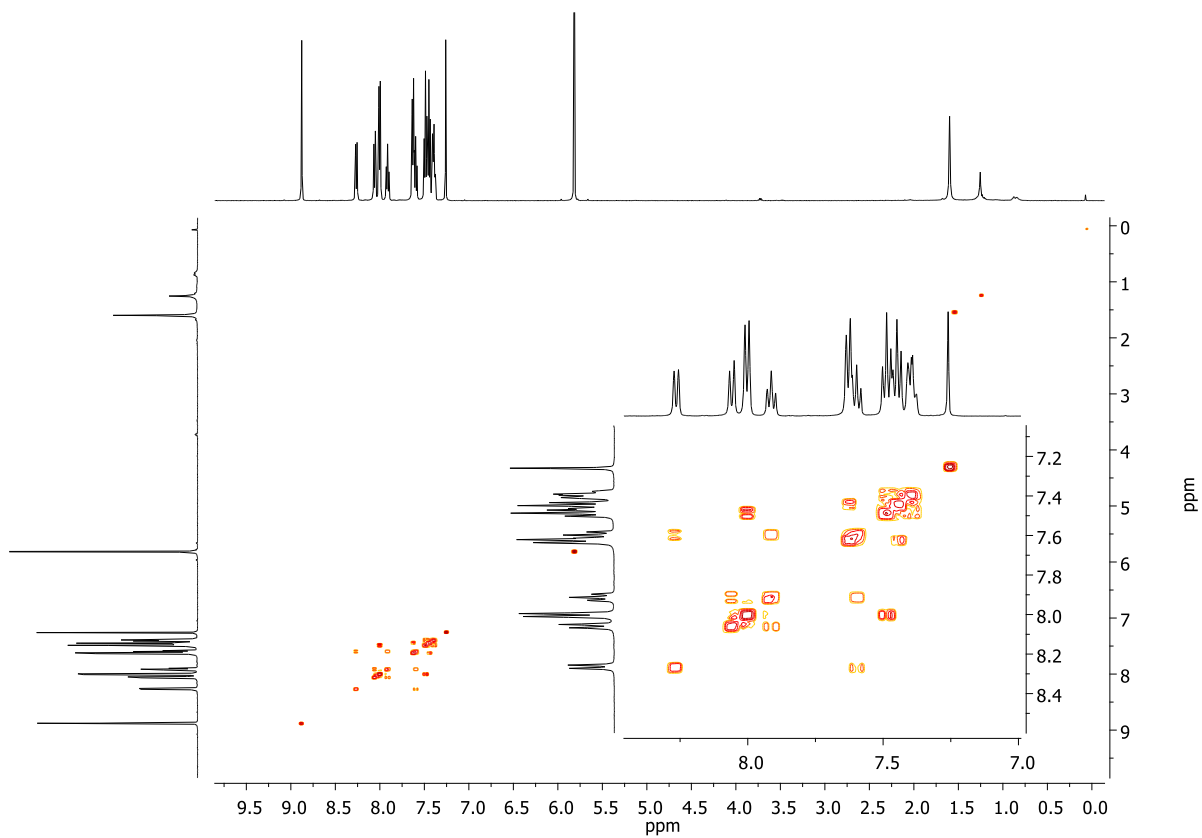

## Azide-tetrazole equilibrium studies

**Table 1.** Amount of azide (A) and tetrazole (T) forms (%) of compound 4d in different solvents and temperatures (300 MHz, 3 sets of measurements with standard deviation  $\Delta s$ ).

|                                 |                                 | Solvent                          |             | CDCl <sub>3</sub> | DMSO-d <sub>6</sub> | Acetic acid-d <sub>4</sub> | Acetone-d <sub>6</sub> | CD <sub>3</sub> CN | THF-d <sub>8</sub> |
|---------------------------------|---------------------------------|----------------------------------|-------------|-------------------|---------------------|----------------------------|------------------------|--------------------|--------------------|
|                                 |                                 | Dielectric constant $\epsilon^1$ |             | 4.8               | 46.7                | 6.1                        | 20.7                   | 37.5               | 7.6                |
|                                 |                                 | lg $\epsilon$                    |             | 0.68              | 1.67                | 0.79                       | 1.32                   | 1.57               | 0.88               |
| <b>T, °C</b>                    | <b>22</b>                       | <b>1</b>                         | T, %        | 72                | 94                  | 51                         | 86                     | 91                 | 77                 |
|                                 |                                 |                                  | A, %        | 28                | 6                   | 49                         | 14                     | 9                  | 23                 |
|                                 |                                 | <b>2</b>                         | T, %        | 75                | 94                  | 50                         | 84                     | 90                 | 77                 |
|                                 |                                 |                                  | A, %        | 25                | 6                   | 50                         | 16                     | 10                 | 23                 |
|                                 |                                 | <b>3</b>                         | T, %        | 75                | 94                  | 51                         | 83                     | 90                 | 75                 |
|                                 |                                 |                                  | A, %        | 25                | 6                   | 49                         | 17                     | 10                 | 25                 |
|                                 |                                 | <b>Average</b>                   | T, %        | <b>74.0</b>       | <b>94.0</b>         | <b>50.7</b>                | <b>84.3</b>            | <b>90.3</b>        | <b>76.3</b>        |
|                                 |                                 |                                  | A, %        | <b>26.0</b>       | <b>6.0</b>          | <b>49.3</b>                | <b>15.7</b>            | <b>9.7</b>         | <b>23.7</b>        |
|                                 | <b><math>\Delta s</math>, %</b> |                                  | 1.73        | 0.00              | 0.58                | 1.53                       | 0.58                   | 1.15               |                    |
|                                 | <b>30</b>                       | <b>1</b>                         | T, %        | 69                | 93                  | 49                         | 84                     | 89                 | 74                 |
|                                 |                                 |                                  | A, %        | 31                | 7                   | 51                         | 16                     | 11                 | 26                 |
|                                 |                                 | <b>2</b>                         | T, %        | 72                | 93                  | 50                         | 82                     | 89                 | 74                 |
|                                 |                                 |                                  | A, %        | 28                | 7                   | 50                         | 18                     | 11                 | 26                 |
|                                 |                                 | <b>3</b>                         | T, %        | 71                | 93                  | 50                         | 80                     | 89                 | 72                 |
|                                 |                                 |                                  | A, %        | 29                | 7                   | 50                         | 20                     | 11                 | 28                 |
|                                 |                                 | <b>Average</b>                   | T, %        | <b>70.7</b>       | <b>93.0</b>         | <b>49.7</b>                | <b>82.0</b>            | <b>89.0</b>        | <b>73.3</b>        |
|                                 |                                 |                                  | A, %        | <b>29.3</b>       | <b>7.0</b>          | <b>50.3</b>                | <b>18.0</b>            | <b>11.0</b>        | <b>26.7</b>        |
|                                 | <b><math>\Delta s</math>, %</b> |                                  | 1.53        | 0.00              | 0.58                | 2.00                       | 0.00                   | 1.15               |                    |
|                                 | <b>40</b>                       | <b>1</b>                         | T, %        | 65                | 92                  | 47                         | 80                     | 87                 | 70                 |
|                                 |                                 |                                  | A, %        | 35                | 8                   | 53                         | 20                     | 13                 | 30                 |
|                                 |                                 | <b>2</b>                         | T, %        | 66                | 91                  | 47                         | 79                     | 87                 | 69                 |
|                                 |                                 |                                  | A, %        | 34                | 9                   | 53                         | 21                     | 13                 | 31                 |
|                                 |                                 | <b>3</b>                         | T, %        | 69                | 91                  | 48                         | 77                     | 87                 | 68                 |
|                                 |                                 |                                  | A, %        | 31                | 9                   | 52                         | 23                     | 13                 | 32                 |
| <b>Average</b>                  |                                 | T, %                             | <b>66.7</b> | <b>91.3</b>       | <b>47.3</b>         | <b>78.7</b>                | <b>87.0</b>            | <b>69.0</b>        |                    |
|                                 |                                 | A, %                             | <b>33.3</b> | <b>8.7</b>        | <b>52.7</b>         | <b>21.3</b>                | <b>13.0</b>            | <b>31.0</b>        |                    |
| <b><math>\Delta s</math>, %</b> |                                 | 2.08                             | 0.58        | 0.58              | 1.53                | 0.00                       | 1.00                   |                    |                    |

<sup>1</sup> O'Neil, M. J.; Heckelman, P. E.; Ko. The Merck Index: An Encyclopedia of Chemicals, Drugs, and Biologicals, 14th Edition. *J. Am. Chem. Soc.* **2007**, 129 (7), 2197–2197.

Table 1 (continued).

|            | Solvent                          |         | CDCl <sub>3</sub> | DMSO-d <sub>6</sub> | Acetic acid-d <sub>4</sub> | Acetone-d <sub>6</sub> | CD <sub>3</sub> CN | THF-d <sub>8</sub> |             |
|------------|----------------------------------|---------|-------------------|---------------------|----------------------------|------------------------|--------------------|--------------------|-------------|
|            | Dielectric constant $\epsilon^1$ |         | 4.8               | 46.7                | 6.1                        | 20.7                   | 37.5               | 7.6                |             |
|            | lg $\epsilon$                    |         | 0.68              | 1.67                | 0.79                       | 1.32                   | 1.57               | 0.88               |             |
| T, °C      | 50                               | 1       | T, %              | 61                  | 90                         | 44                     | 77                 | 84                 | 66          |
|            |                                  |         | A, %              | 39                  | 10                         | 56                     | 23                 | 16                 | 34          |
|            |                                  | 2       | T, %              | 62                  | 91                         | 45                     | 75                 | 86                 | 66          |
|            |                                  |         | A, %              | 38                  | 9                          | 55                     | 25                 | 14                 | 34          |
|            |                                  | 3       | T, %              | 62                  | 90                         | 44                     | 73                 | 83                 | 64          |
|            |                                  |         | A, %              | 38                  | 10                         | 56                     | 27                 | 17                 | 36          |
|            |                                  | Average | T, %              | <b>61.7</b>         | <b>90.3</b>                | <b>44.3</b>            | <b>75.0</b>        | <b>84.3</b>        | <b>65.3</b> |
|            |                                  |         | A, %              | <b>38.3</b>         | <b>9.7</b>                 | <b>55.7</b>            | <b>25.0</b>        | <b>15.7</b>        | <b>34.7</b> |
|            | $\Delta s$ , %                   |         | 0.58              | 0.58                | 0.58                       | 2.00                   | 1.53               | 1.15               |             |
|            | 60                               | 1       | T, %              |                     | 88                         | 43                     |                    | 82                 |             |
|            |                                  |         | A, %              |                     | 12                         | 57                     |                    | 18                 |             |
|            |                                  | 2       | T, %              |                     | 88                         | 43                     |                    | 80                 |             |
|            |                                  |         | A, %              |                     | 12                         | 57                     |                    | 20                 |             |
|            |                                  | 3       | T, %              |                     | 88                         | 45                     |                    | 82                 |             |
|            |                                  |         | A, %              |                     | 12                         | 55                     |                    | 18                 |             |
|            |                                  | Average | T, %              |                     | <b>88</b>                  | <b>43.67</b>           |                    | <b>81.33</b>       |             |
|            |                                  |         | A, %              |                     | <b>12</b>                  | <b>56.33</b>           |                    | <b>18.67</b>       |             |
|            | $\Delta s$ , %                   |         |                   | 0                   | 1.154701                   |                        | 1.154701           |                    |             |
|            | 70                               | 1       | T, %              |                     | 86                         | 41                     |                    |                    |             |
|            |                                  |         | A, %              |                     | 14                         | 59                     |                    |                    |             |
|            |                                  | 2       | T, %              |                     | 87                         | 41                     |                    |                    |             |
| A, %       |                                  |         |                   | 13                  | 59                         |                        |                    |                    |             |
| 3          |                                  | T, %    |                   | 87                  | 41                         |                        |                    |                    |             |
|            |                                  | A, %    |                   | 13                  | 59                         |                        |                    |                    |             |
| Average    |                                  | T, %    |                   | <b>86.67</b>        | <b>41.00</b>               |                        |                    |                    |             |
|            |                                  | A, %    |                   | <b>13.33</b>        | <b>59.00</b>               |                        |                    |                    |             |
| $\Delta s$ |                                  |         | 0.57735           | 0.00                |                            |                        |                    |                    |             |

<sup>1</sup> O'Neil, M. J.; Heckelman, P. E.; Ko. The Merck Index: An Encyclopedia of Chemicals, Drugs, and Biologicals, 14th Edition. *J. Am. Chem. Soc.* **2007**, 129 (7), 2197–2197.

Azide form tautomeric ratio (%) of compound 4d depending on temperature in different solvents (Table 1)

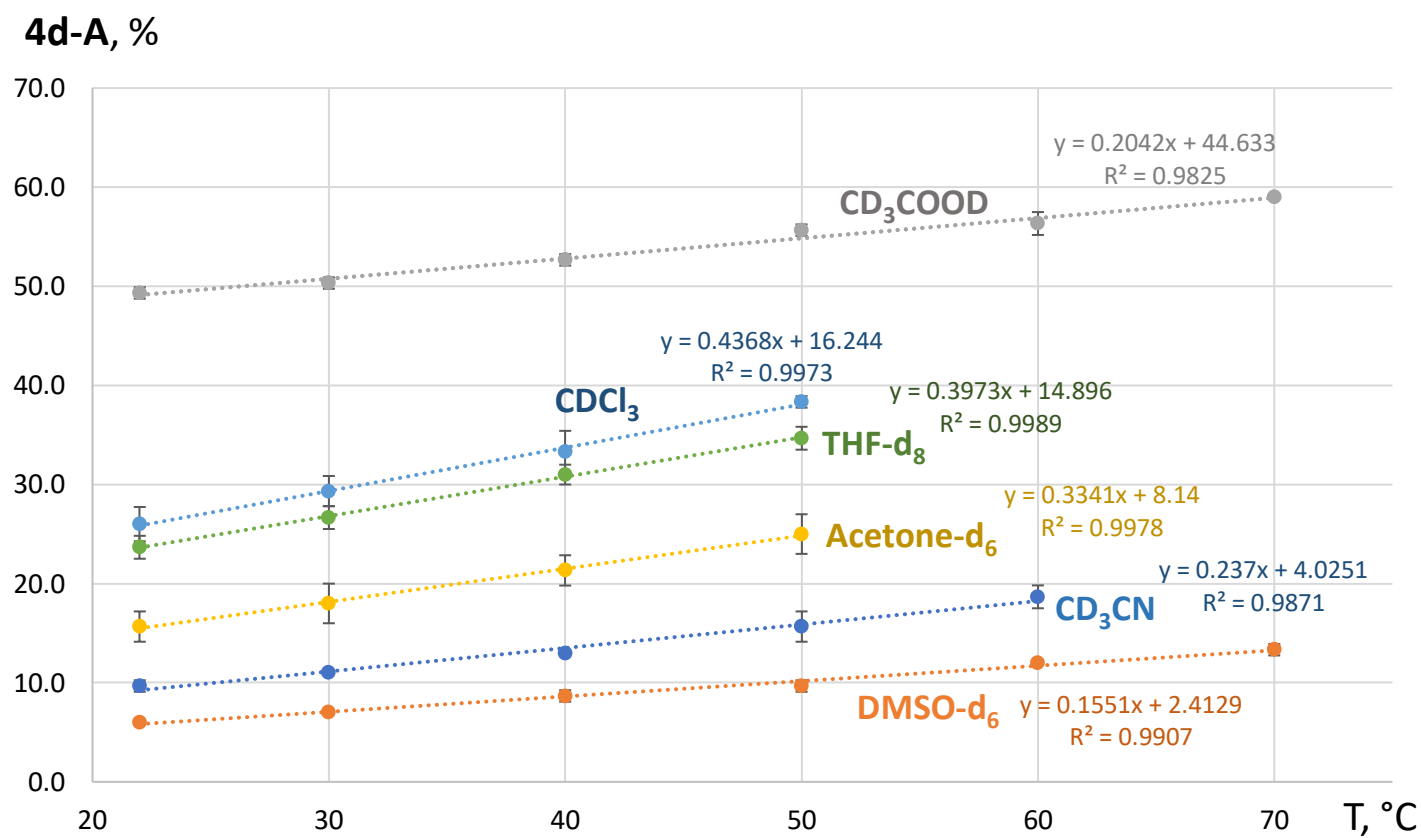



## UV/Vis absorption and emission spectra

Absorption spectra of 4-triazolylquinazoline derivatives **14** ( $c = 10^{-5}$  M; solvent – DCM):

Absorbance, A

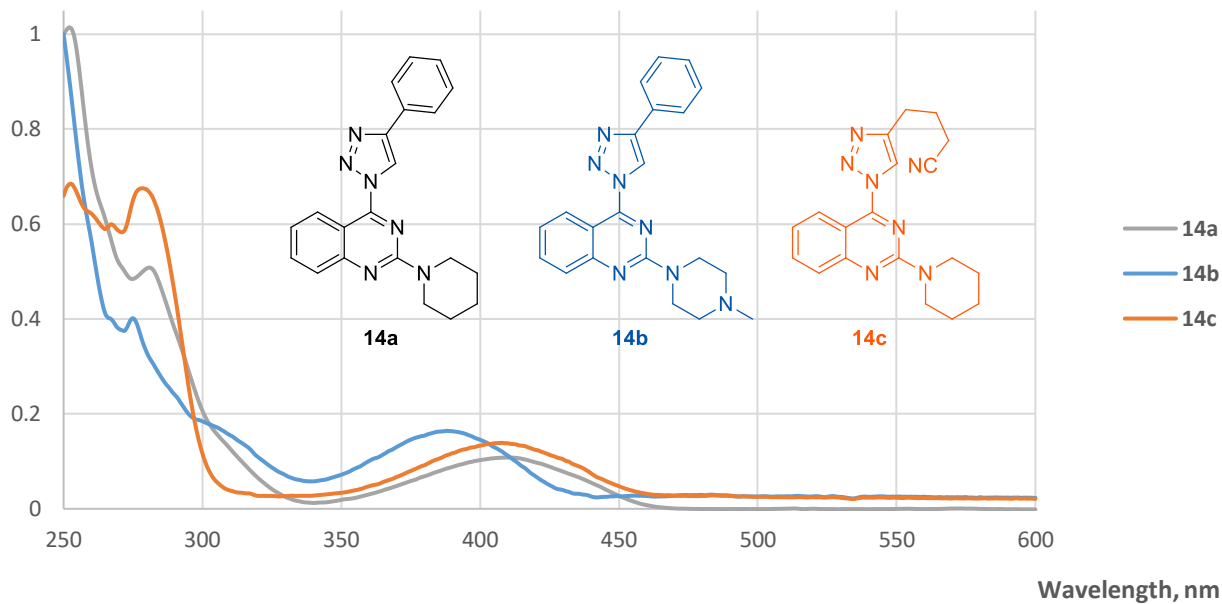

Emission spectra of 4-triazolylquinazoline derivatives **14a** ( $\lambda_{\text{exc}} = 405$  nm), **14b** ( $\lambda_{\text{exc}} = 380$  nm) and **14c** ( $\lambda_{\text{exc}} = 400$  nm) ( $c = 10^{-5}$  M; solvent – DCM):

Emission, E

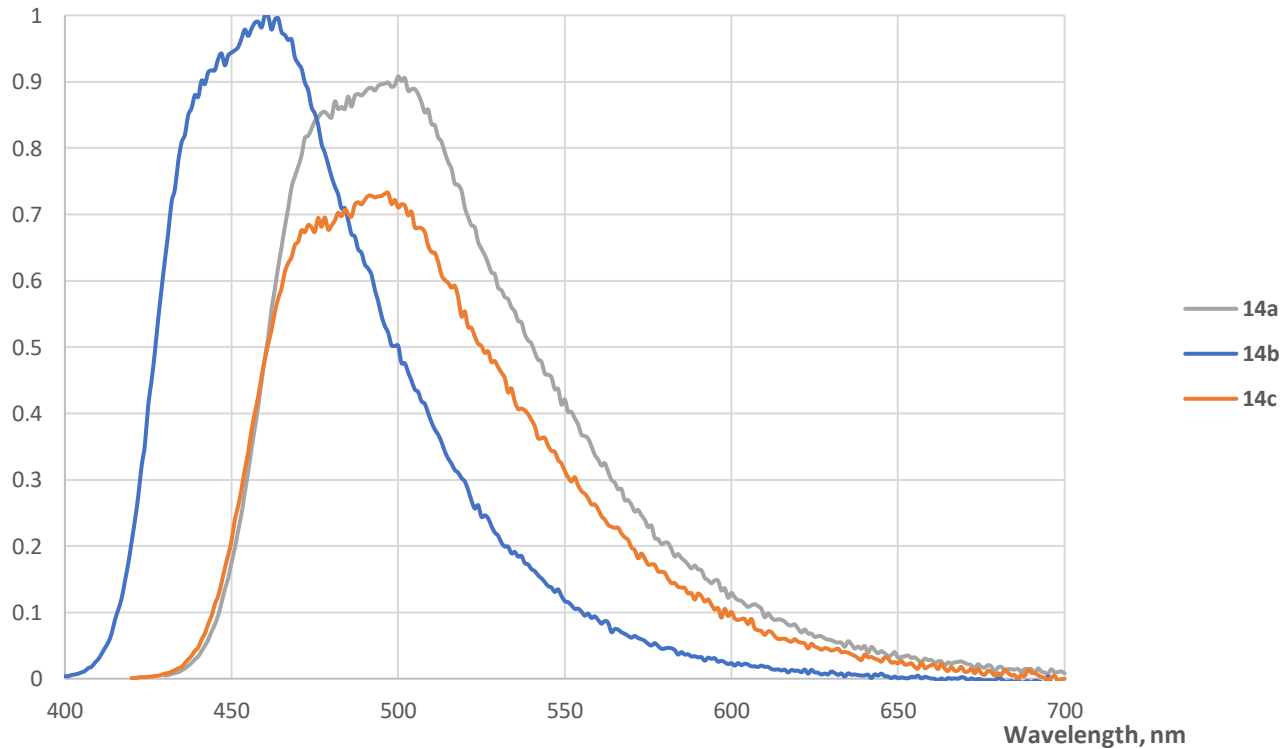

Absorption spectra of amino-arylthioquinazoline regioisomers **5b** and **13b** ( $c = 8 \times 10^{-6}$  M; solvent – DCM):

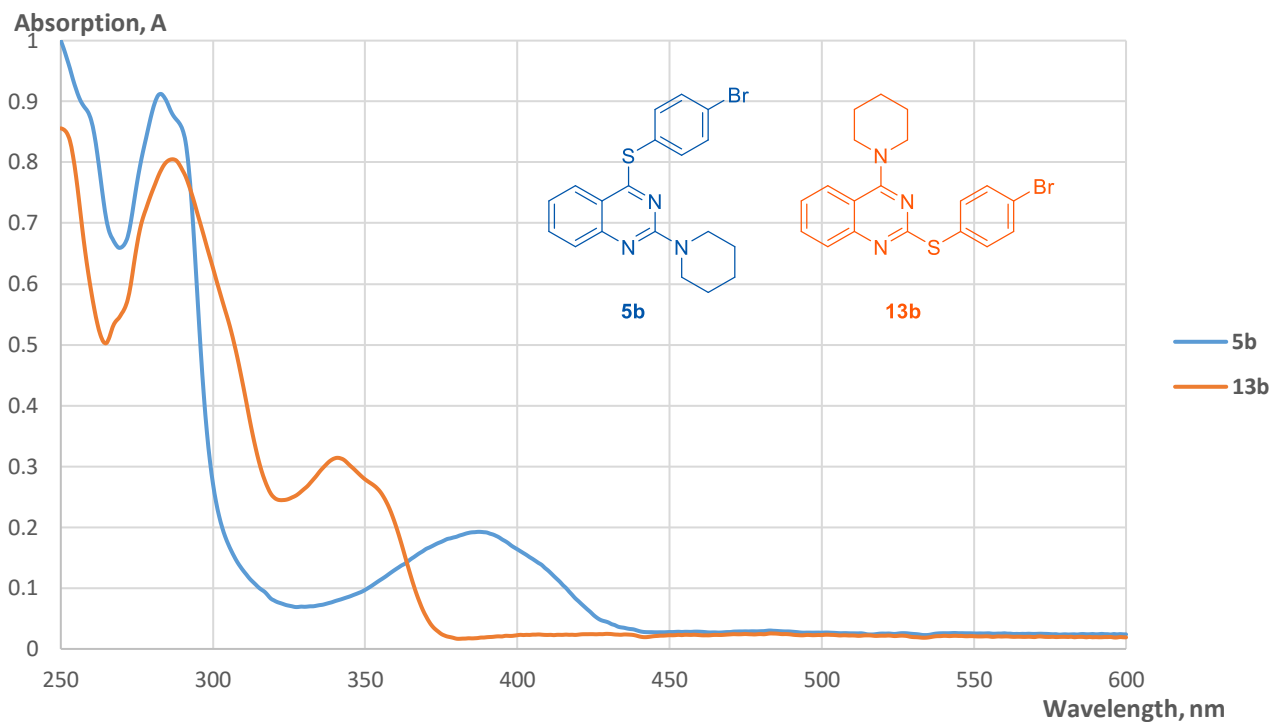

Emission spectra of amino-arylthioquinazoline regioisomers **5b** ( $\lambda_{exc} = 380$  nm) and **13b** ( $\lambda_{exc} = 320$  nm) ( $c = 8 \times 10^{-6}$  M; solvent – DCM):

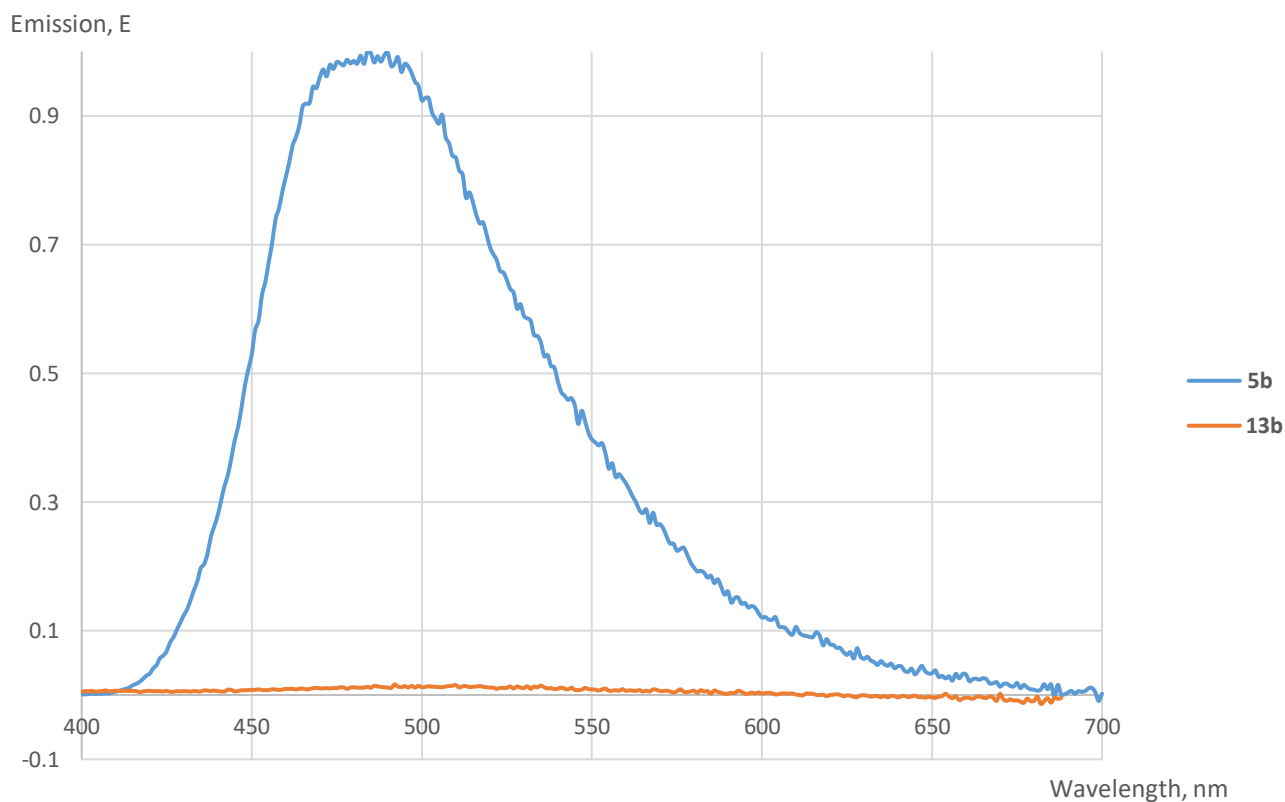

**Absorption spectra of quinazoline iminophosphoranes 16a and 16b ( $c = 9 \times 10^{-6}$  M; solvent – DCM):**

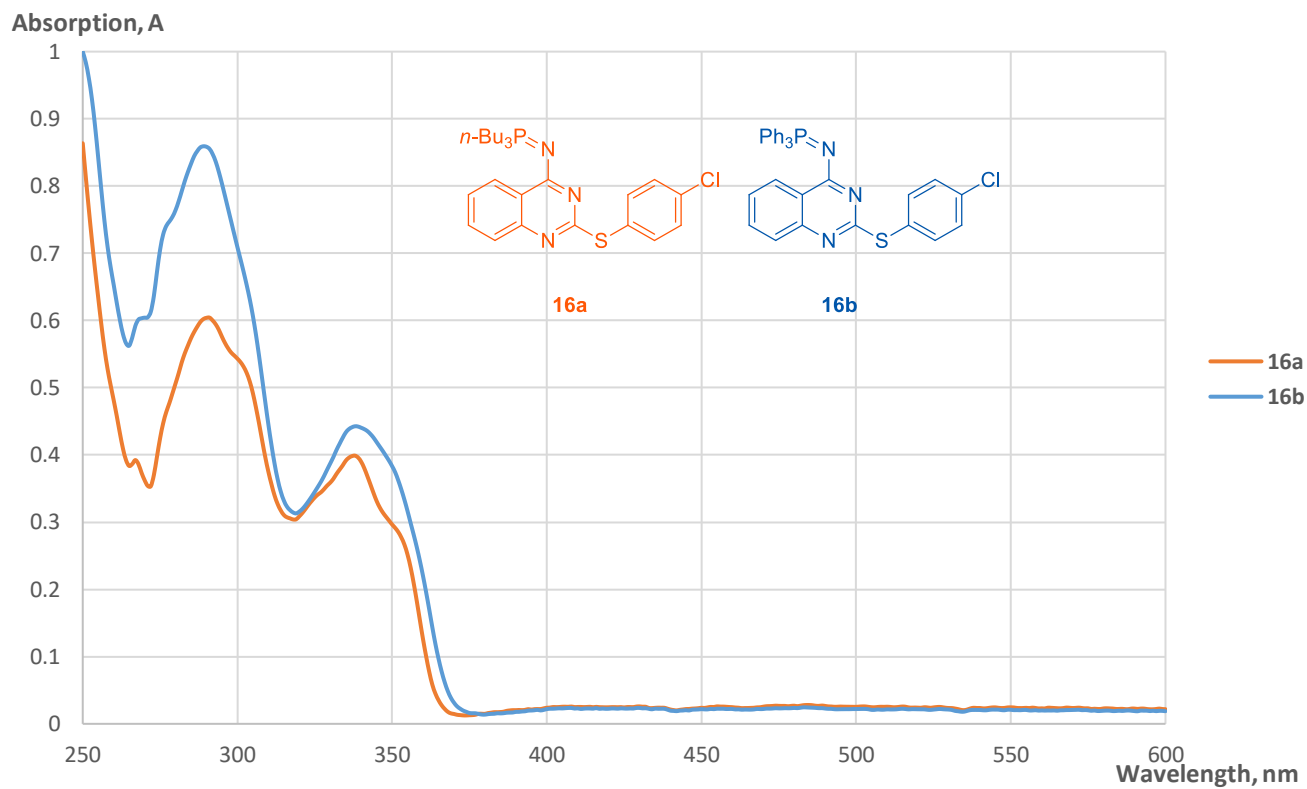

**Emission spectra of quinazoline iminophosphoranes 16a and 16b ( $\lambda_{exc} = 320$  nm) ( $c = 9 \times 10^{-6}$  M; solvent – DCM):**

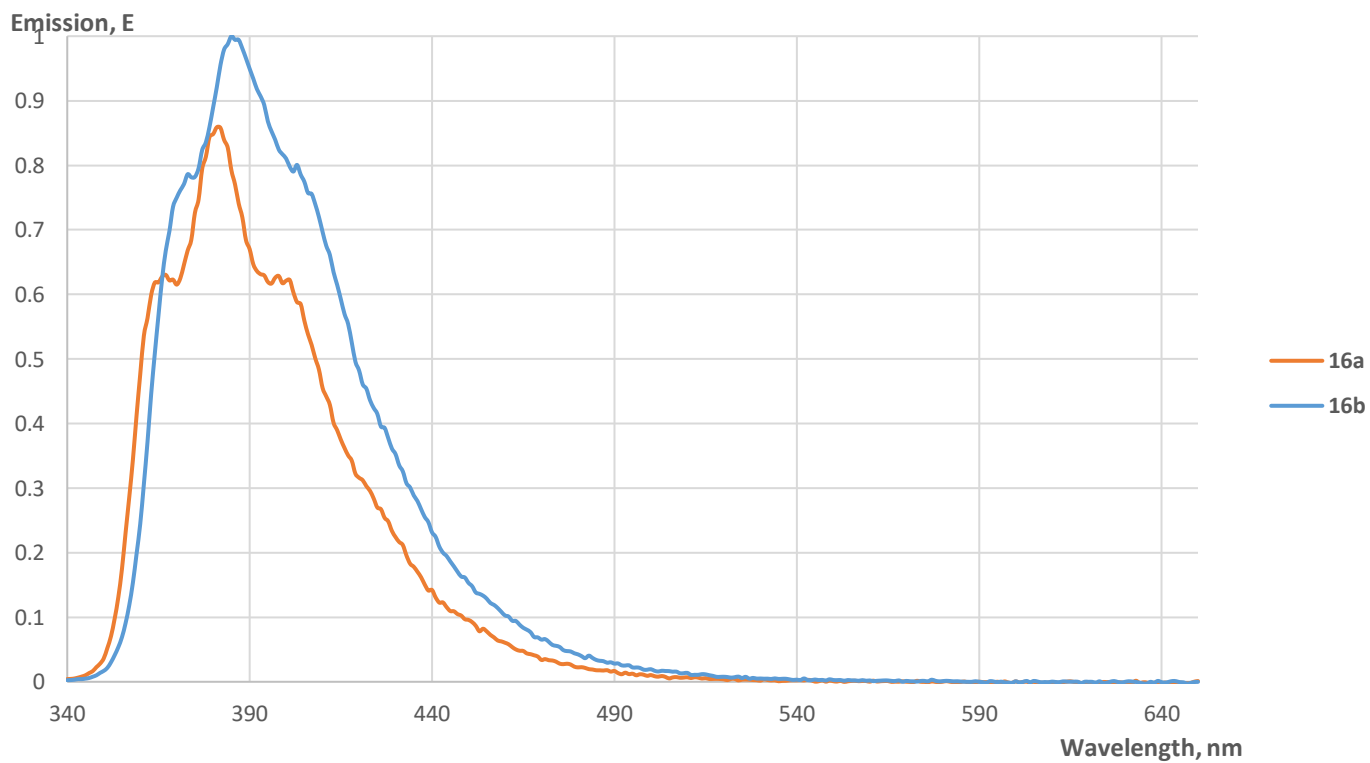

Supplement: d1ob01315g1.pdf [file d1ob01315g1.pdf]
